# Supplementary material for: N-Bromoacetamide-mediated domino cyclization and elimination of homoallylic trichloroacetimidates: a novel approach toward the synthesis of 1-bromo-2-amino-3-butene derivatives
Source: Royal Society of Chemistry journal article supplement (doi:10.1039/c4ob01126k), 2014-07-03

# ***N*-Bromoacetamide-mediated Domino Cyclization and Elimination of Homoallylic Trichloroacetimidates: A Novel Approach toward the Synthesis of 1-Bromo-2-Amino-3-Butene Derivatives**

## **Supporting Information**

Rui Zhu, Kai Yu, and Zhenhua Gu\*

University of Science and Technology of China  
96 Jinzhai Road, Hefei, Anhui, China, 230026

[zhgu@ustc.edu.cn](mailto:zhgu@ustc.edu.cn)

### **Typical Procedures for the preparation of 1:**

#### **Preparation of 1a:**

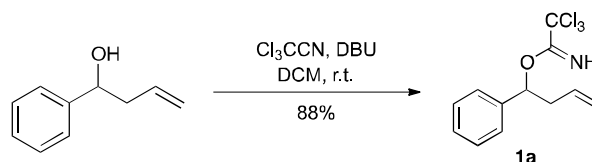

To a solution of 1-phenylbut-3-en-1-ol (0.444 g, 3.0 mmol, 1.0 equiv) in dry dichloromethane (6.0 mL) was added  $\text{Cl}_3\text{CCN}$  (0.45 mL, 9.0 mmol, 3.0 equiv) followed by DBU (45  $\mu\text{L}$ , 0.30 mmol, 10 mol %). The mixture was stirred at room temperature overnight before being concentrated in vacuo and purified by flash chromatography on neutral  $\text{Al}_2\text{O}_3$  (20/1 hexane/ethyl acetate) to provide **1a** (0.768 g, 88%) ( $R_f$  0.8, PE/EA = 10:1) as pale-yellow oil.  $^1\text{H}$  NMR (400 MHz,  $\text{CDCl}_3$ ):  $\delta$  8.29 (s, 1 H), 7.57-7.23 (m, 5 H), 5.99-5.88 (dd,  $J$  = 8.0, 5.6 Hz, 1 H), 5.88-5.72 (m, 1 H), 5.22-5.04 (m, 2 H), 2.91-2.75 (m, 1 H), 2.75-2.56 (m, 1 H);  $^{13}\text{C}$  NMR (100 MHz,  $\text{CDCl}_3$ ):  $\delta$  161.6, 139.7, 133.1, 128.4, 128.0, 126.2, 118.2, 91.7, 80.1, 41.1; HRMS (ESI): calcd for  $\text{C}_{12}\text{H}_{13}\text{NOCl}_3$  [ $\text{M}^+ + \text{H}$ ] 292.0063, found 292.0093.

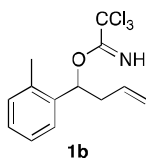

**1b** (0.833 g, 91%) ( $R_f$  0.8, PE/EA = 10:1) was prepared following the typical procedure in 3.0 mmol scale as pale-yellow oil.  $^1\text{H}$  NMR (400 MHz,  $\text{CDCl}_3$ ):  $\delta$  8.25 (s, 1 H), 7.53-7.42 (m, 1 H), 7.30-7.10 (m, 3 H), 6.06 (dd,  $J$  = 8.4, 5.2 Hz, 1 H), 5.94-5.75 (m, 1 H), 5.12 (m, 2 H), 2.86-2.62 (m, 1 H), 2.62-2.52 (m, 1 H), 2.45 (s, 3 H);  $^{13}\text{C}$  NMR (100 MHz,  $\text{CDCl}_3$ ):  $\delta$  161.4, 138.2, 135.0, 133.3, 130.2, 127.8, 126.2, 125.5, 118.1, 91.7, 77.1, 40.3, 19.2; HRMS (ESI): calcd for  $\text{C}_{13}\text{H}_{15}\text{NOCl}_3$  [ $\text{M}^+ + \text{H}$ ] 306.0219, found 306.0264.

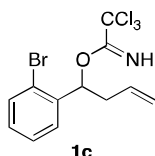

**1c** (0.952 g, 86%) ( $R_f$  0.8, PE/EA = 10:1) was prepared following the typical procedure in 3.0 mmol scale as pale-yellow oil.  $^1\text{H NMR}$  (400 MHz,  $\text{CDCl}_3$ ):  $\delta$  8.35 (s, 1 H), 7.56 (dd,  $J$  = 8.0, 1.2 Hz, 1 H), 7.51 (dd,  $J$  = 8.0, 1.6 Hz, 1 H), 7.32 (dt,  $J$  = 7.6, 1.0 Hz, 1 H), 7.16 (dt,  $J$  = 7.6, 1.6 Hz, 1 H), 6.22 (dd,  $J$  = 8.0, 4.8 Hz, 1 H), 5.96-5.83 (m, 1 H), 5.21-5.06 (m, 2 H), 2.79-2.60 (m, 2 H);  $^{13}\text{C NMR}$  (100 MHz,  $\text{CDCl}_3$ ):  $\delta$  161.2, 139.3, 132.8, 129.2, 127.7, 126.9, 121.9, 118.4, 91.5, 79.0, 39.6; HRMS (ESI): calcd for  $\text{C}_{12}\text{H}_{12}\text{NOCl}_3\text{Br}$  [ $\text{M}^+ + \text{H}$ ] 369.9168, found 369.9197.

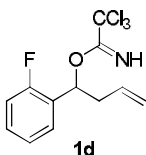

**1d** (0.751 g, 81%) ( $R_f$  0.8, PE/EA = 10:1) was prepared following the typical procedure in 3.0 mmol scale as pale-yellow oil.  $^1\text{H NMR}$  (400 MHz,  $\text{CDCl}_3$ ):  $\delta$  8.34 (s, 1 H), 7.48 (dt,  $J$  = 7.6, 1.6 Hz, 1 H), 7.33-7.24 (m, 1 H), 7.15 (dt,  $J$  = 7.2, 1.1 Hz, 1 H), 7.10-7.01 (m, 1 H), 6.23 (dd,  $J$  = 7.6, 5.6 Hz, 1 H), 5.91-5.76 (m, 1 H), 5.19-5.04 (m, 2 H), 2.87-2.63 (m, 2 H);  $^{13}\text{C NMR}$  (100 MHz,  $\text{CDCl}_3$ ):  $\delta$  161.3, 160.9, 158.4, 132.6, 129.5, 129.4, 127.22, 127.18, 127.05, 126.9, 124.19, 124.16, 118.5, 115.5, 115.3, 91.5, 74.04, 74.02, 39.8;  $^{19}\text{F NMR}$  (376 MHz,  $\text{CDCl}_3$ ):  $\delta$  -117.04; HRMS (ESI): calcd for  $\text{C}_{12}\text{H}_{12}\text{NOCl}_3\text{F}$  [ $\text{M}^+ + \text{H}$ ] 309.9969, found 310.0009.

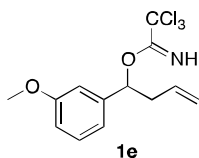

**1e** (0.799 g, 83%) ( $R_f$  0.8, PE/EA = 5:1) was prepared following the typical procedure in 3.0 mmol scale as colorless oil. *Two sets of signals were observed in the  $^{13}\text{C NMR}$  spectrum of 1e, which was also found in 1-(3'-methylphenyl)-but-3-en-1-ol in the literature<sup>1</sup>.*  $^1\text{H NMR}$  (400 MHz,  $\text{CDCl}_3$ ):  $\delta$  8.29 (s, 1 H), 7.28 (t,  $J$  = 8.0 Hz, 1 H), 7.06-6.80 (m, 3 H), 5.93-5.69 (m, 2 H), 5.22-5.04 (m, 2 H), 3.81 (s, 3 H), 2.87-2.73 (m, 1 H), 2.73-2.56 (m, 1 H);  $^{13}\text{C NMR}$  (100 MHz,  $\text{CDCl}_3$ ):  $\delta$  161.5, 159.7, 141.3, 133.1, 132.0, 129.8, 129.4, 119.2, 118.6, 118.5, 118.2, 114.0, 113.4, 112.0, 111.6, 91.7, 80.6, 79.9, 55.3, 55.2, 41.1, 40.6; HRMS (ESI): calcd for  $\text{C}_{13}\text{H}_{15}\text{NO}_2\text{Cl}_3$  [ $\text{M}^+ + \text{H}$ ] 322.0168, found 322.0164.

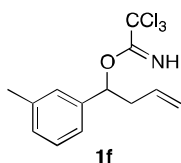

**1f** (0.805 g, 88%) ( $R_f$  0.8, PE/EA = 10:1) was prepared following the typical procedure in 3.0 mmol scale as pale-yellow oil. *Two sets of signals were observed in the  $^{13}\text{C NMR}$  spectrum of 1f.*  $^1\text{H NMR}$  (400 MHz,  $\text{CDCl}_3$ ):  $\delta$  8.28 (s, 1 H), 7.36-7.03 (m, 4 H), 5.94-5.67 (m, 2 H), 5.25-5.00 (m, 2 H), 2.89-2.72 (m, 1 H), 2.72-2.56 (m, 1 H), 2.36 (s, 3 H);  $^{13}\text{C NMR}$  (100 MHz,  $\text{CDCl}_3$ ):  $\delta$  161.6, 139.7, 138.0, 133.2, 132.2, 129.5, 128.8, 128.6, 128.3, 127.1, 126.9, 123.4, 123.2, 119.1, 118.1, 91.7, 80.9, 80.2, 41.2, 40.1, 21.5; HRMS (ESI): calcd for  $\text{C}_{13}\text{H}_{15}\text{NOCl}_3$  [ $\text{M}^+ + \text{H}$ ] 306.0219, found 306.0236.

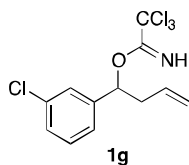

**1g** (0.799 g, 82%) ( $R_f$  0.8, PE/EA = 10:1) was prepared following the typical procedure in 3.0 mmol scale as pale-yellow oil.  $^1\text{H NMR}$  (400 MHz,  $\text{CDCl}_3$ ):  $\delta$  8.32 (s, 1 H), 7.40 (s, 1 H), 7.34-7.22 (m, 3 H), 5.92-5.70 (m, 2 H), 5.22-5.02 (m, 2 H), 2.86-2.72 (m, 1 H), 2.72-2.53 (m, 1 H);  $^{13}\text{C NMR}$  (100 MHz,  $\text{CDCl}_3$ ):  $\delta$  161.4, 141.7, 134.4, 132.6, 129.7, 128.2, 126.4, 124.4, 118.7, 91.5, 79.3, 40.9; HRMS (ESI): calcd for  $\text{C}_{12}\text{H}_{12}\text{NOCl}_4$  [ $\text{M}^+ + \text{H}$ ] 325.9673, found 325.9682.

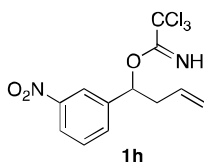

**1h** (0.766 g, 76%) ( $R_f$  0.5, PE/EA = 5:1) was prepared following the typical procedure in 3.0 mmol scale as brown oil.  $^1\text{H NMR}$  (400 MHz,  $\text{CDCl}_3$ ):  $\delta$  8.36 (s, 1 H), 8.29 (t,  $J$  = 2.0 Hz, 1 H), 8.21-8.13 (m, 1 H), 7.69-7.76 (m, 1 H), 7.54 (t,  $J$  = 8.0 Hz, 1 H), 5.97 (dd,  $J$  = 7.6, 5.6 Hz, 1 H), 5.87-5.72 (m, 1 H), 5.21-5.07 (m, 2 H), 2.91-2.75 (m, 1 H), 2.75-2.58 (m, 1 H);  $^{13}\text{C NMR}$  (100 MHz,  $\text{CDCl}_3$ ):  $\delta$  161.3, 148.4, 141.8, 132.4, 131.9, 129.4, 123.0, 121.4, 119.2, 91.2, 78.7, 40.7; HRMS (ESI): calcd for  $\text{C}_{12}\text{H}_{12}\text{N}_2\text{O}_3\text{Cl}_3$  [ $\text{M}^+ + \text{H}$ ] 336.9914, found 336.9909.

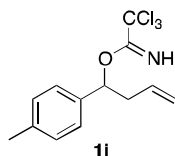

**1i** (0.750 g, 82%) ( $R_f$  0.8, PE/EA = 10:1) was prepared following the typical procedure in 3.0 mmol scale as pale-yellow oil.  $^1\text{H NMR}$  (400 MHz,  $\text{CDCl}_3$ ):  $\delta$  8.27 (s, 1 H), 7.39-7.27 (m, 2 H), 7.23-7.14 (m, 2 H), 5.92-5.68 (m, 2 H), 5.22-5.02 (m, 2 H), 2.90-2.72 (m, 1 H), 2.72-2.56 (m, 1 H), 2.35 (s, 3 H);  $^{13}\text{C NMR}$  (100 MHz,  $\text{CDCl}_3$ ):  $\delta$  161.6, 137.7, 136.7, 133.2, 129.1, 126.2, 118.1, 91.8, 80.1, 41.1, 21.2; HRMS (ESI): calcd for  $\text{C}_{13}\text{H}_{15}\text{NOCl}_3$  [ $\text{M}^+ + \text{H}$ ] 306.0219, found 306.0246.

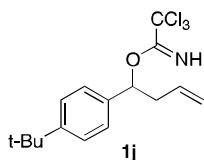

**1j** (0.916 g, 88%) ( $R_f$  0.8, PE/EA = 10:1) was prepared following the typical procedure in 3.0 mmol scale as pale-yellow oil.  $^1\text{H NMR}$  (400 MHz,  $\text{CDCl}_3$ ):  $\delta$  8.28 (s, 1 H), 7.45-7.28 (m, 4 H), 5.95-5.71 (m, 2 H), 5.21-5.03 (m, 2 H), 2.89-2.72 (m, 1 H), 2.72-2.55 (m, 1 H), 1.32 (s, 9 H);  $^{13}\text{C NMR}$  (100 MHz,  $\text{CDCl}_3$ ):  $\delta$  161.6, 150.8, 136.6, 133.4, 125.8, 125.3, 118.0, 91.8, 80.0, 41.1, 34.6, 31.3; HRMS (ESI): calcd for  $\text{C}_{16}\text{H}_{21}\text{NOCl}_3$  [ $\text{M}^+ + \text{H}$ ] 348.0689, found 348.0663.

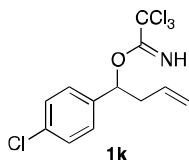

**1k** (0.761 g, 78%) ( $R_f$  0.8, PE/EA = 10:1) was prepared following the typical procedure in 3.0 mmol scale as pale-yellow oil.  $^1\text{H NMR}$  (400 MHz,  $\text{CDCl}_3$ ):  $\delta$  8.31 (s, 1 H), 7.34 (s, 4 H), 5.85 (dd,  $J$  = 7.6, 5.6 Hz, 1 H), 5.83-5.71 (m, 1 H), 5.16-5.05 (m, 2 H), 2.83-2.72 (m, 1 H), 2.72-2.56 (m, 1 H);  $^{13}\text{C NMR}$  (100 MHz,  $\text{CDCl}_3$ ):  $\delta$  161.4, 138.1, 133.8, 132.6, 128.6, 127.7, 118.6, 91.5, 79.4, 40.8; HRMS (ESI): calcd for  $\text{C}_{12}\text{H}_{12}\text{NOCl}_4$  [ $\text{M}^+ + \text{H}$ ] 325.9673, found 325.9639.

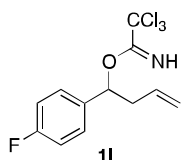

**1l** (0.742 g, 80%) ( $R_f$  0.8, PE/EA = 10:1) was prepared following the typical procedure in 3.0 mmol scale as pale-yellow oil.  $^1\text{H NMR}$  (400 MHz,  $\text{CDCl}_3$ ):  $\delta$  8.30 (s, 1 H), 7.50-7.30 (m, 2 H), 7.16-6.95 (m, 2 H), 6.01-5.66 (m, 2 H), 5.24-4.99 (m, 2 H), 2.90-2.72 (m, 1 H), 2.72-2.52 (m, 1 H);  $^{13}\text{C NMR}$  (100 MHz,  $\text{CDCl}_3$ ):  $\delta$  163.7, 161.5, 161.2, 135.4, 135.3, 132.8, 128.2, 128.1, 118.5, 115.4, 115.2, 91.6, 79.4, 40.9;  $^{19}\text{F NMR}$  (376 MHz,  $\text{CDCl}_3$ ):  $\delta$  -114.08; HRMS (ESI): calcd for  $\text{C}_{12}\text{H}_{12}\text{NOCl}_3\text{F}$  [ $\text{M}^+ + \text{H}$ ] 309.9969, found 309.9982.

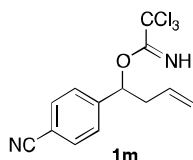

**1m** (0.872 g, 92%) ( $R_f$  0.7, PE/EA = 5:1) was prepared following the typical procedure in 3.0 mmol scale as white solid.  $^1\text{H NMR}$  (400 MHz,  $\text{CDCl}_3$ ):  $\delta$  8.34 (s, 1 H), 7.72-7.62 (m, 2 H), 7.54-7.46 (m, 2 H), 5.90 (dd,  $J$  = 7.2, 5.6 Hz, 1 H), 5.83-5.68 (m, 1 H), 5.19-5.05 (m, 2 H), 2.83-2.73 (m, 1 H), 2.73-2.57 (m, 1 H);  $^{13}\text{C NMR}$  (100 MHz,  $\text{CDCl}_3$ ):  $\delta$  161.3, 144.9, 132.3, 132.0, 126.9, 119.1, 118.6, 111.9, 91.3, 79.1, 40.6; HRMS (ESI): calcd for  $\text{C}_{13}\text{H}_{12}\text{N}_2\text{OCl}_3$  [ $\text{M}^+ + \text{H}$ ] 317.0015, found 317.0026.

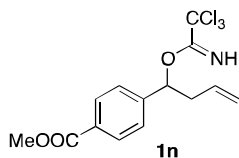

**1n** (0.712 g, 68%) ( $R_f$  0.6, PE/EA = 10:1) was prepared following the typical procedure in 3.0 mmol scale as pale-yellow oil.  $^1\text{H NMR}$  (400 MHz,  $\text{CDCl}_3$ ):  $\delta$  8.31 (s, 1 H), 8.00-7.99 (m, 2 H), 7.47 (d,  $J$  = 8.4 Hz, 2 H), 5.92 (dd,  $J$  = 7.6, 5.6 Hz, 1 H), 5.86-5.70 (m, 1 H), 5.19-5.03 (m, 2 H), 3.91 (s, 3 H), 2.86-2.72 (m, 1 H), 2.72-2.57 (m, 1 H);  $^{13}\text{C NMR}$  (100 MHz,  $\text{CDCl}_3$ ):  $\delta$  166.8, 161.4, 144.7, 132.5, 129.81, 129.77, 126.2, 118.7, 91.2, 79.5, 52.1, 40.8; HRMS (ESI): calcd for  $\text{C}_{14}\text{H}_{15}\text{NO}_3\text{Cl}_3$  [ $\text{M}^+ + \text{H}$ ] 350.0118, found 350.0107.

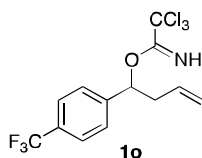

**1o** (0.926 g, 86%) ( $R_f$  0.8, PE/EA = 10:1) was prepared following the typical procedure in 3.0 mmol scale as yellow oil.  $^1\text{H NMR}$  (400 MHz,  $\text{CDCl}_3$ ):  $\delta$  8.33 (s, 1 H), 7.62 (d,  $J$  = 8.4 Hz, 2 H), 7.52 (d,  $J$  = 8.4 Hz, 2 H), 5.92 (dd,  $J$  = 7.6, 6.0 Hz, 1 H), 5.86-5.73 (m, 1 H), 5.23-5.05 (m, 2 H), 2.87-2.72 (m, 1 H), 2.72-2.57 (m, 1 H);  $^{13}\text{C NMR}$  (100 MHz,  $\text{CDCl}_3$ ):  $\delta$  161.4, 143.6, 132.3, 130.3, 126.5, 125.49, 125.46, 125.42, 125.38, 122.7, 118.8, 91.4, 79.3, 40.8;  $^{19}\text{F NMR}$  (376 MHz,  $\text{CDCl}_3$ ):  $\delta$  -62.59; HRMS (ESI): calcd for  $\text{C}_{13}\text{H}_{12}\text{NOCl}_3\text{F}_3$  [ $\text{M}^+\text{H}$ ] 359.9937, found 359.9933.

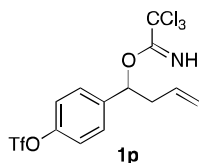

**1p** (0.961 g, 73%) ( $R_f$  0.8, PE/EA = 10:1) was prepared following the typical procedure in 3.0 mmol scale as yellow oil.  $^1\text{H NMR}$  (400 MHz,  $\text{CDCl}_3$ ):  $\delta$  8.34 (s, 1 H), 7.55-7.44 (m, 2 H), 7.33-7.23 (m, 2 H), 5.91 (dd,  $J$  = 7.6, 5.6 Hz, 1 H), 5.85-5.70 (m, 1 H), 5.19-5.06 (m, 2 H), 2.84-2.72 (m, 1 H), 2.72-2.57 (m, 1 H);  $^{13}\text{C NMR}$  (100 MHz,  $\text{CDCl}_3$ ):  $\delta$  161.3, 149.0, 140.2, 132.3, 128.1, 121.3, 120.3, 118.9, 117.1, 91.4, 78.9, 40.8; HRMS (ESI): calcd for  $\text{C}_{13}\text{H}_{12}\text{NO}_4\text{Cl}_3\text{F}_3\text{S}$  [ $\text{M}^+\text{H}$ ] 439.9505, found 439.9477.

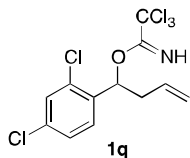

**1q** (0.872 g, 81%) ( $R_f$  0.8, PE/EA = 10:1) was prepared following the typical procedure in 3.0 mmol scale as pale-yellow oil.  $^1\text{H NMR}$  (400 MHz,  $\text{CDCl}_3$ ):  $\delta$  8.35 (s, 1 H), 7.44 (d,  $J$  = 8.4 Hz, 1 H), 7.39 (d,  $J$  = 2.0 Hz, 1 H), 7.29-7.22 (m, 1 H), 6.22 (t,  $J$  = 6.4 Hz, 1 H), 5.92-5.77 (m, 1 H), 5.18-5.05 (m, 2 H), 2.73-2.62 (m, 2 H);  $^{13}\text{C NMR}$  (100 MHz,  $\text{CDCl}_3$ ):  $\delta$  161.1, 136.3, 134.1, 132.7, 132.3, 129.3, 127.7, 127.4, 118.8, 91.3, 76.3, 39.4; HRMS (ESI): calcd for  $\text{C}_{12}\text{H}_{11}\text{NOCl}_5$  [ $\text{M}^+\text{H}$ ] 359.9283, found 359.9292.

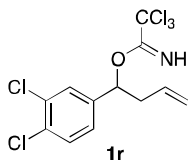

**1r** (0.829 g, 77%) ( $R_f$  0.8, PE/EA = 10:1) was prepared following the typical procedure in 3.0 mmol scale as yellow oil.  $^1\text{H NMR}$  (400 MHz,  $\text{CDCl}_3$ ):  $\delta$  8.34 (s, 1 H), 7.49 (d,  $J$  = 2.0 Hz, 1 H), 7.46-7.39 (m, 1 H), 7.26-7.21 (m, 1 H), 5.89-5.68 (m, 2 H), 5.22-5.05 (m, 2 H), 2.83-2.72 (m, 1 H), 2.72-2.53 (m, 1 H);  $^{13}\text{C NMR}$  (100 MHz,  $\text{CDCl}_3$ ):  $\delta$  161.3, 139.9, 132.6, 132.2, 132.0, 130.5, 128.4, 125.7, 119.0, 91.3, 78.7, 40.7; HRMS (ESI): calcd for  $\text{C}_{12}\text{H}_{11}\text{NOCl}_5$  [ $\text{M}^+\text{H}$ ] 359.9283, found 359.9249.

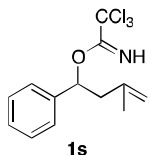

**1s** (0.695 g, 76%) ( $R_f$  0.8, PE/EA = 10:1) was prepared following the typical procedure in 3.0 mmol scale as pale-red oil.  $^1\text{H NMR}$  (400 MHz,  $\text{CDCl}_3$ ):  $\delta$  8.26 (s, 1 H), 7.52-7.26 (m, 5 H), 6.01 (dd,  $J$  = 8.8, 4.8 Hz, 1 H), 4.85-4.80 (m, 1 H), 4.80-4.74 (m, 1 H), 2.79 (dd,  $J$  = 14.4, 8.8 Hz, 1 H), 2.51 (dd,  $J$  = 14.4, 5.2 Hz, 1 H), 1.79 (s, 3 H);  $^{13}\text{C NMR}$  (100 MHz,  $\text{CDCl}_3$ ):  $\delta$  161.6, 140.8, 140.1, 128.4, 128.0, 126.2, 113.8, 91.7, 79.3, 45.1, 22.8; HRMS (ESI): calcd for  $\text{C}_{13}\text{H}_{15}\text{NOCl}_3$  [ $\text{M}^+ + \text{H}$ ] 306.0219, found 306.0227.

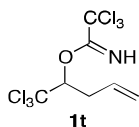

**1t** (0.775 g, 78%) ( $R_f$  0.7, PE/EA = 10:1) was prepared following the typical procedure in 3.0 mmol scale as yellow oil.  $^1\text{H NMR}$  (400 MHz,  $\text{CDCl}_3$ ):  $\delta$  8.63 (s, 1 H), 5.88 (dd,  $J$  = 9.6, 2.4 Hz, 1 H), 5.86-5.77 (m, 1 H), 5.29-5.12 (m, 2 H), 3.11-2.90 (m, 1 H), 2.80-2.68 (m, 1 H);  $^{13}\text{C NMR}$  (100 MHz,  $\text{CDCl}_3$ ):  $\delta$  161.7, 131.3, 119.6, 99.1, 90.8, 83.7, 35.5; HRMS (ESI): calcd for  $\text{C}_7\text{H}_8\text{NOCl}_6$  [ $\text{M}^+ + \text{H}$ ] 331.8732, found 331.8726.

#### Hydrolysis of **4a** to amino alcohol **S1**:

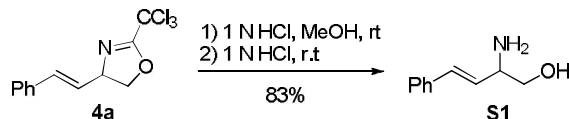

To a solution of **4a** (58 mg, 0.20 mmol) in methanol (2.0 mL) was added 1 *N* hydrochloric acid (2.0 mL) and the mixture was stirred at 25 °C for 1.5 h until complete consumption of the starting material as monitored by TLC analysis. 1 *N* NaOH (3.0 mL) was added to the solution and stirred at room temperature overnight. Water (10 mL) was added and the mixture was extracted with dichloromethane (3×10 mL), washed with brine (15 mL), dried over sodium sulfate, filtrated and concentrated to afford **S1** (27 mg, 83%, 93% purity) as a white solid. The spectra were consist with the previously reported analysis data.<sup>2</sup>  $^1\text{H NMR}$  (400 MHz,  $\text{CDCl}_3$ ):  $\delta$  7.45-7.18 (m, 5 H), 6.57 (d,  $J$  = 16.0 Hz, 1 H), 6.16 (dd,  $J$  = 16.0, 6.8 Hz, 1 H), 3.74-3.57 (m, 2 H), 3.46 (dd,  $J$  = 10.0, 7.2 Hz, 1 H), 1.99 (s, 3 H);  $^{13}\text{C NMR}$  (100 MHz,  $\text{CDCl}_3$ ):  $\delta$  136.7, 130.8, 130.7, 128.6, 127.7, 126.4, 66.6, 55.4.

#### References:

- Huang, J.-M.; Dong Y. *Chem. Commun.*, **2009**, 3943-3945.
- (a) Felpin, F. X.; Boubekeur, K.; Lebreton, J. *Eur. J. Org. Chem.* **2003**, 4518-4527. (b) Felpin, F. X.; Boubekeur, K.; Lebreton, J. *J. Org. Chem.* **2004**, 69, 1497-1503.

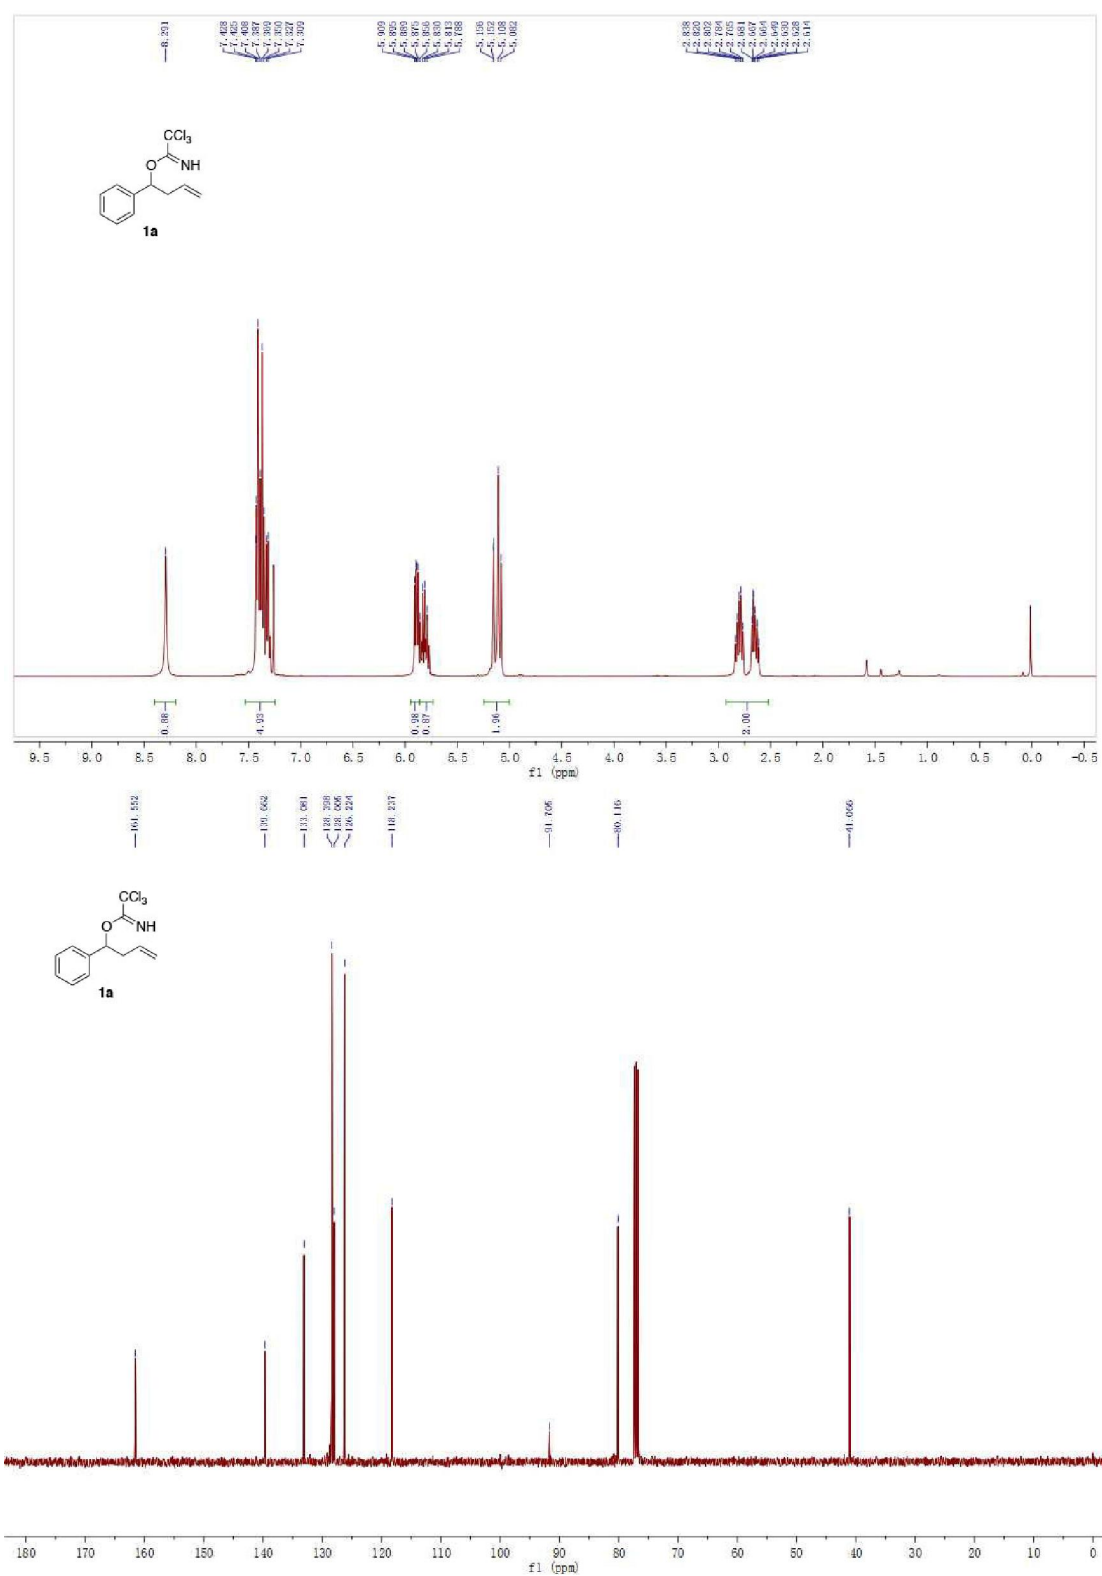

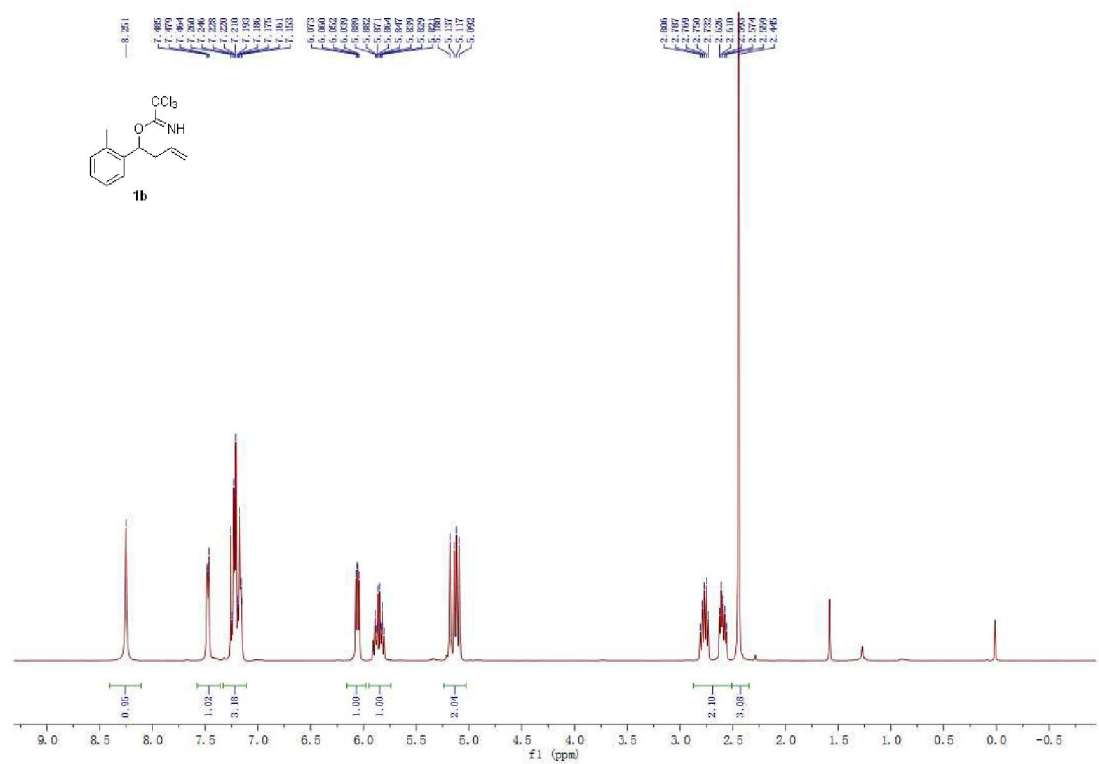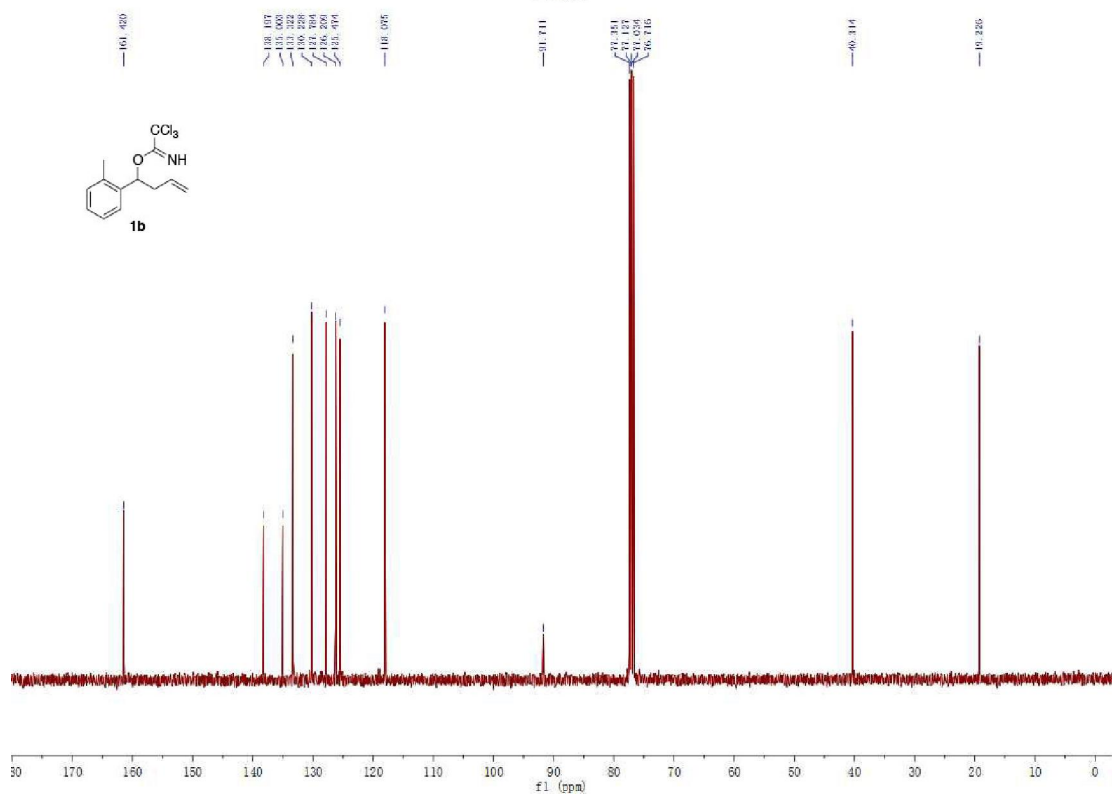



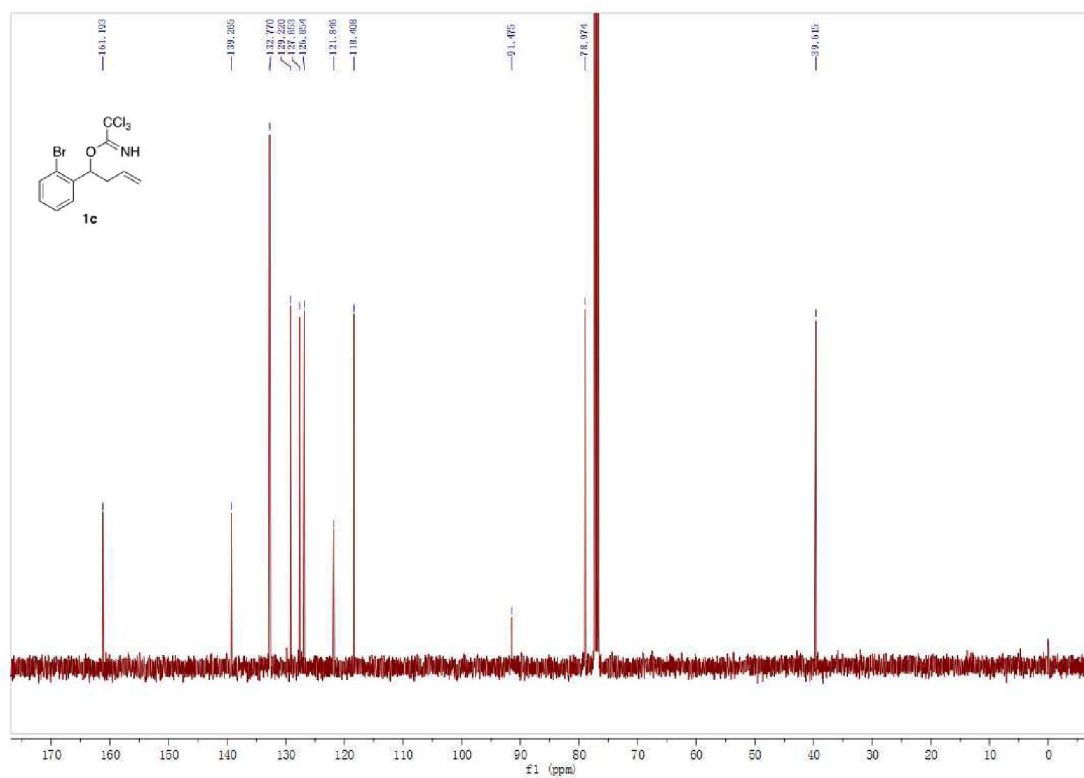

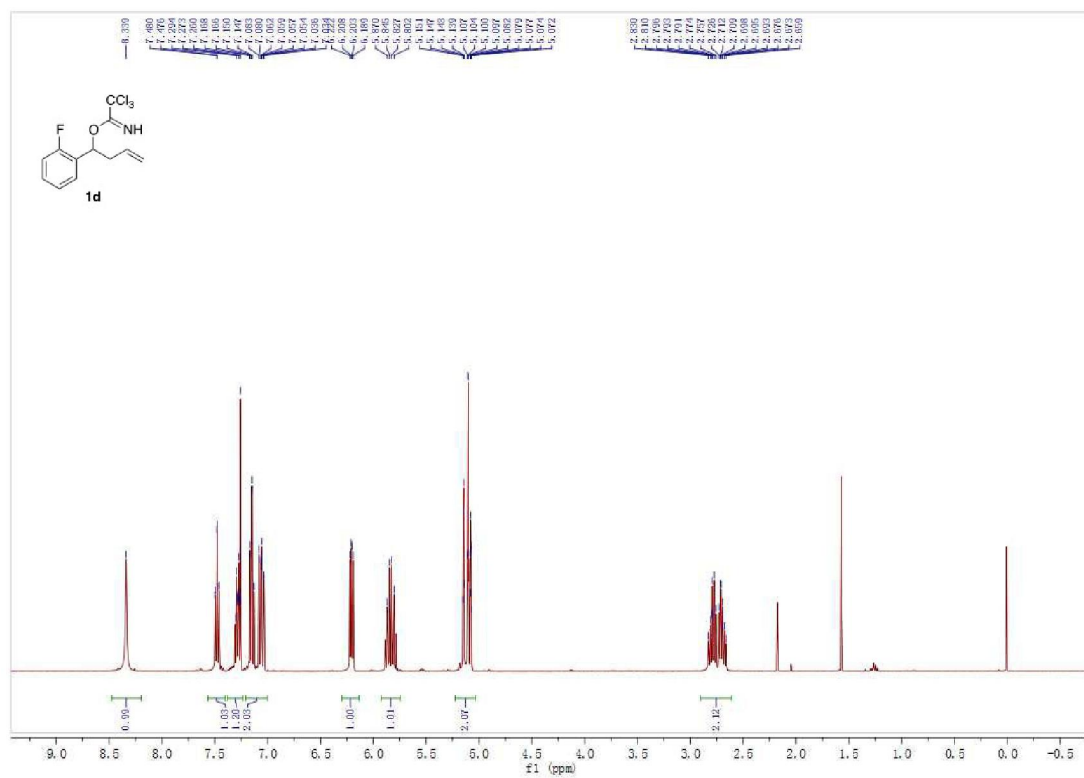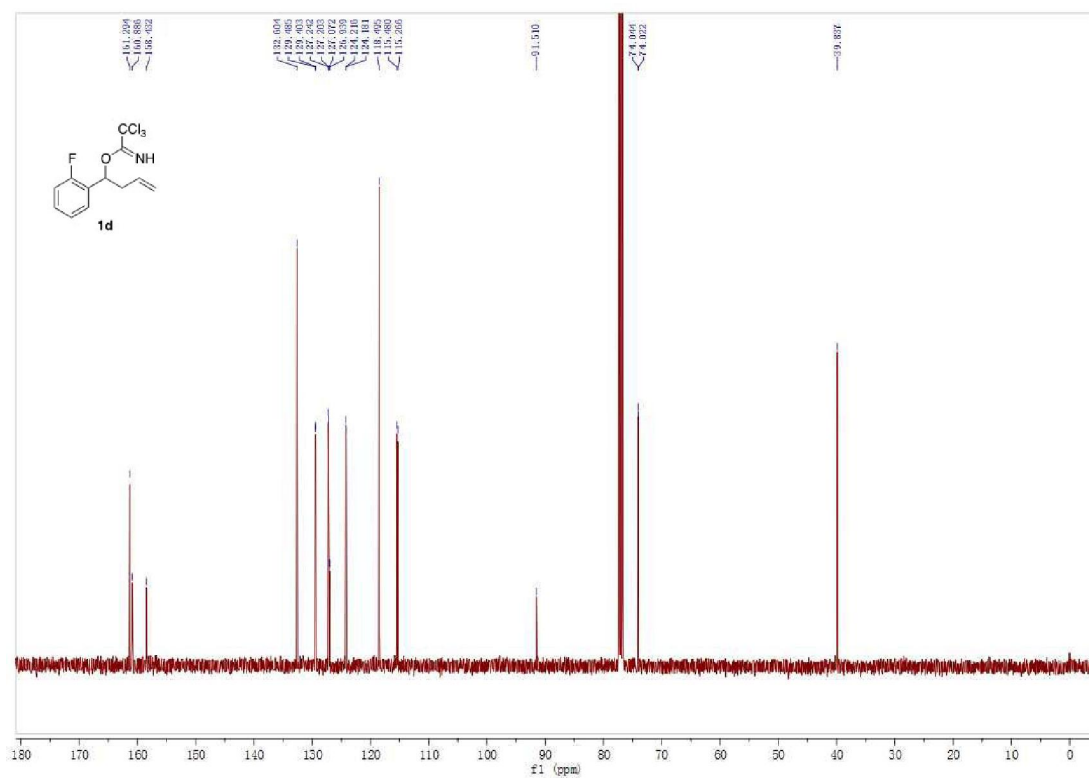

**1d**

C=CC(OC(=O)N)C1=CC=CC=C1F

117.008

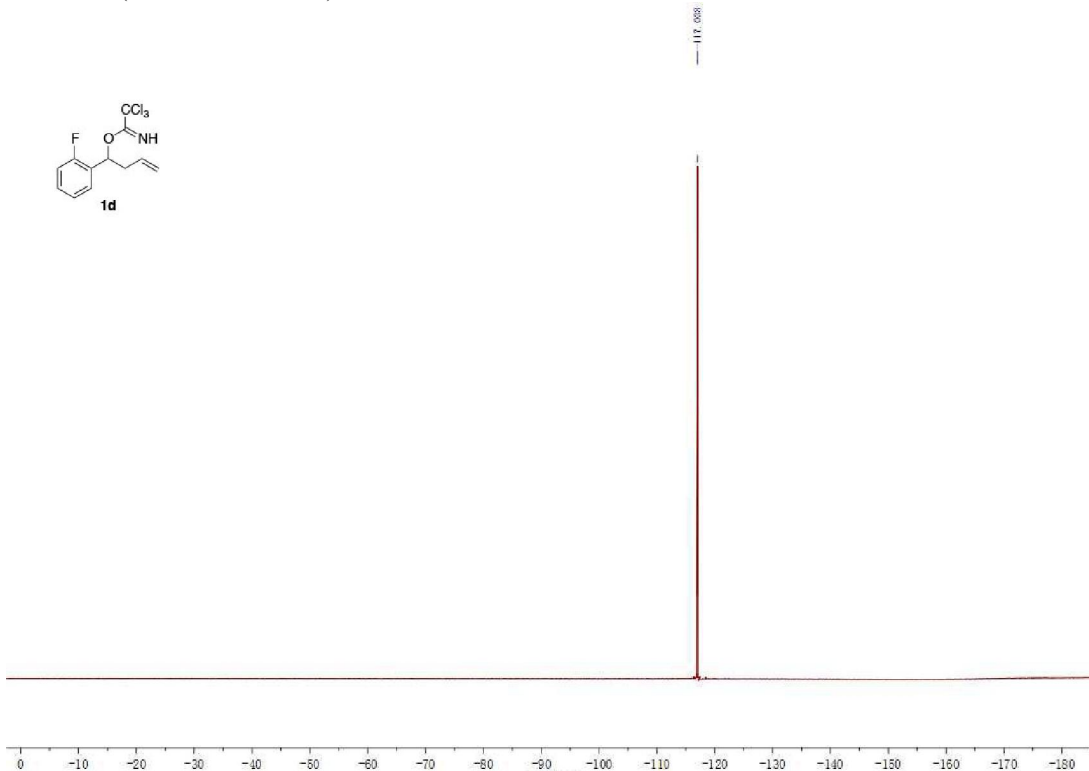

13C NMR spectrum (CDCl<sub>3</sub>) of compound **1d**. The spectrum shows a single sharp peak at 117.008 ppm, corresponding to the solvent (CDCl<sub>3</sub>). The x-axis is labeled δ<sub>13</sub> (ppm) and ranges from 0 to -180.

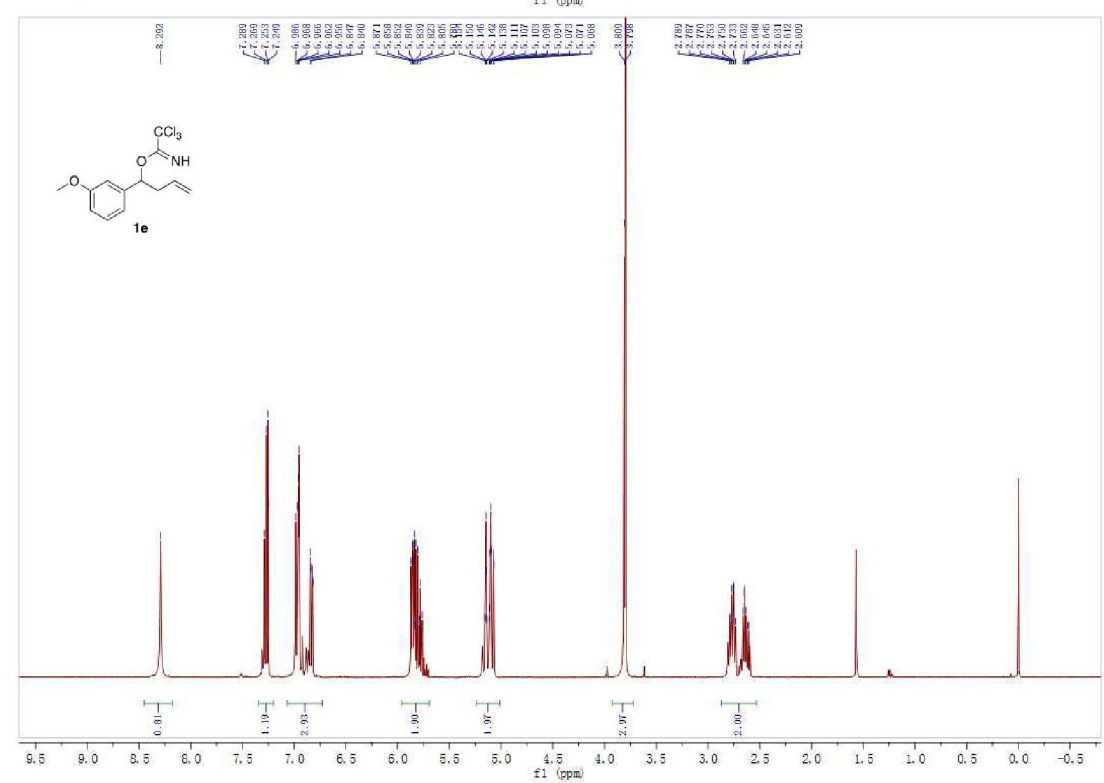

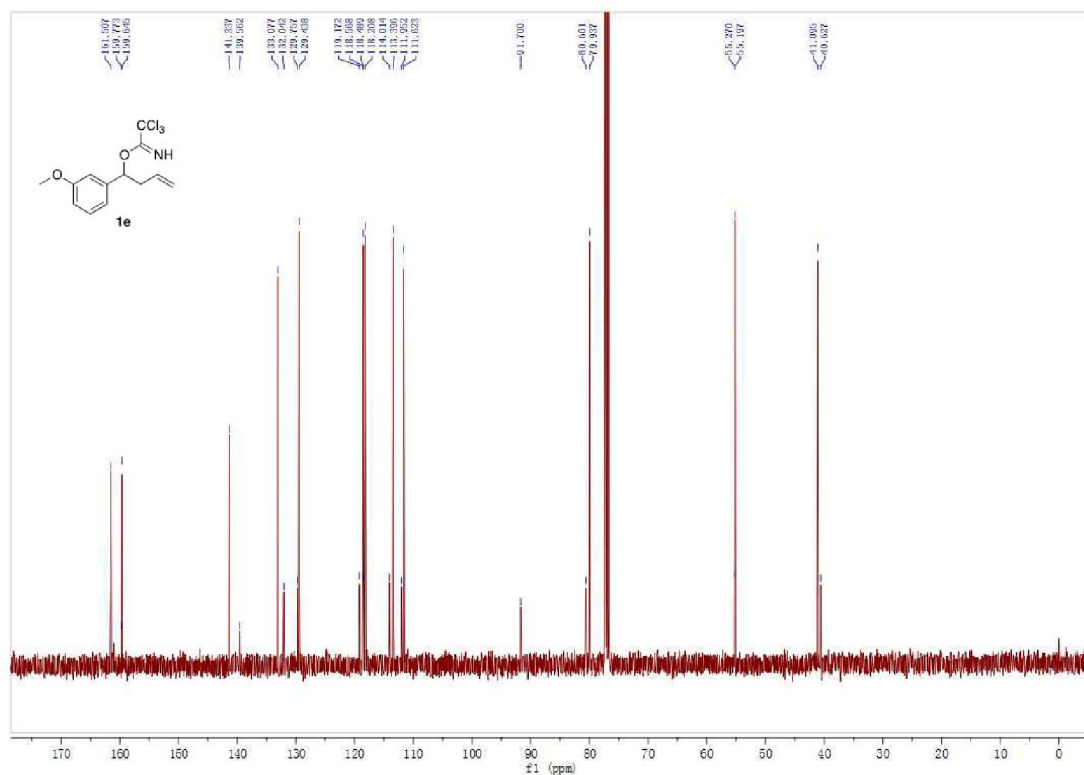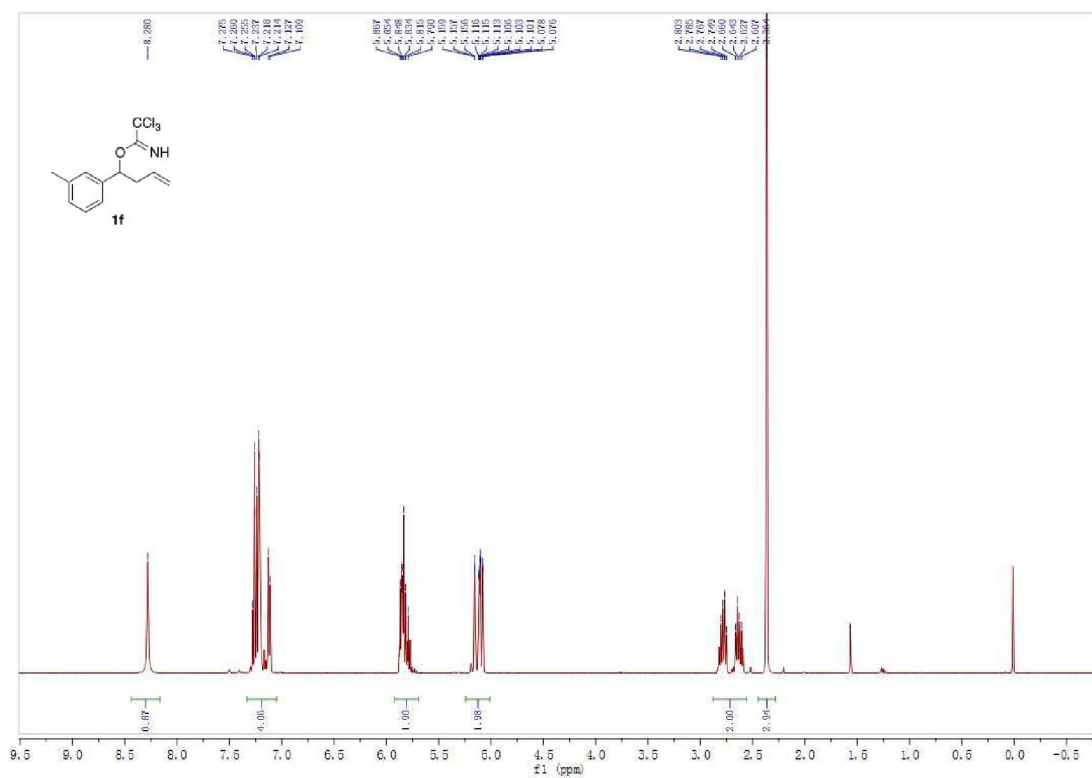

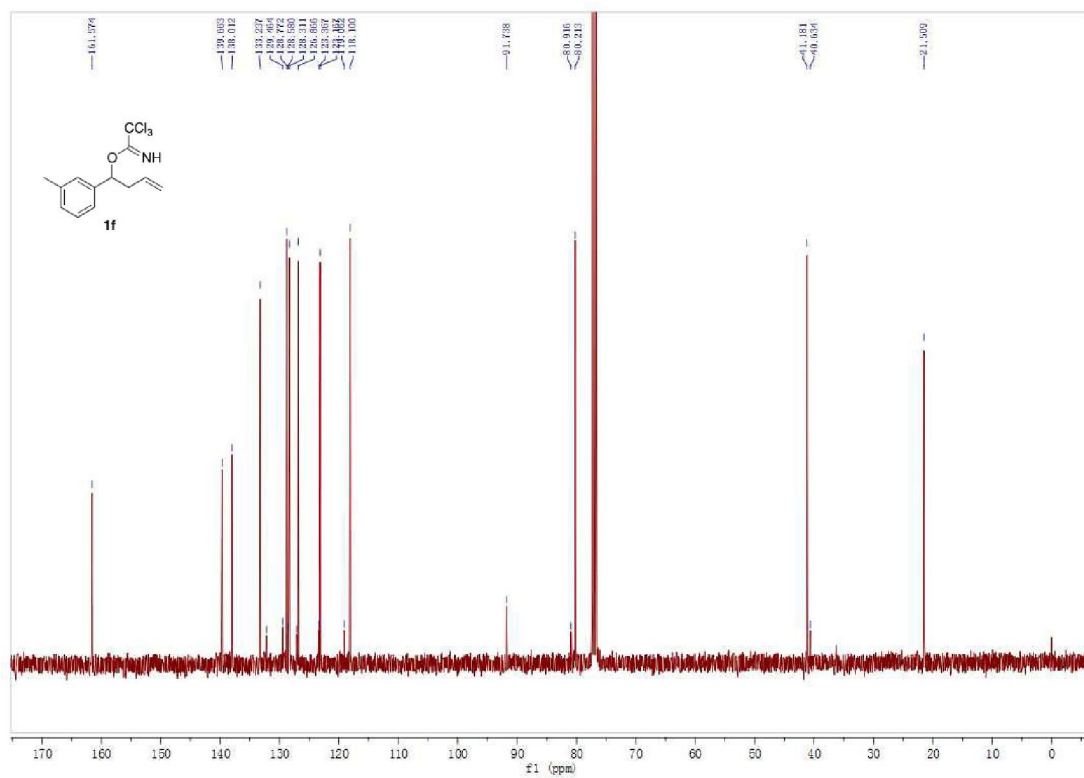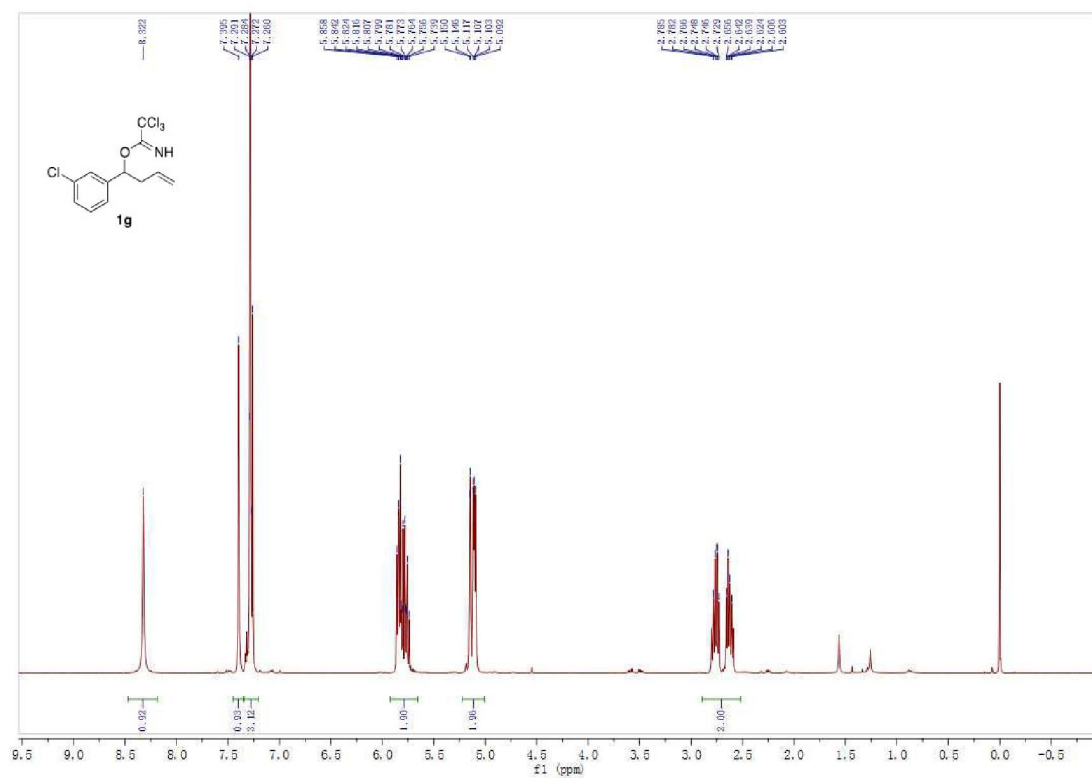

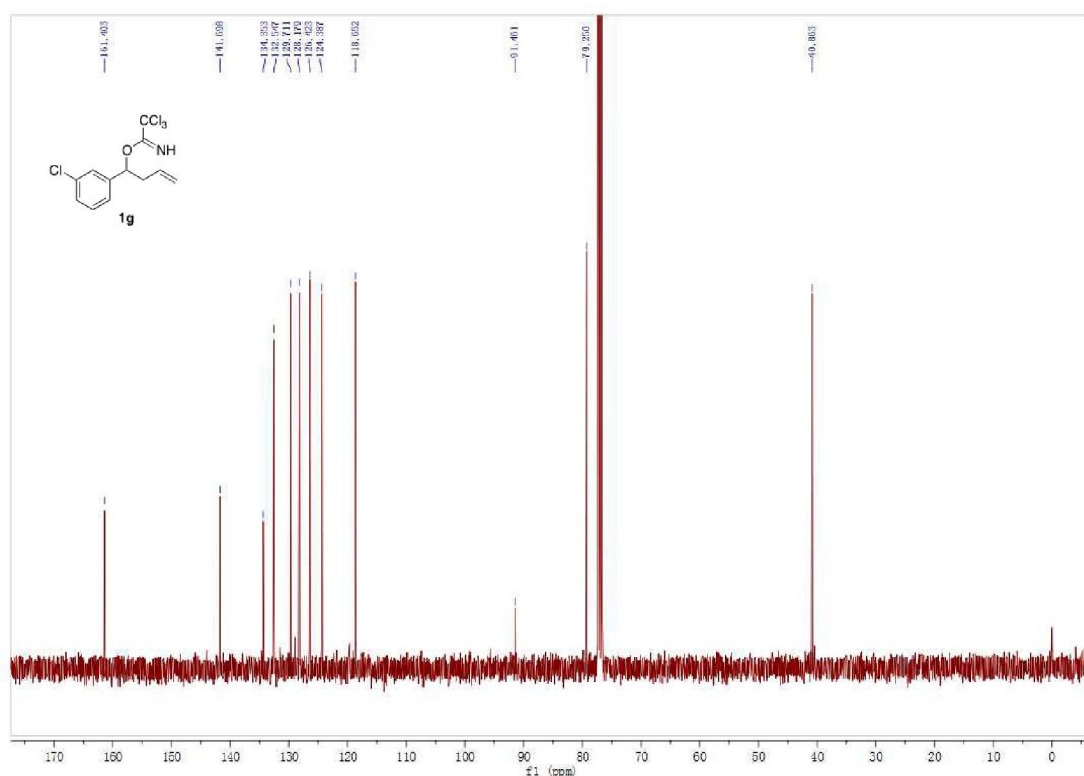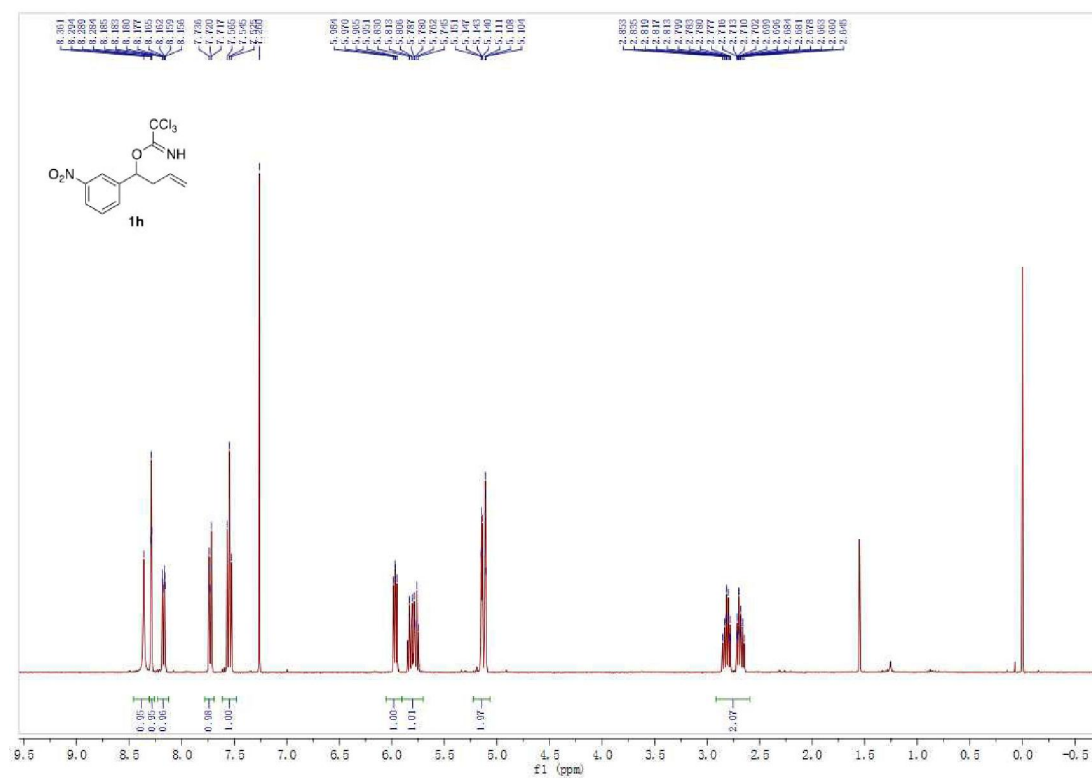

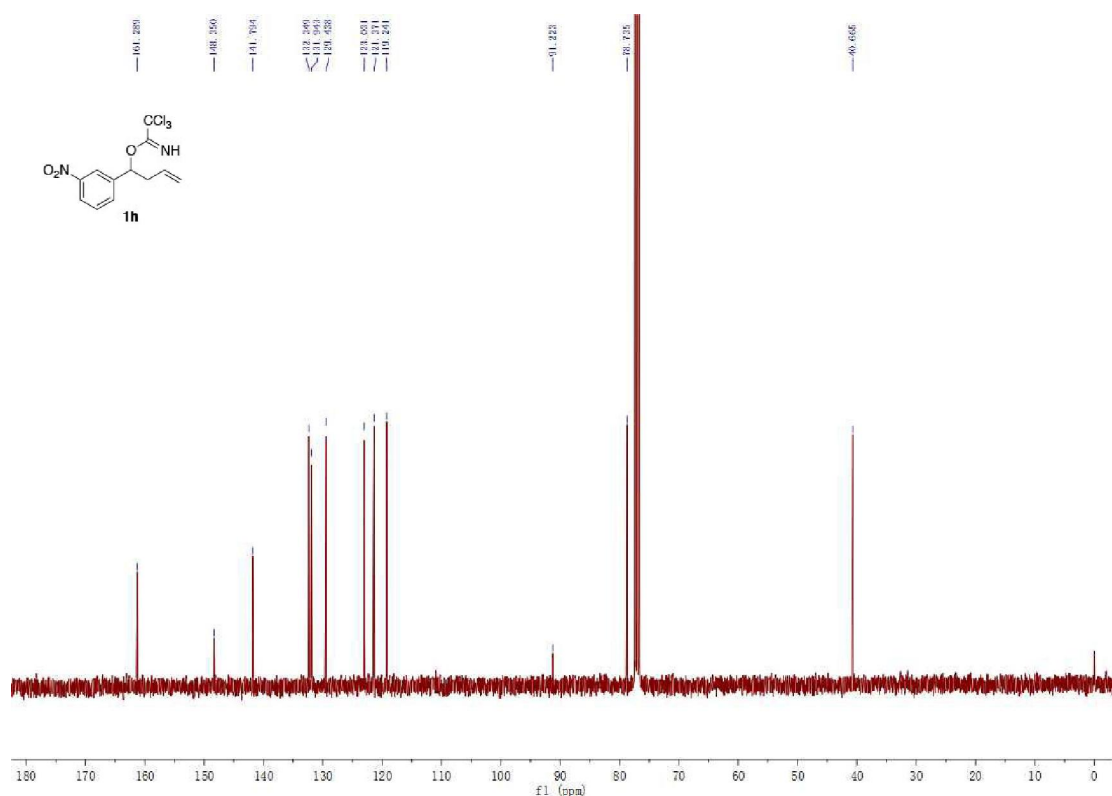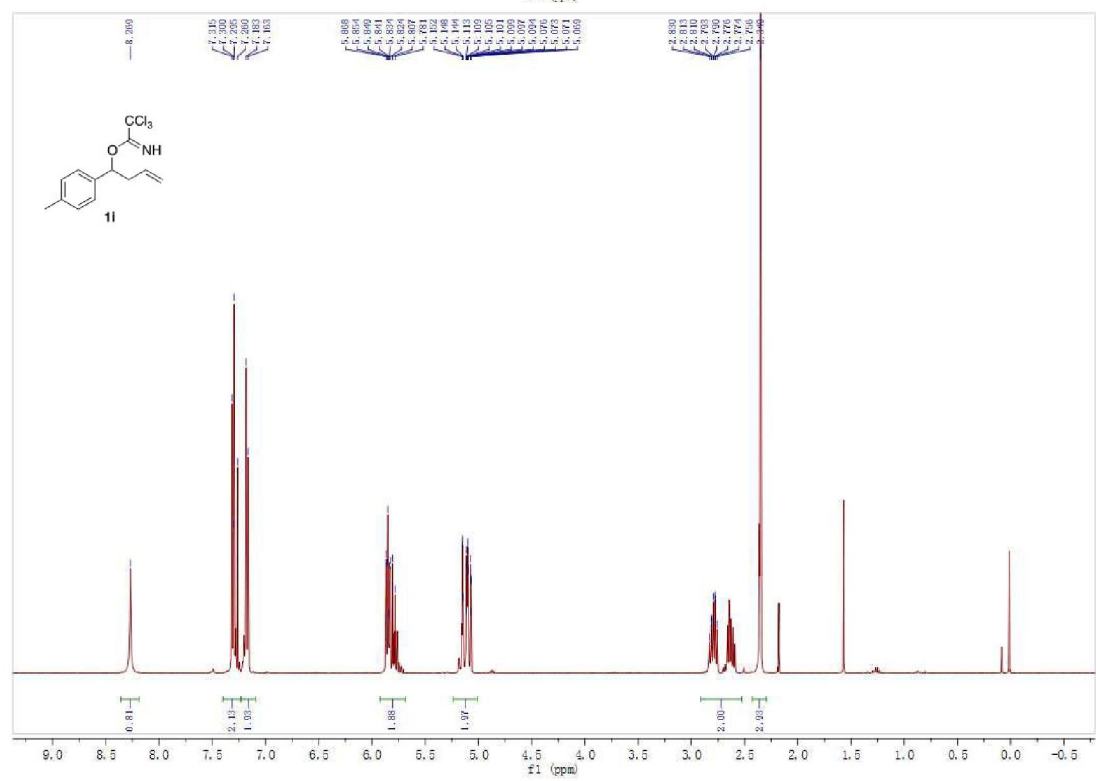

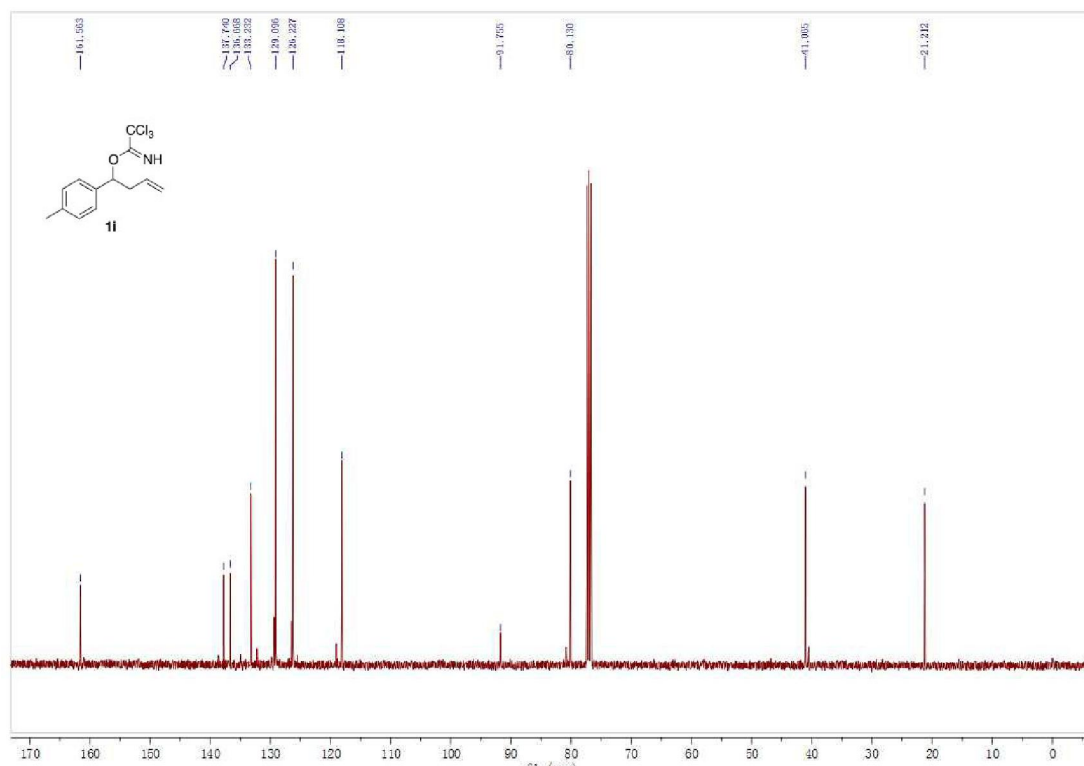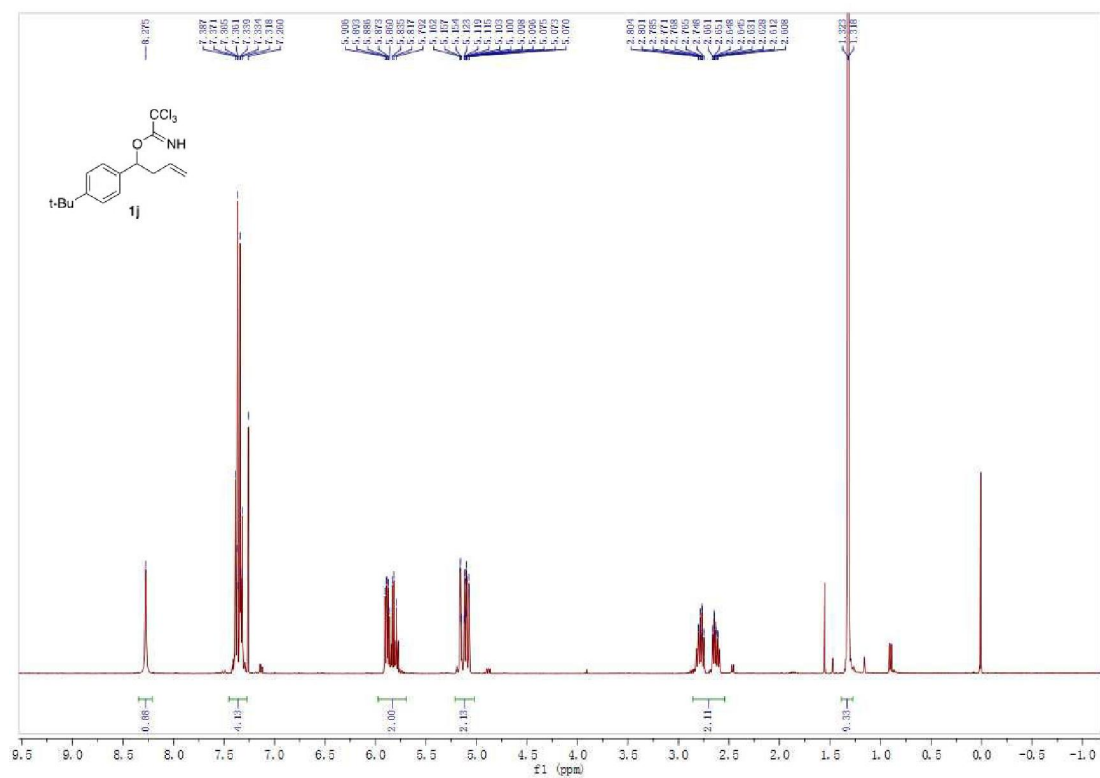



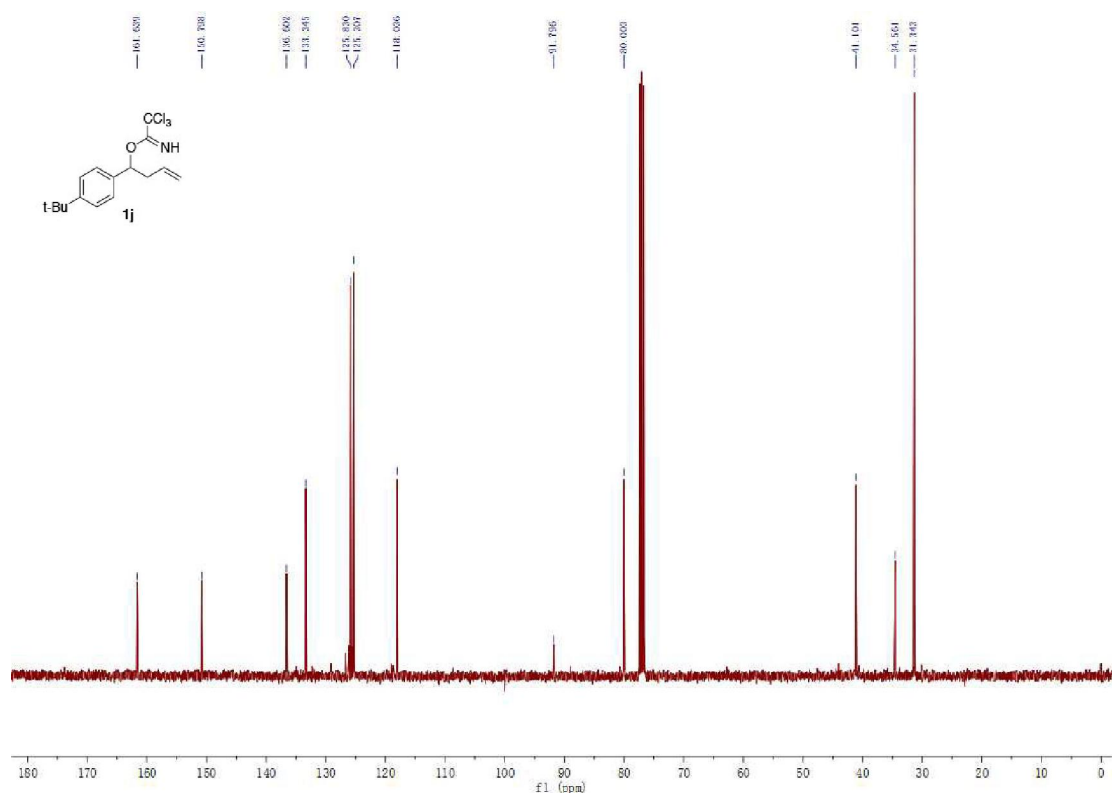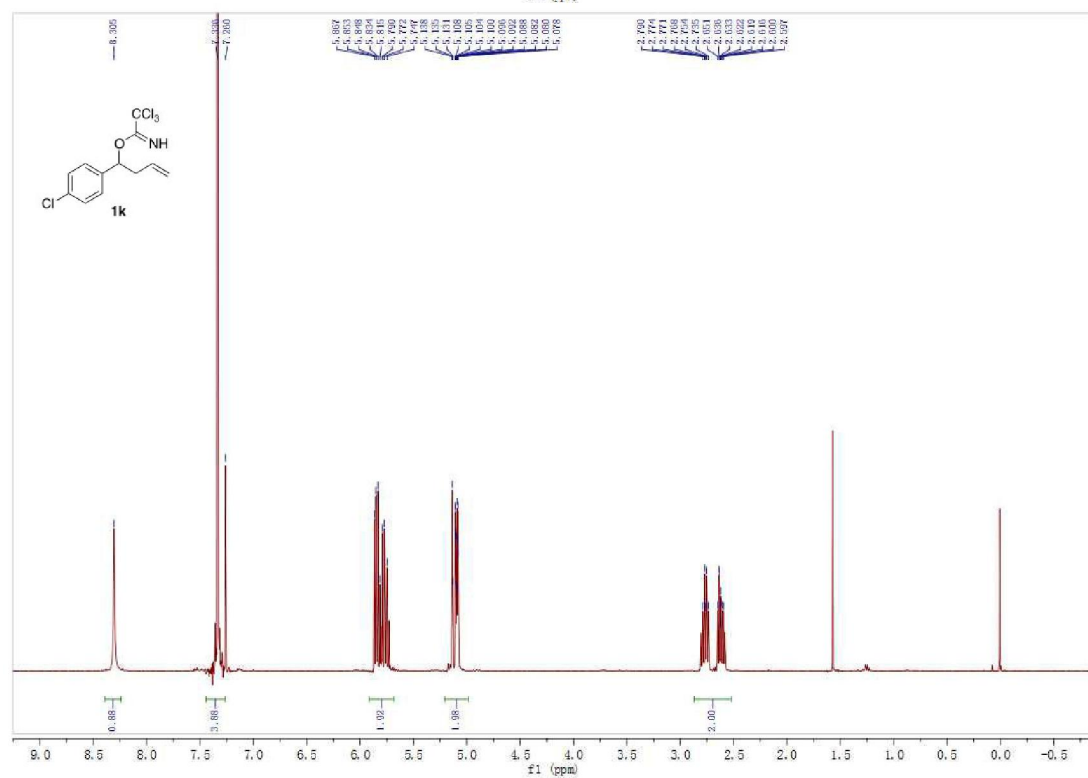

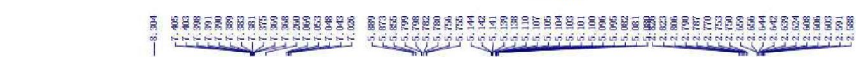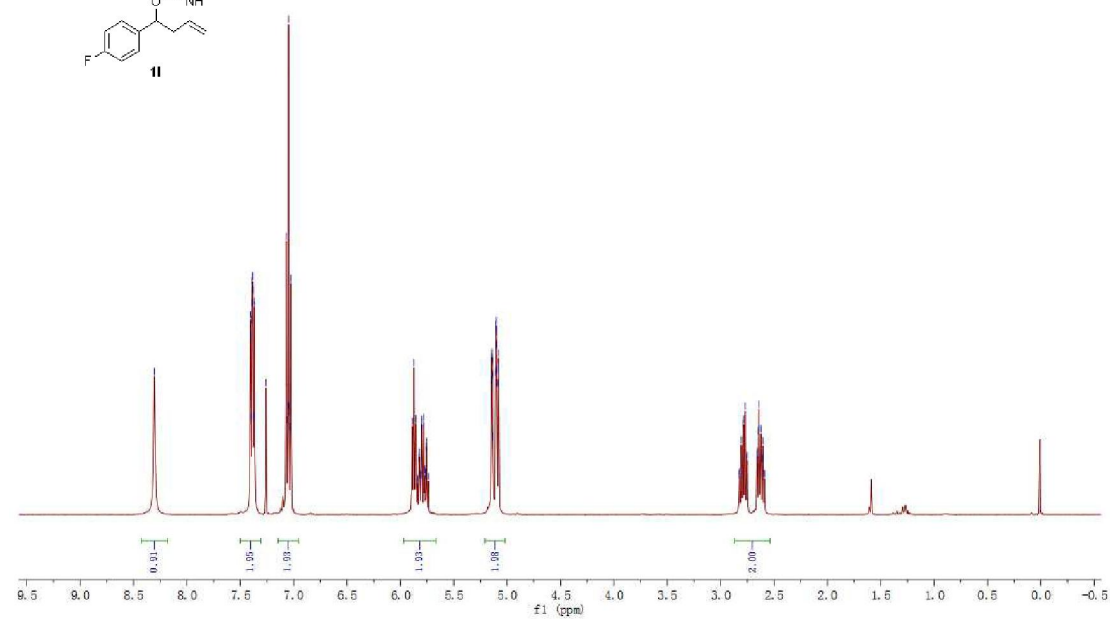

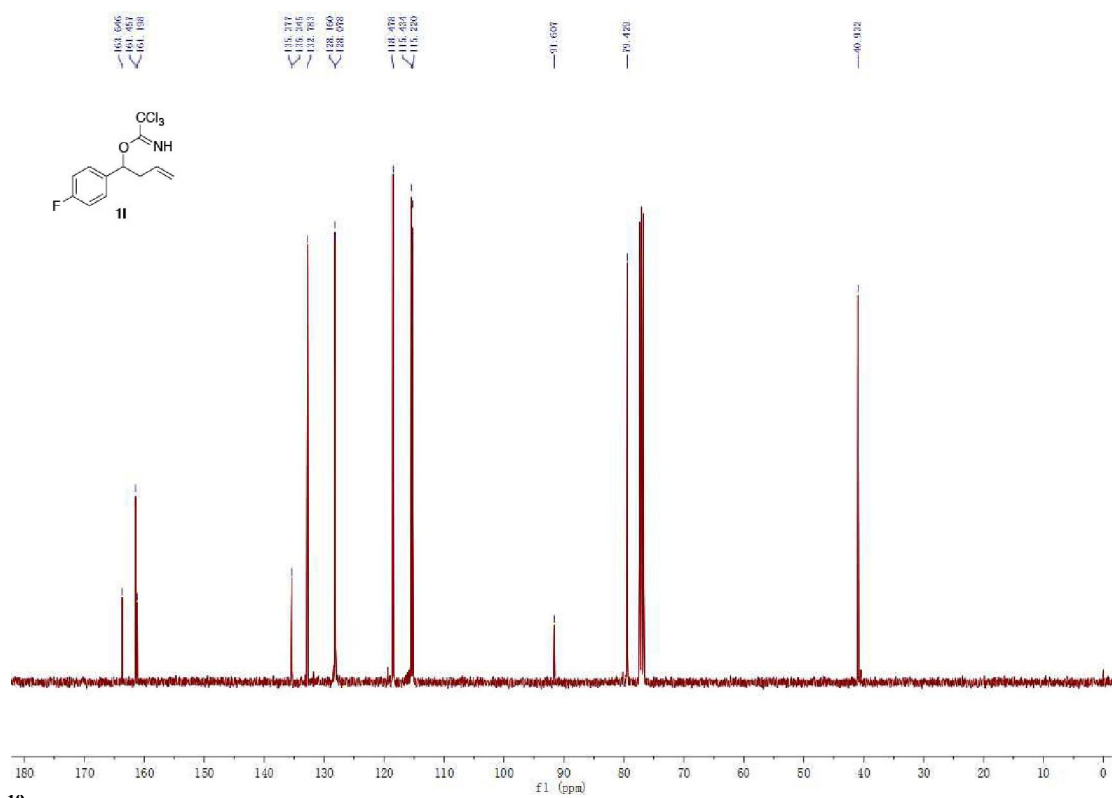

**<sup>19</sup>F NMR (376 MHz, CDCl<sub>3</sub>)**

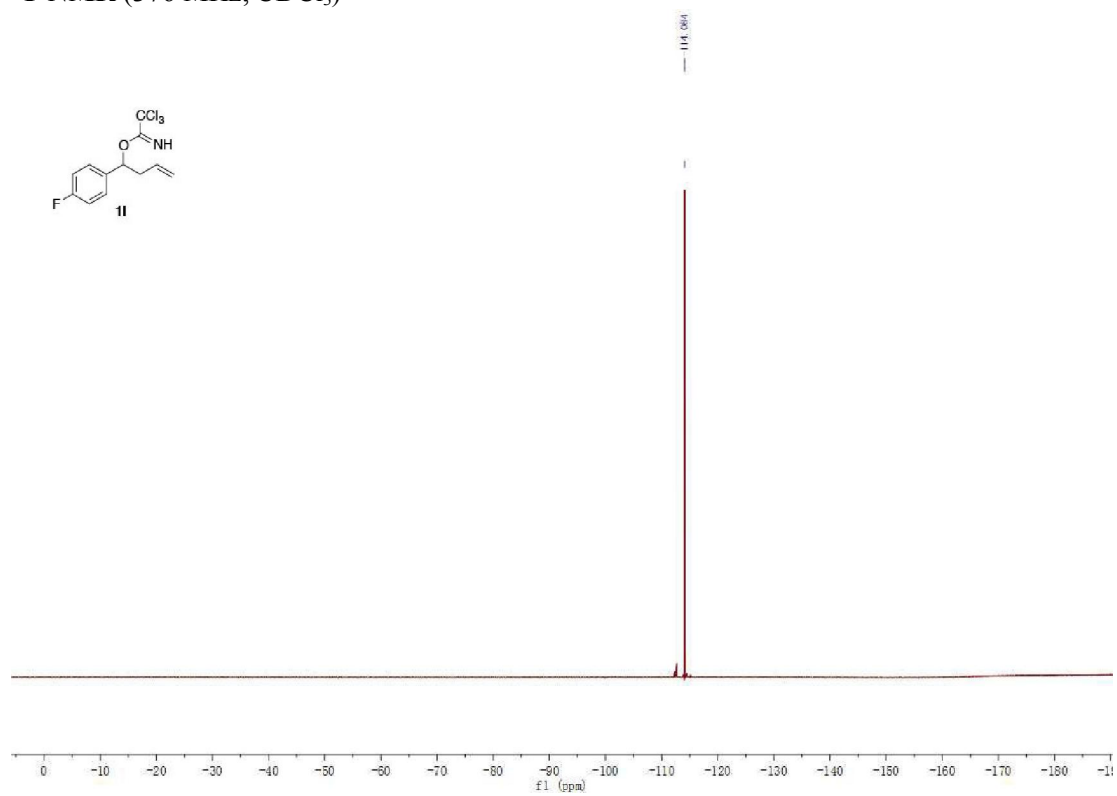

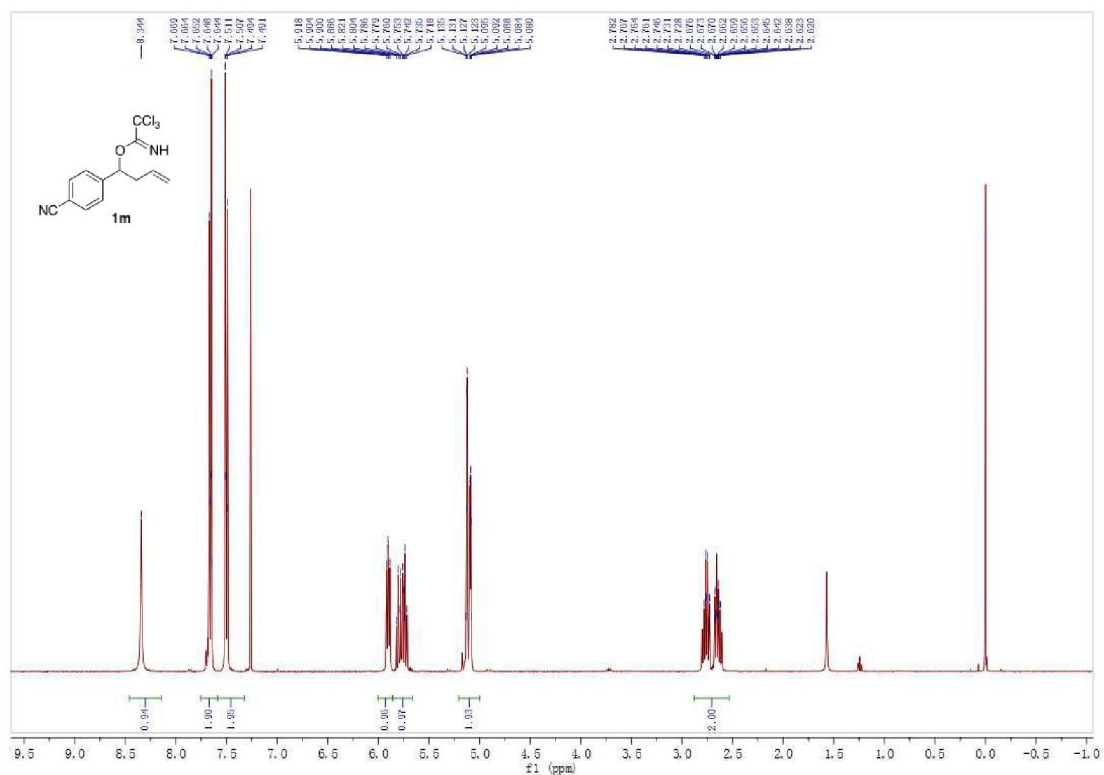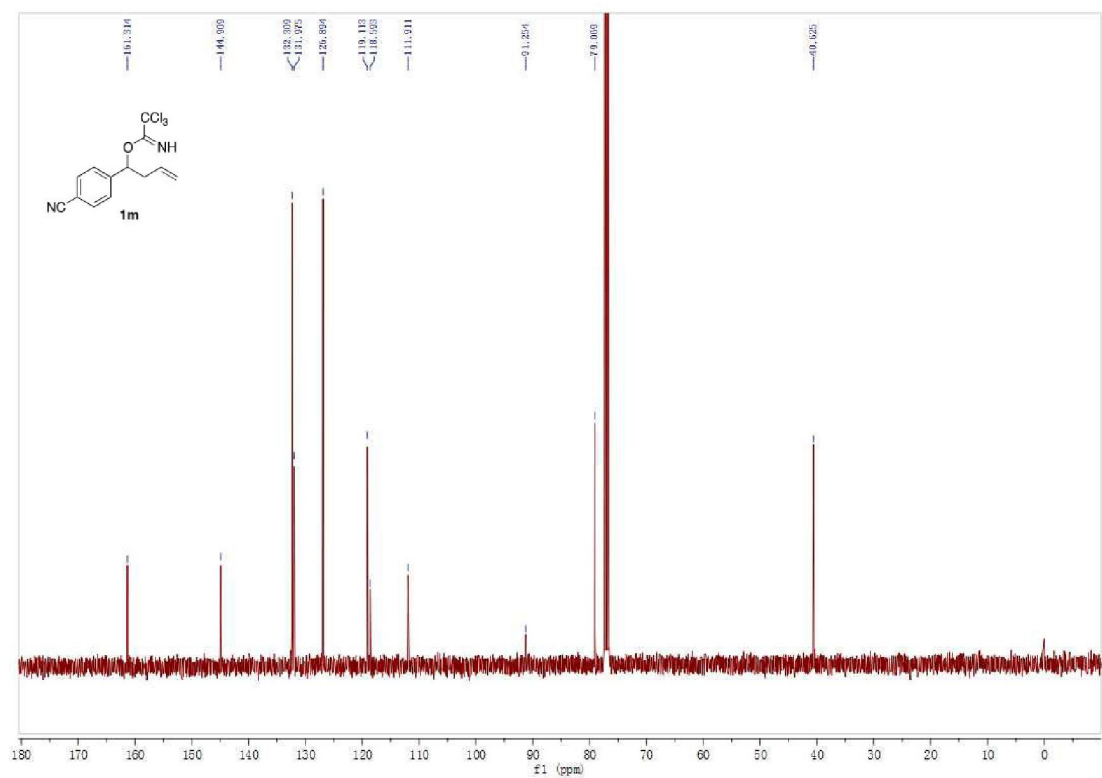

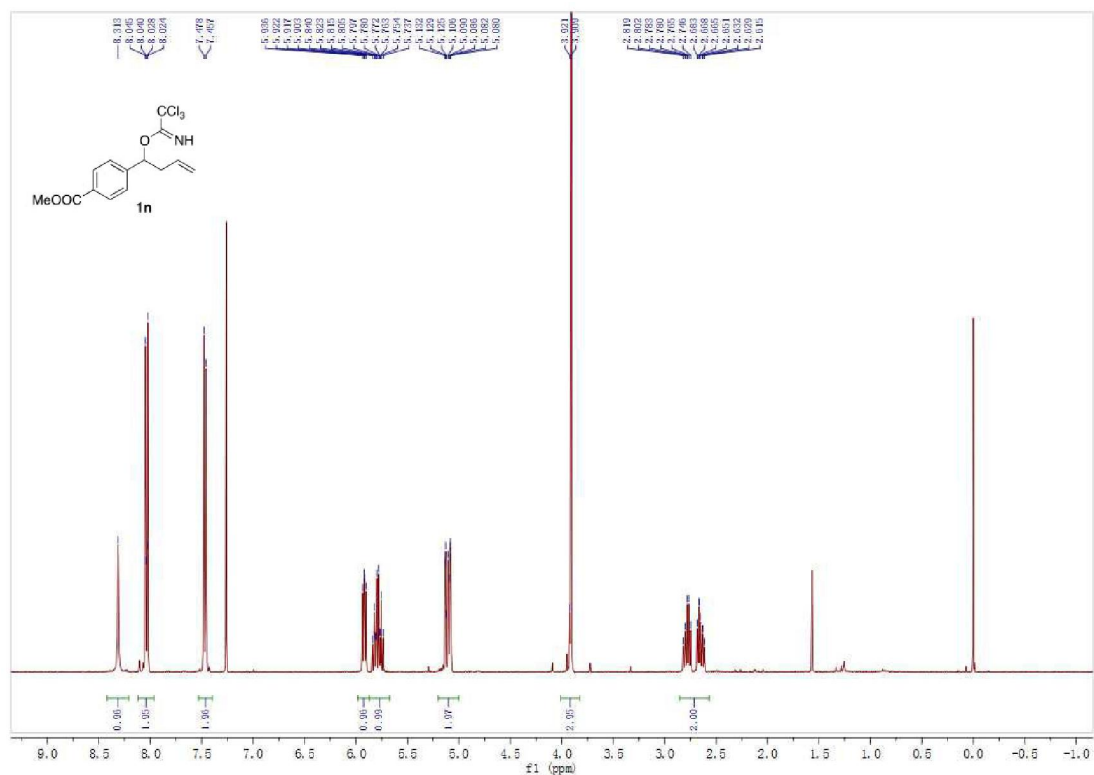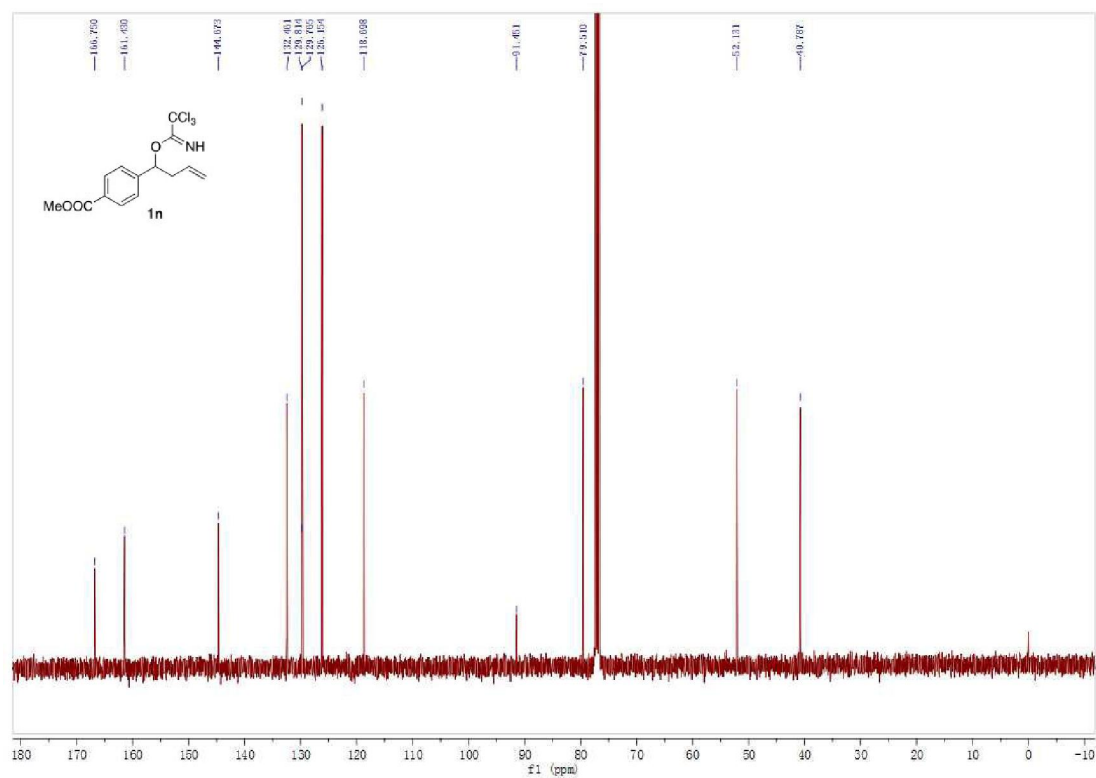

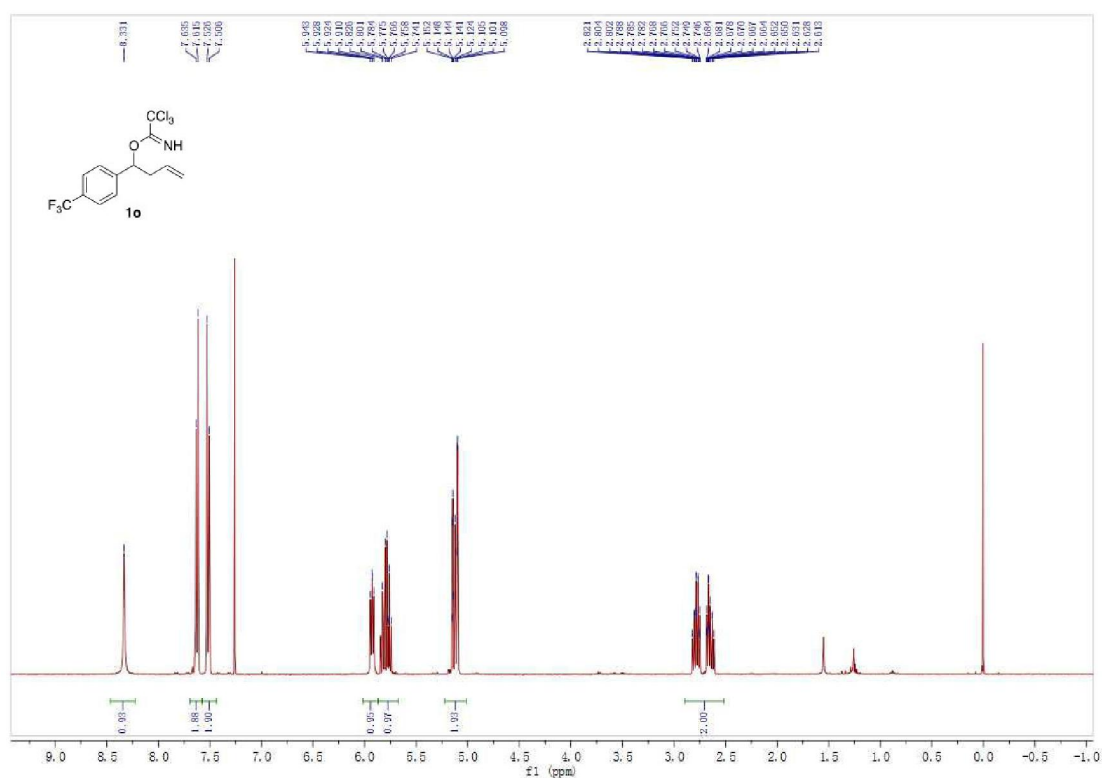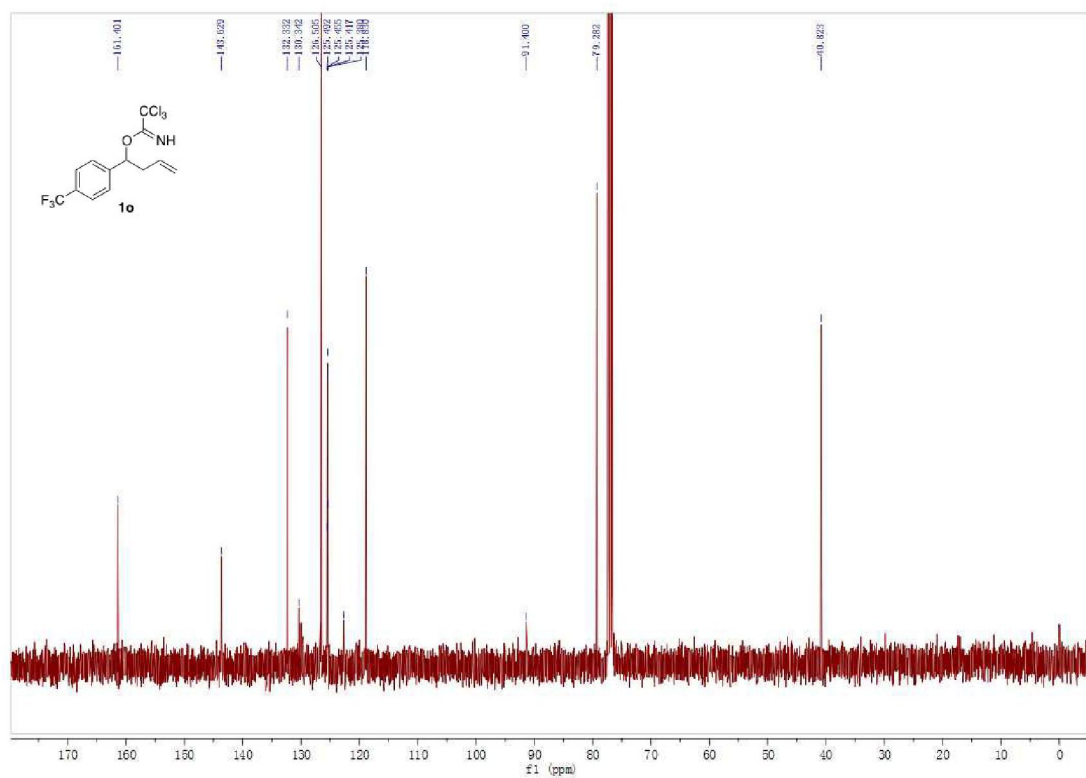

**<sup>19</sup>F NMR** (376 MHz, CDCl<sub>3</sub>)

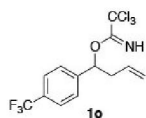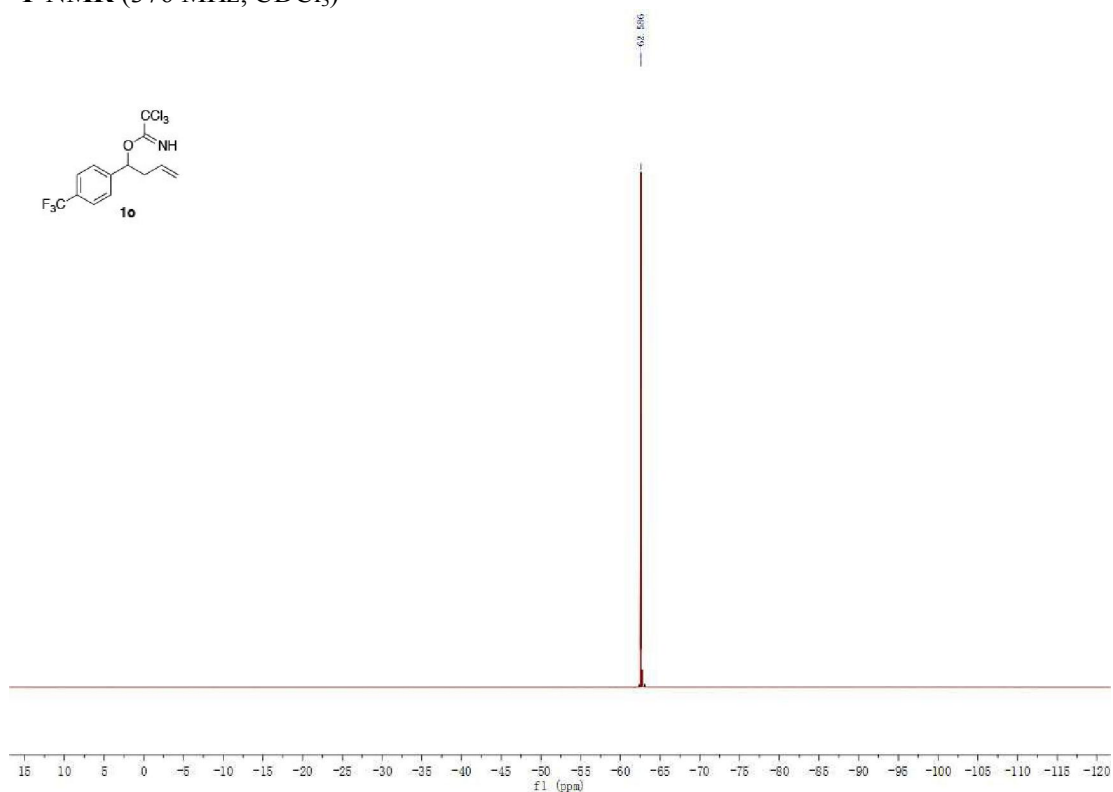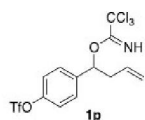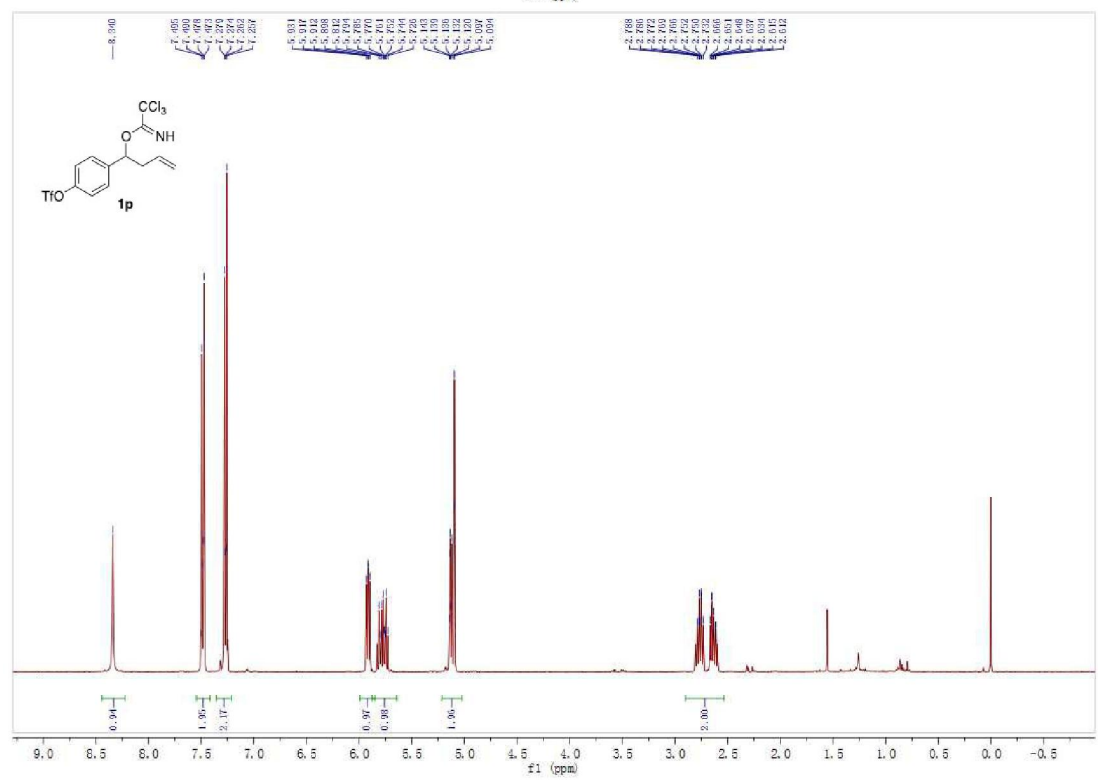

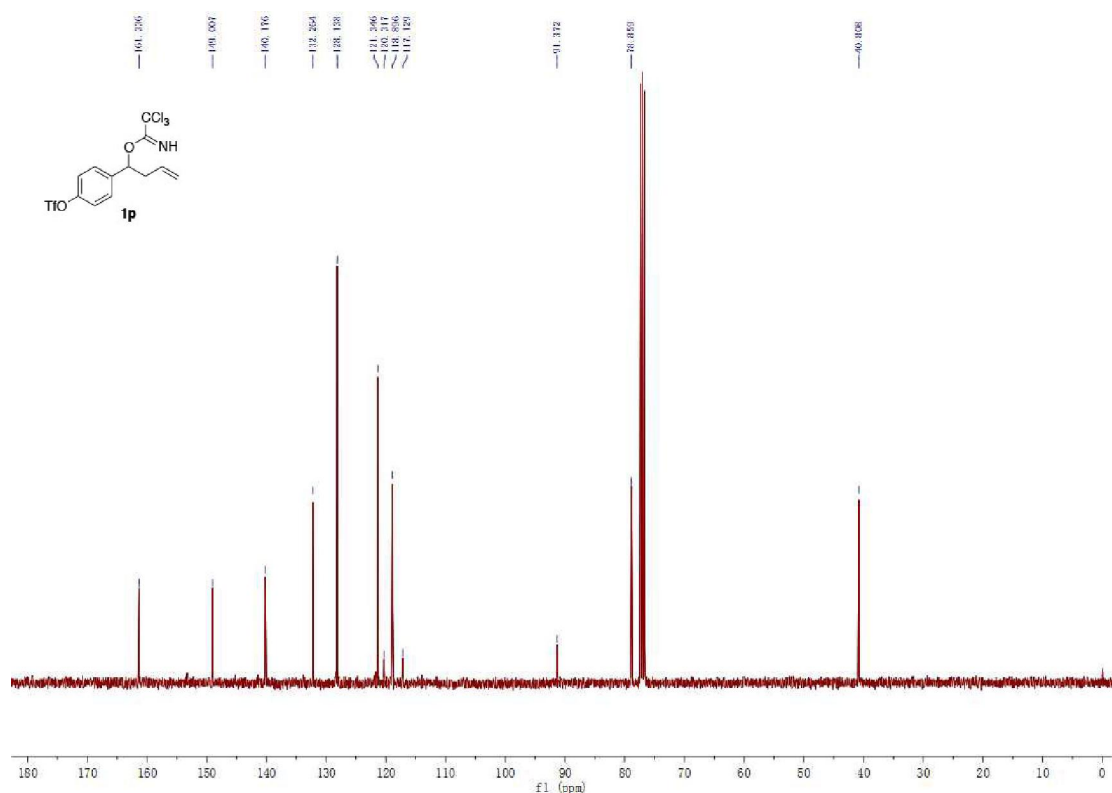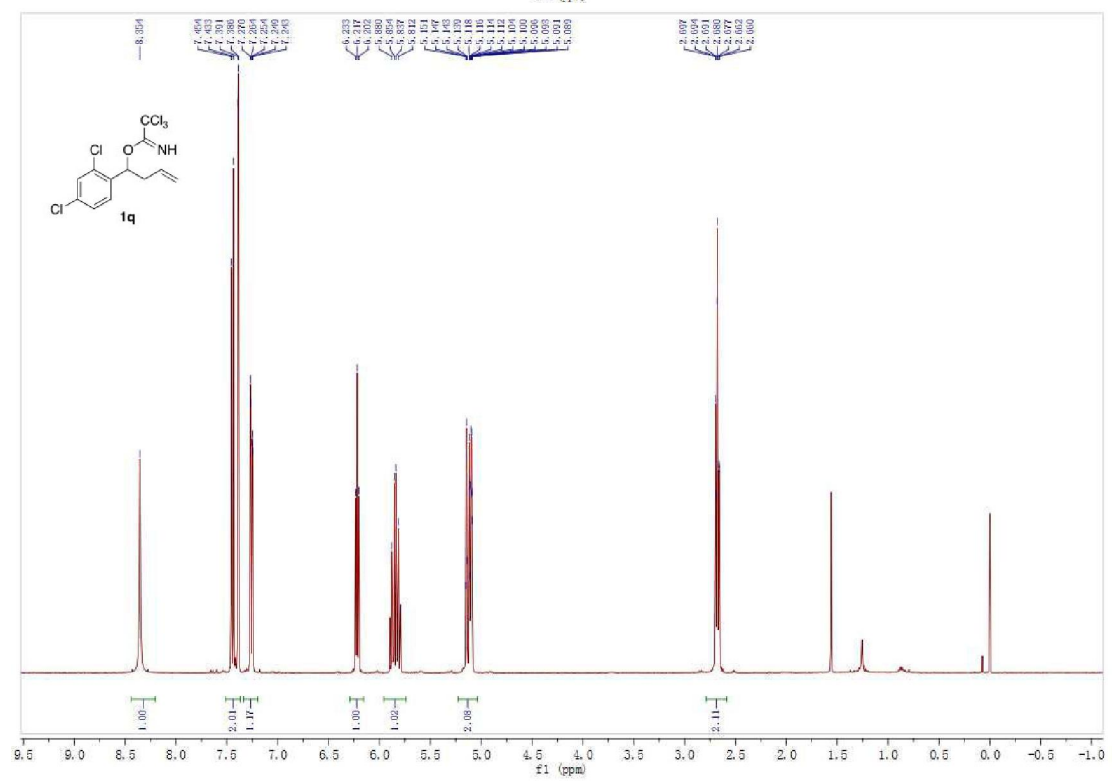



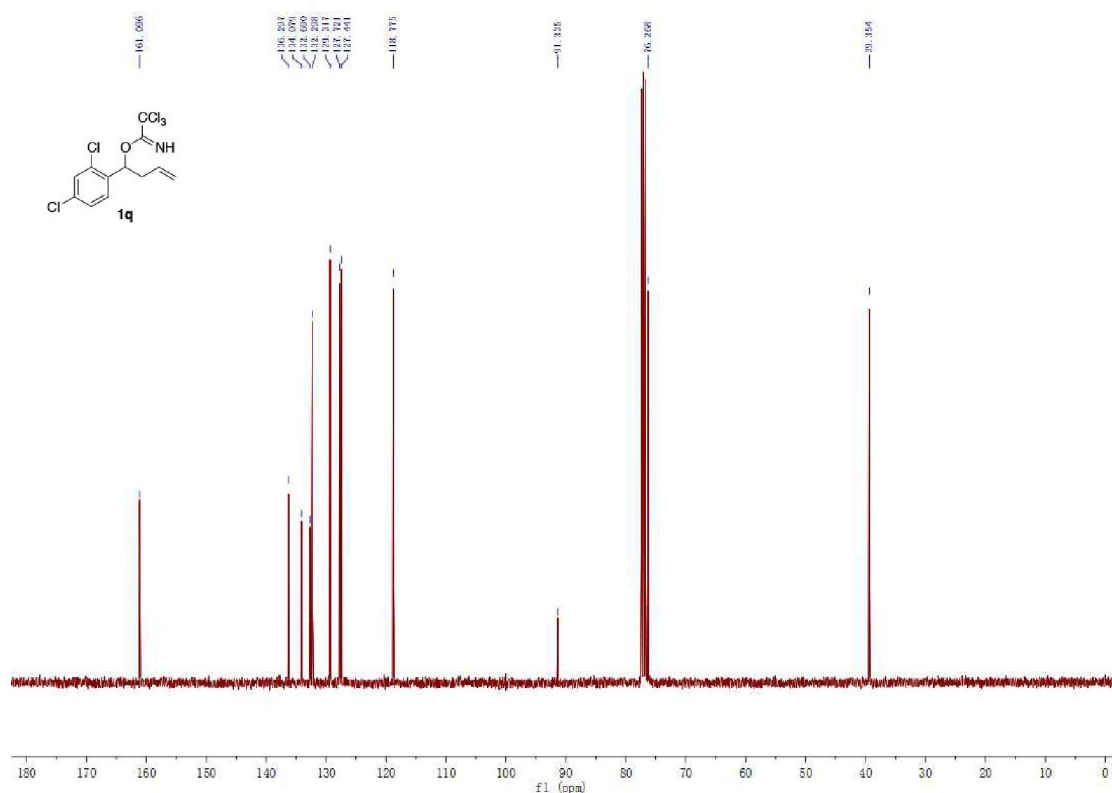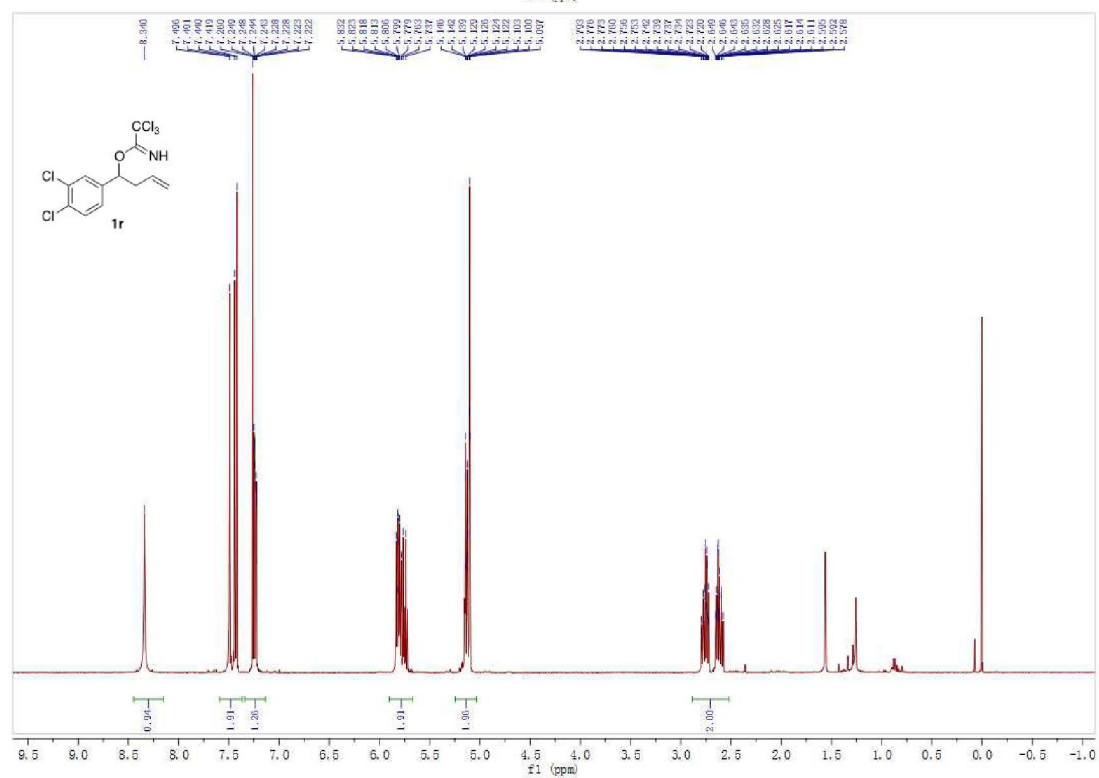

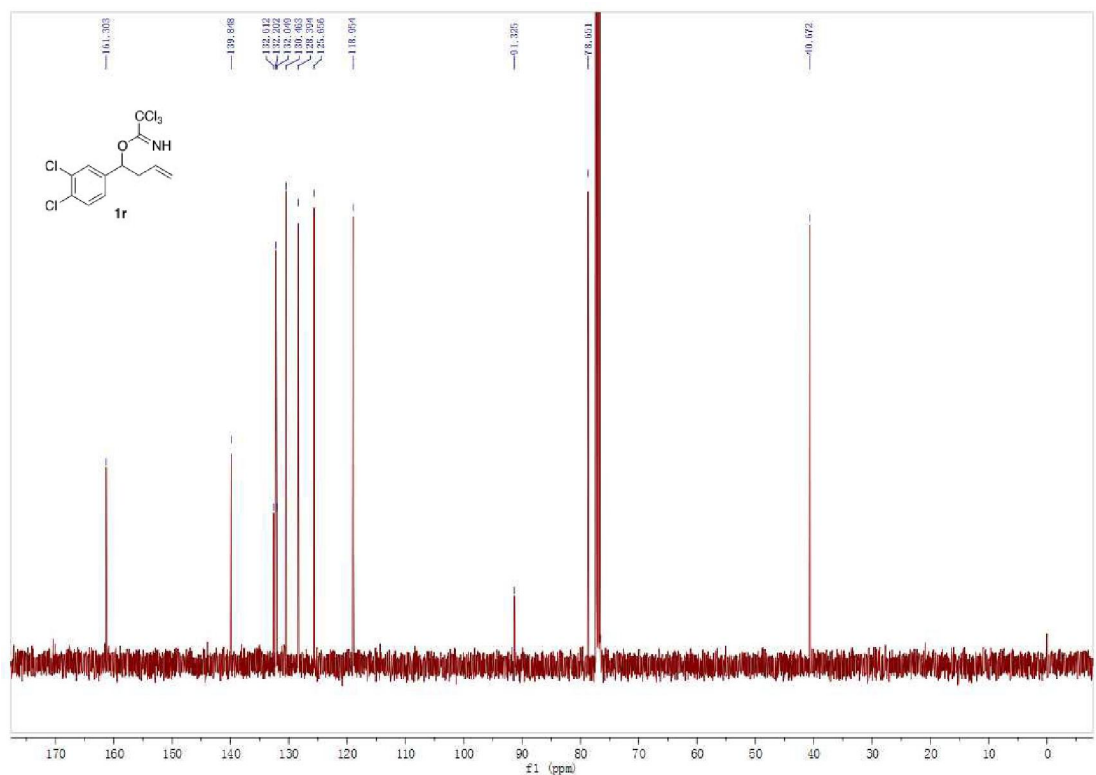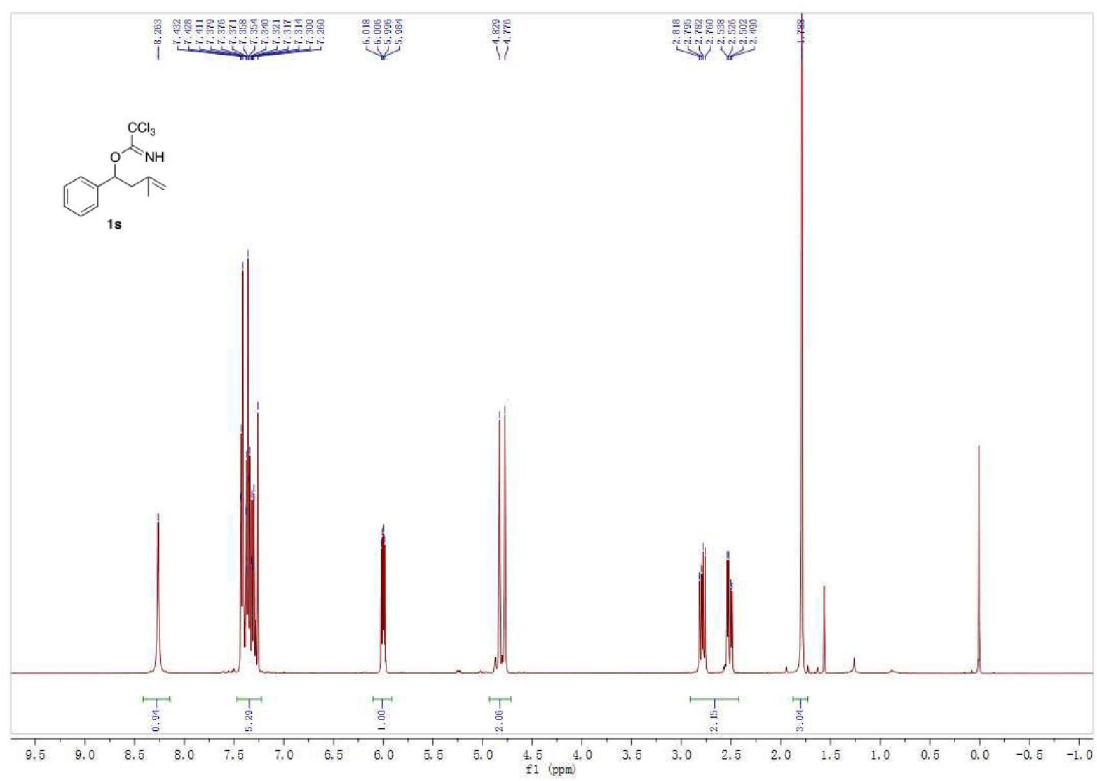

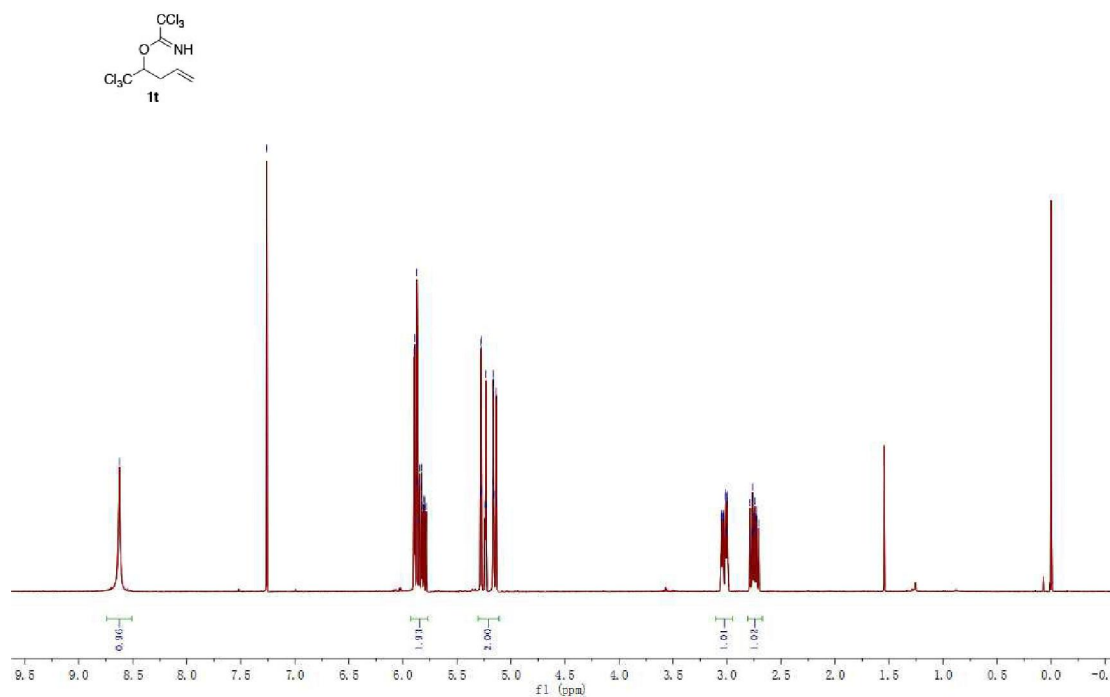

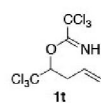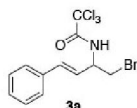

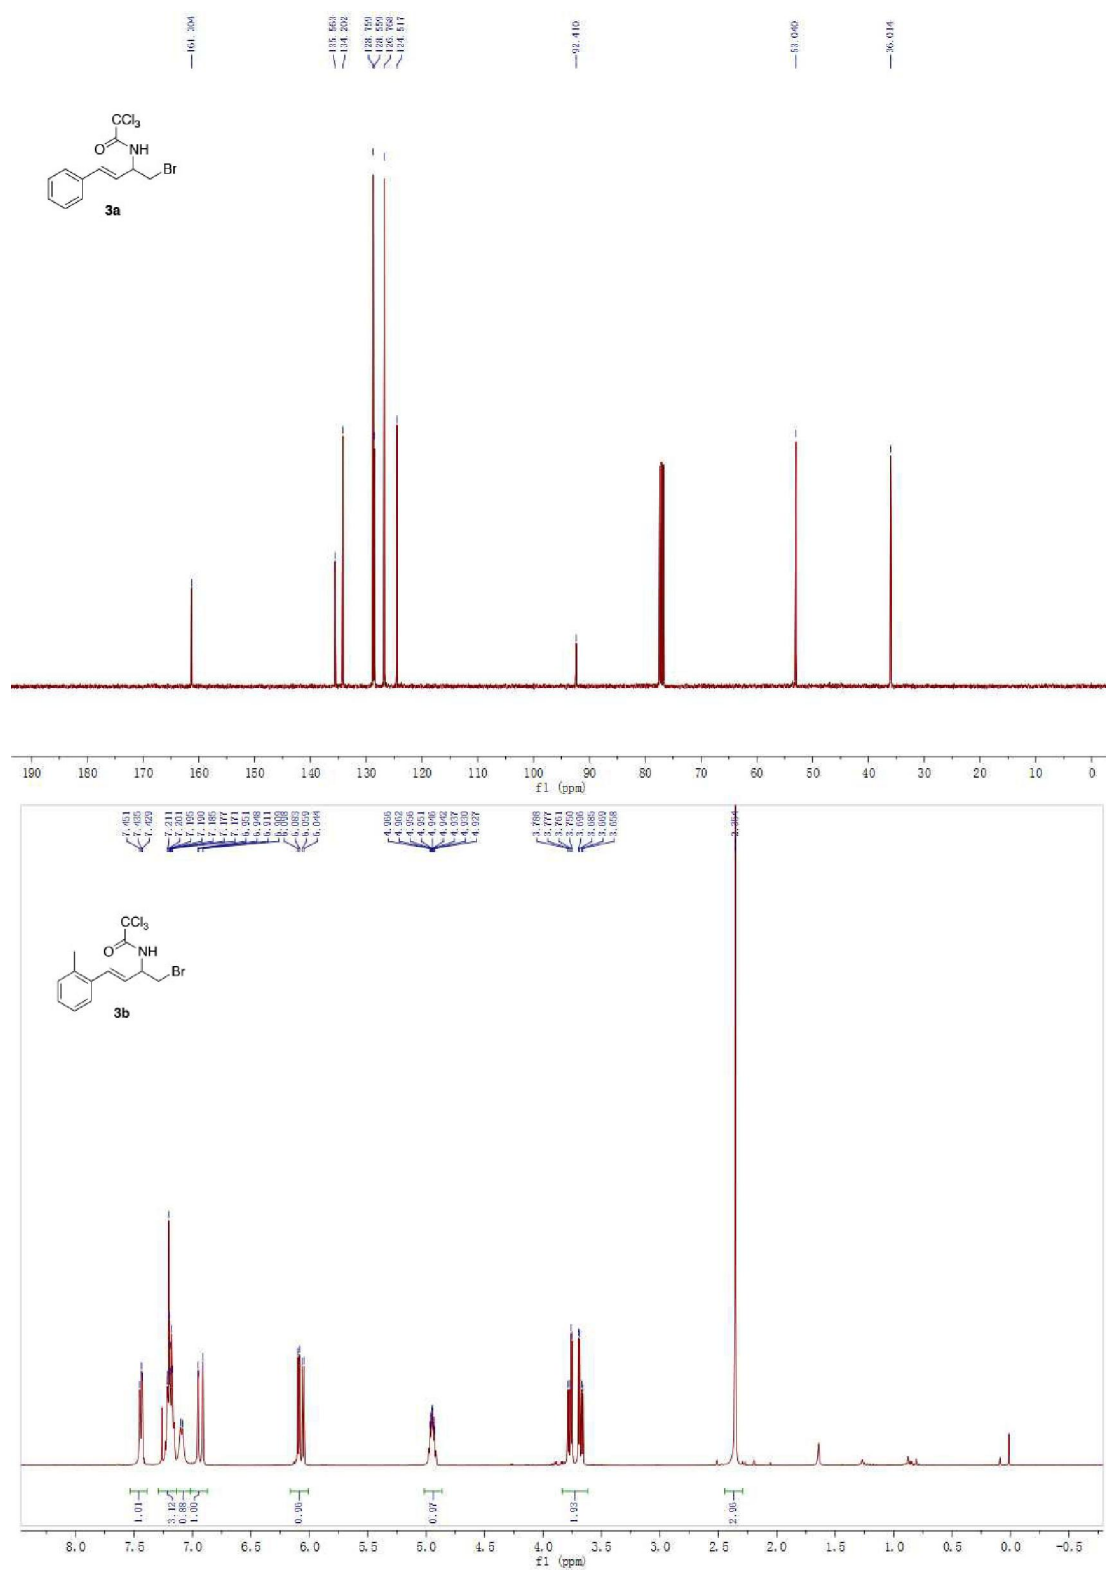

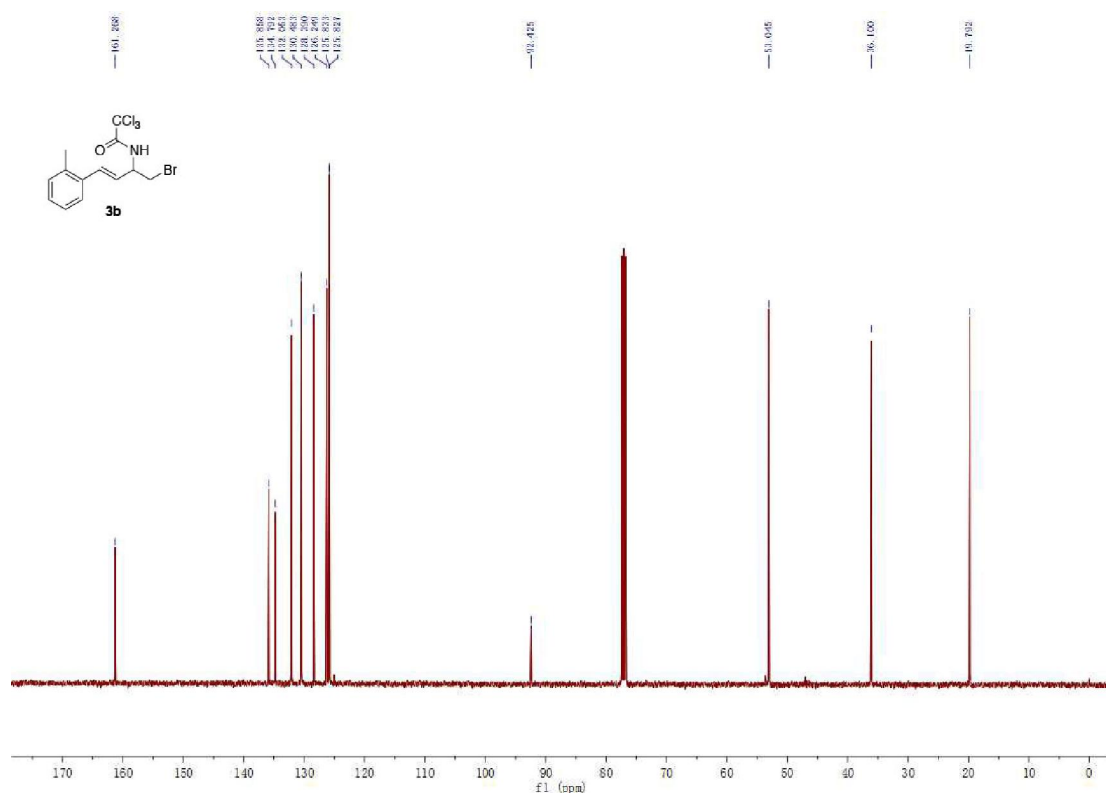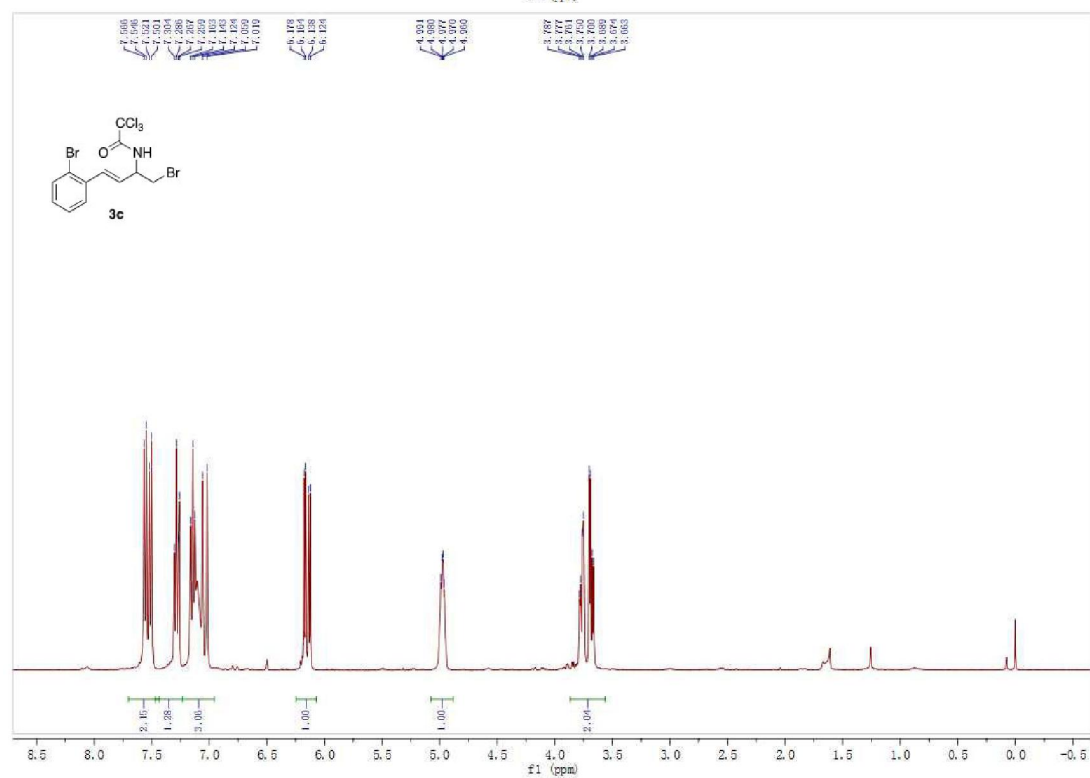

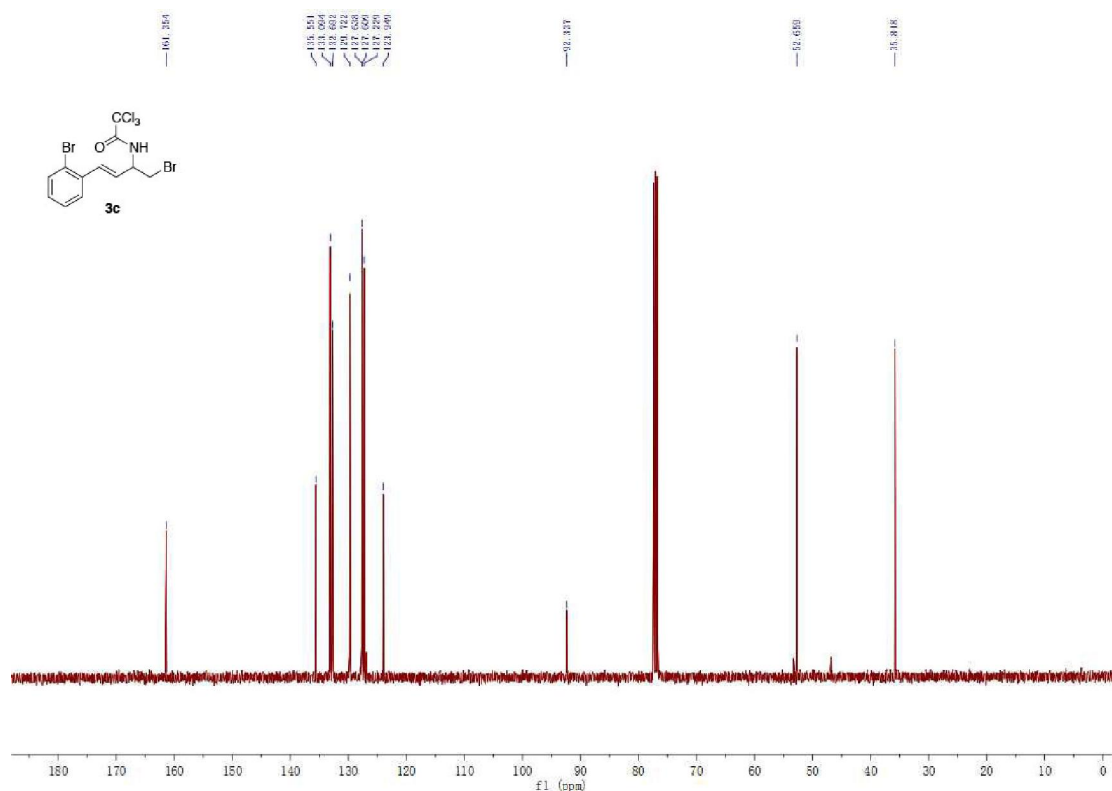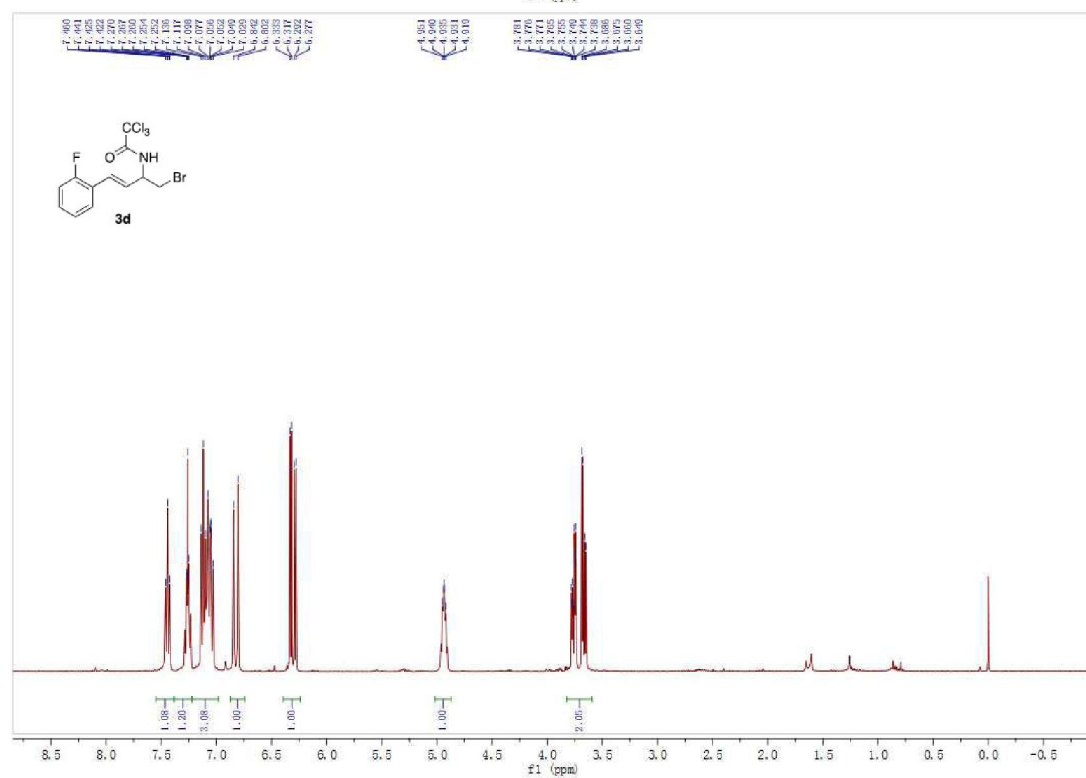

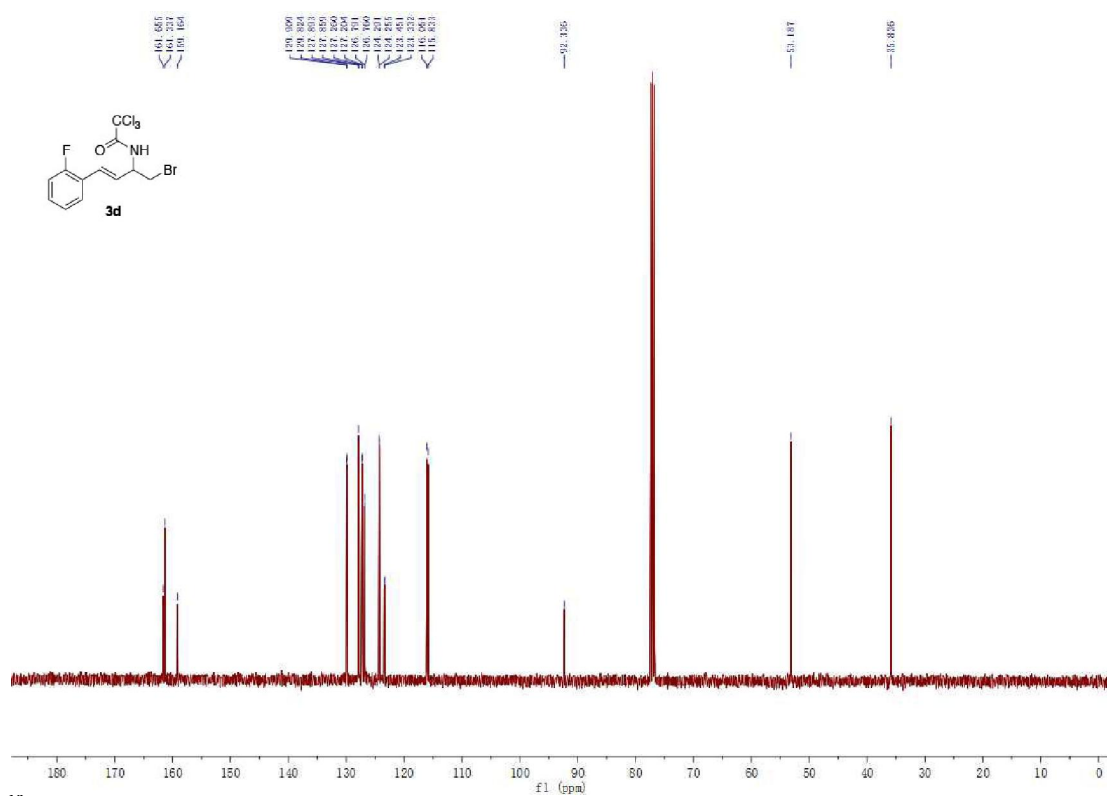

**<sup>19</sup>F NMR (376 MHz, CDCl<sub>3</sub>)**

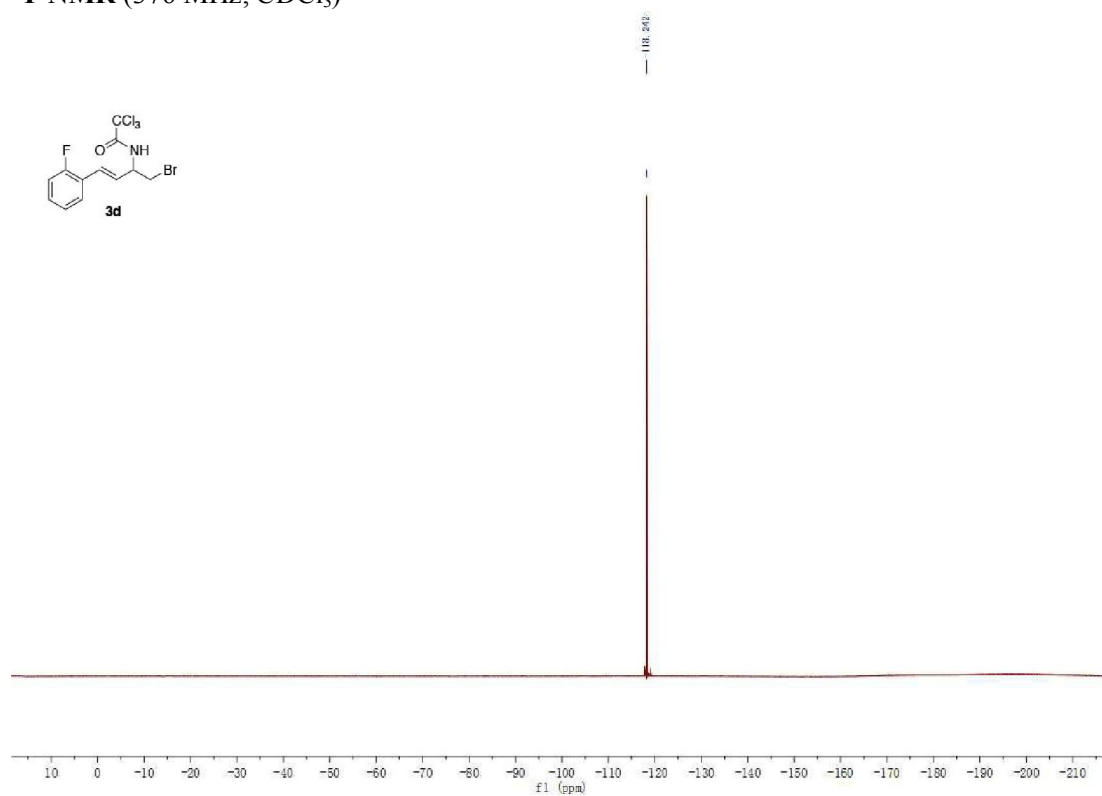



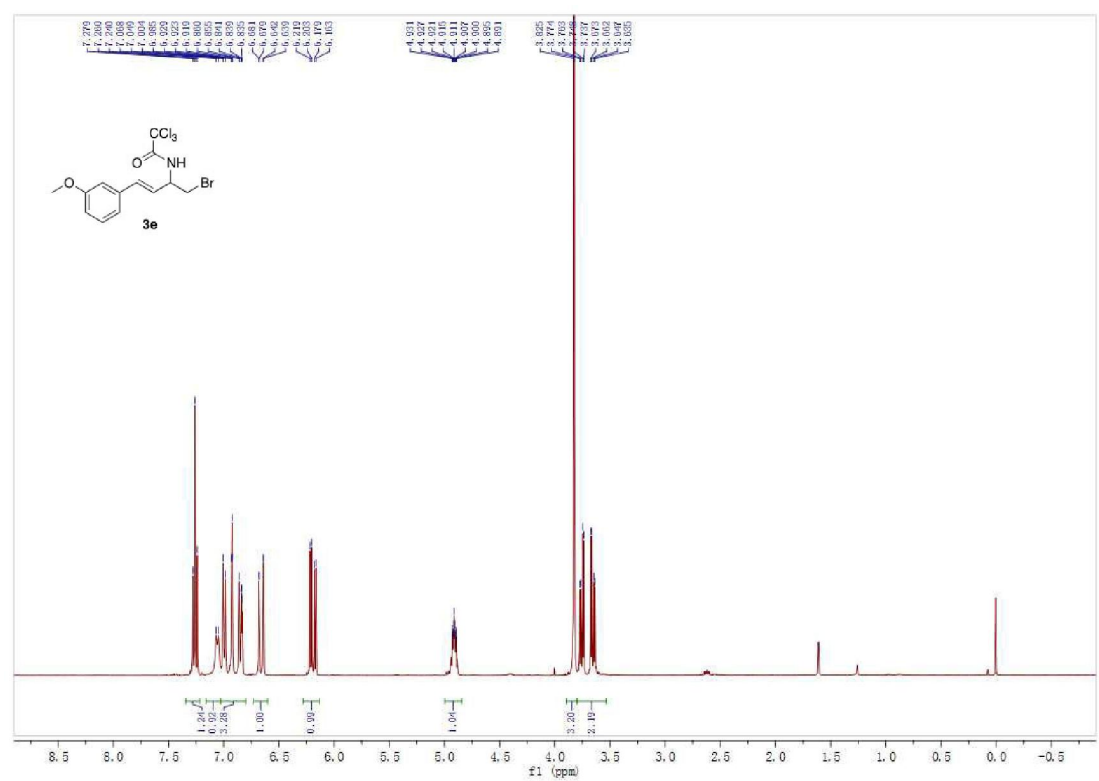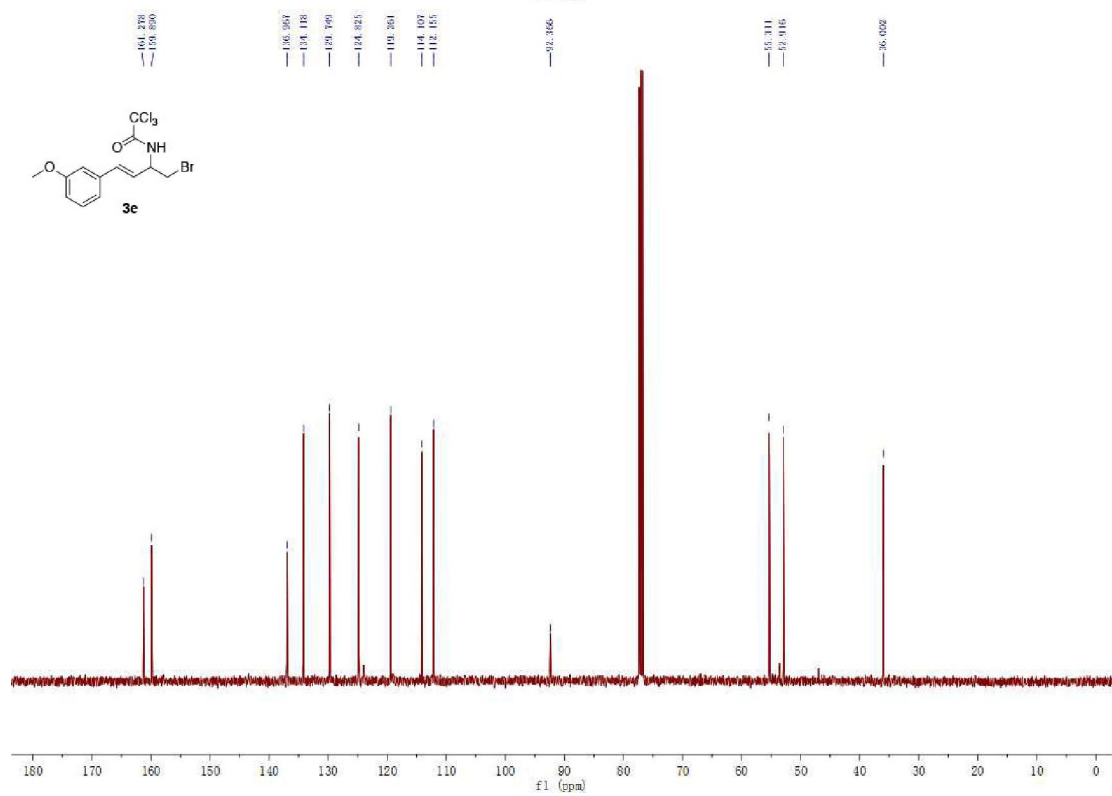

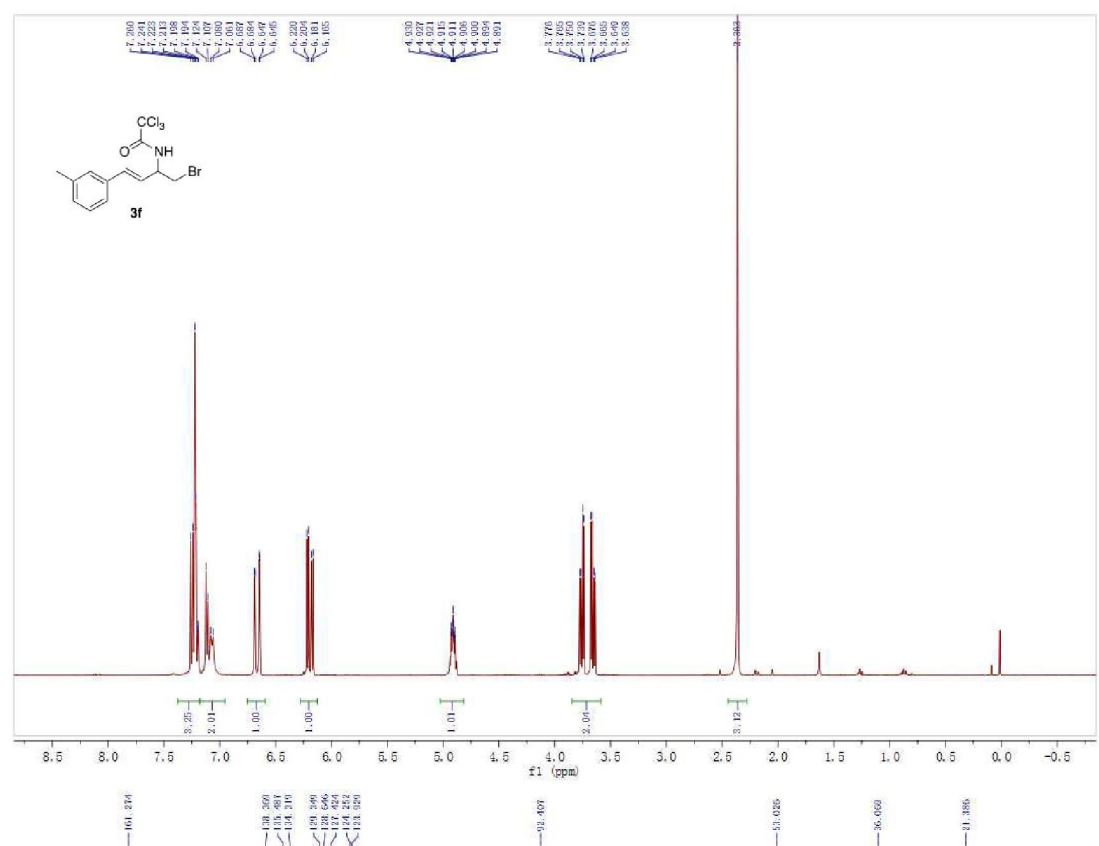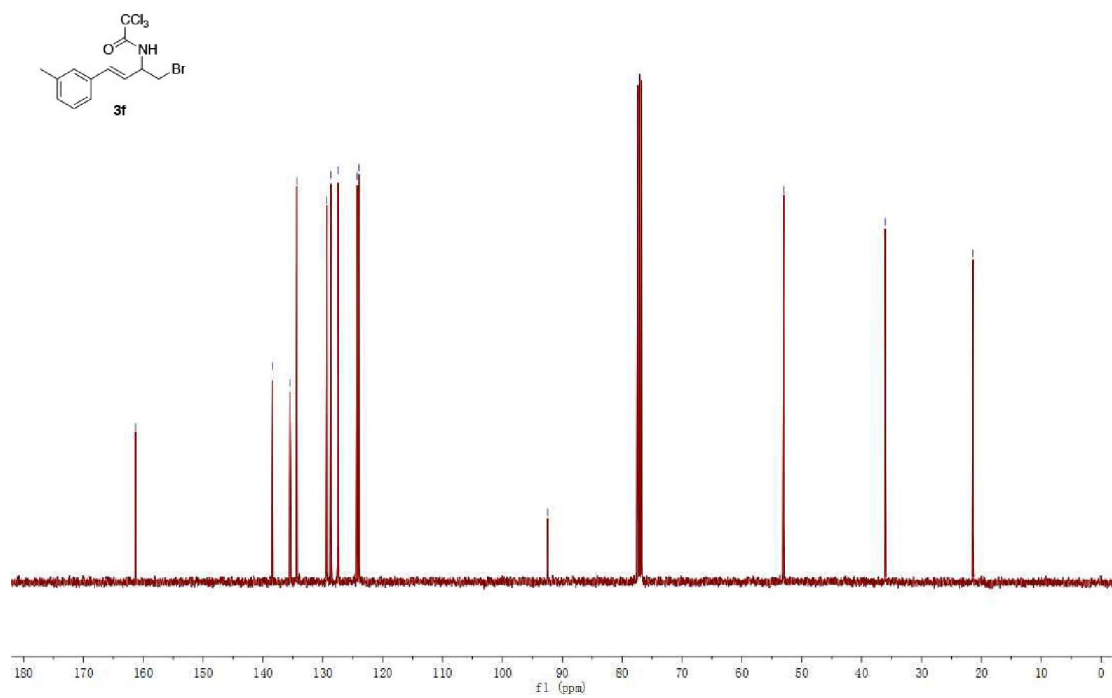

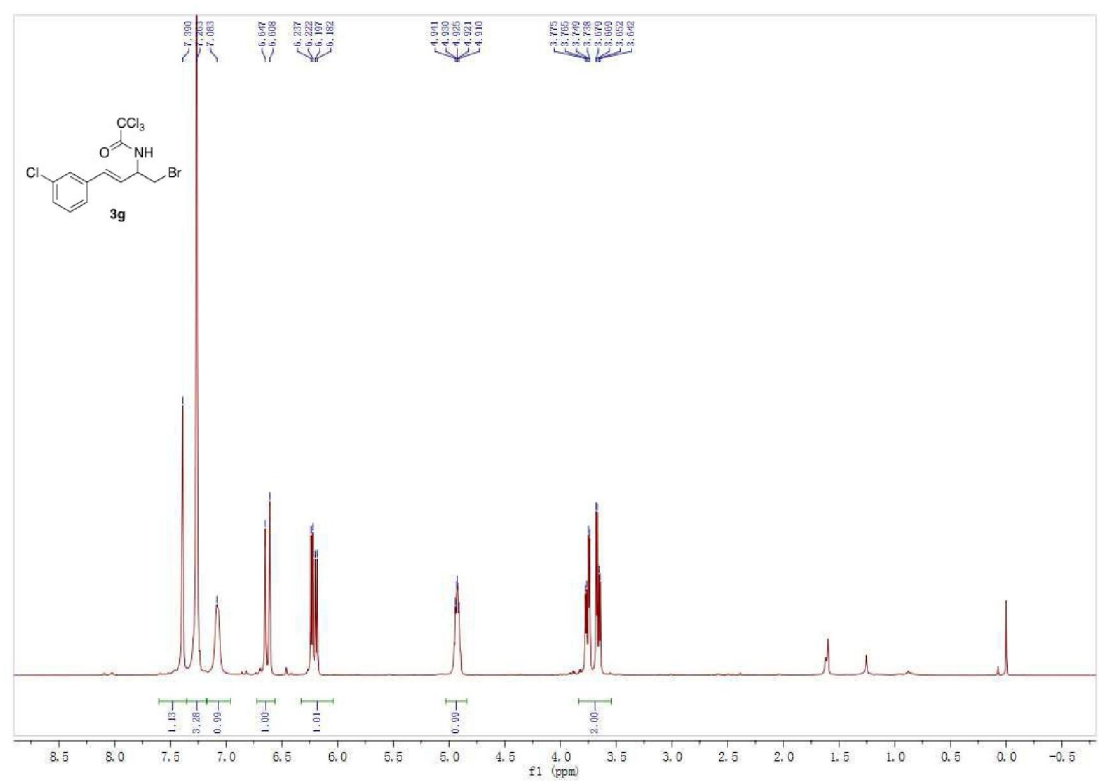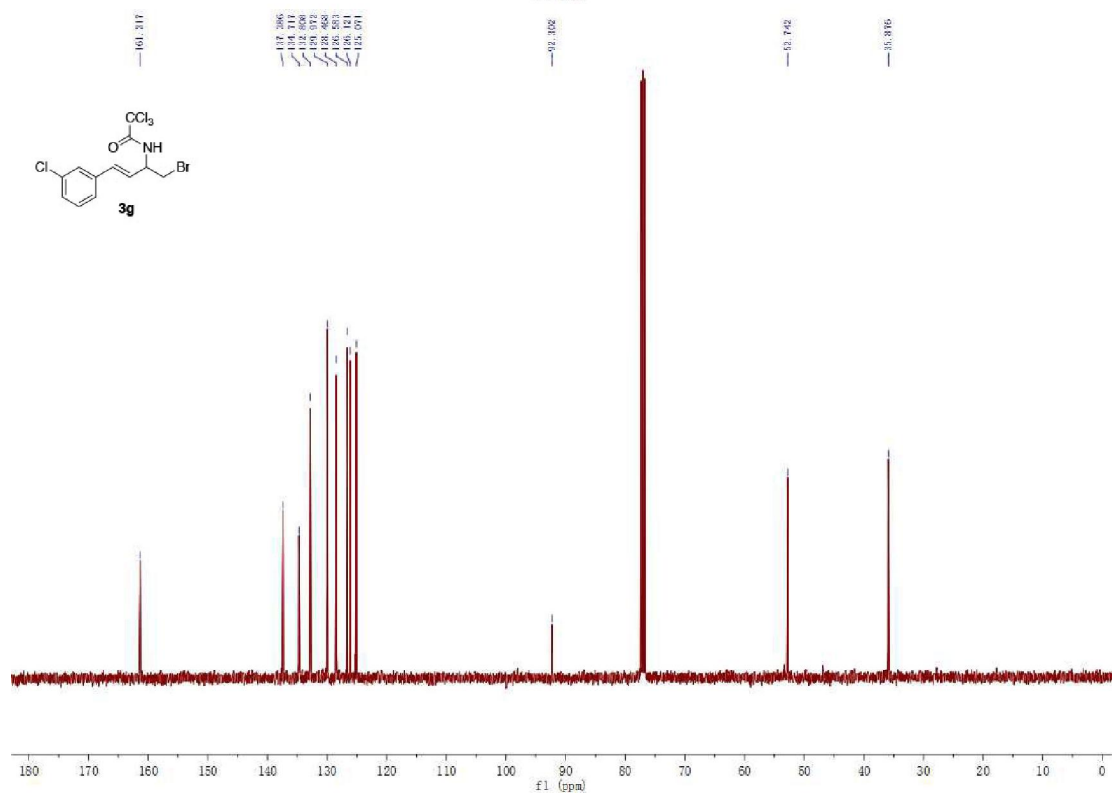

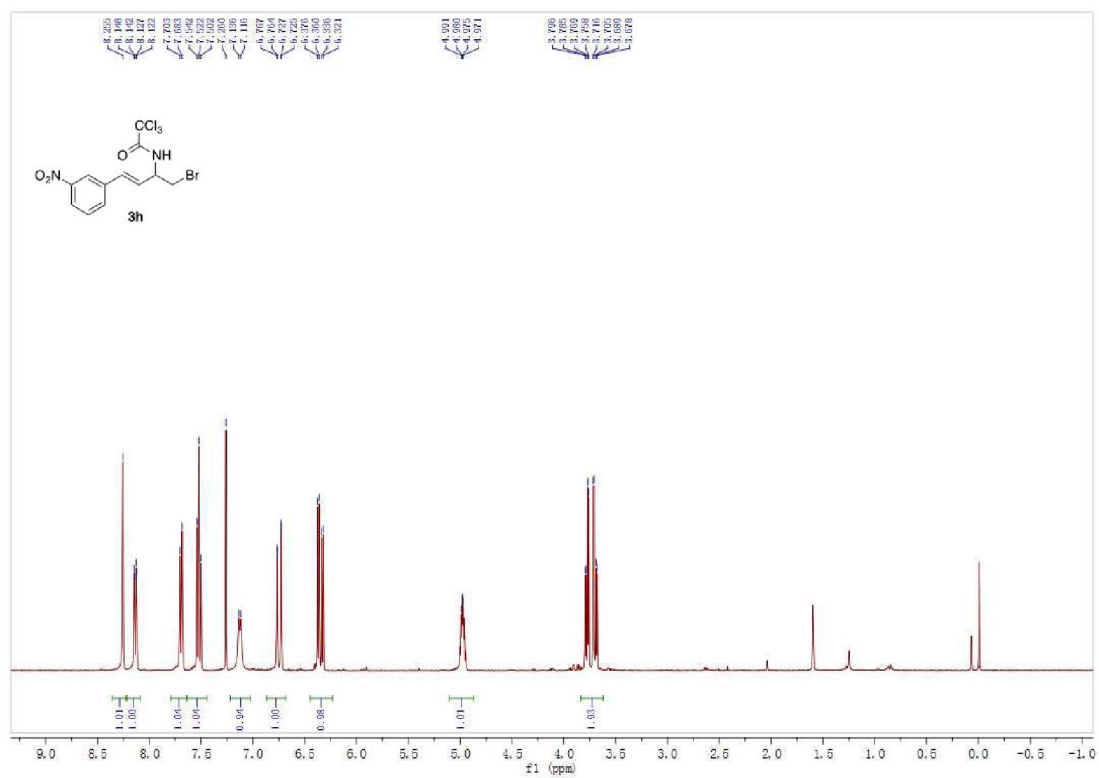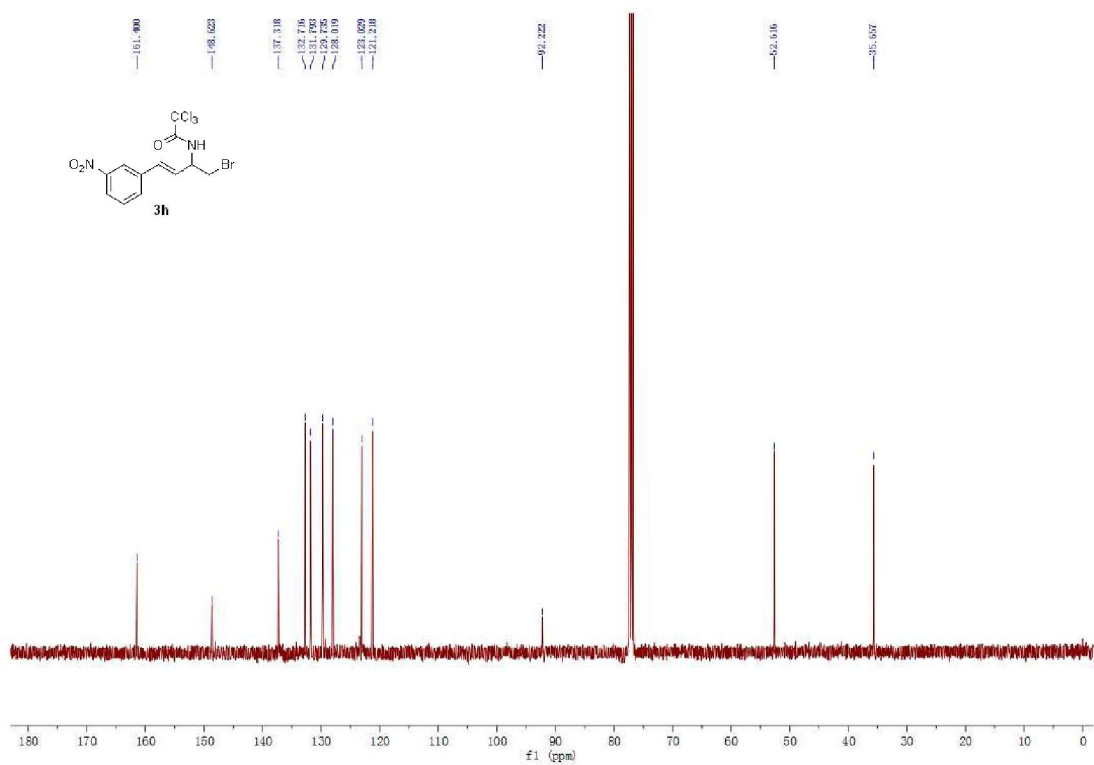

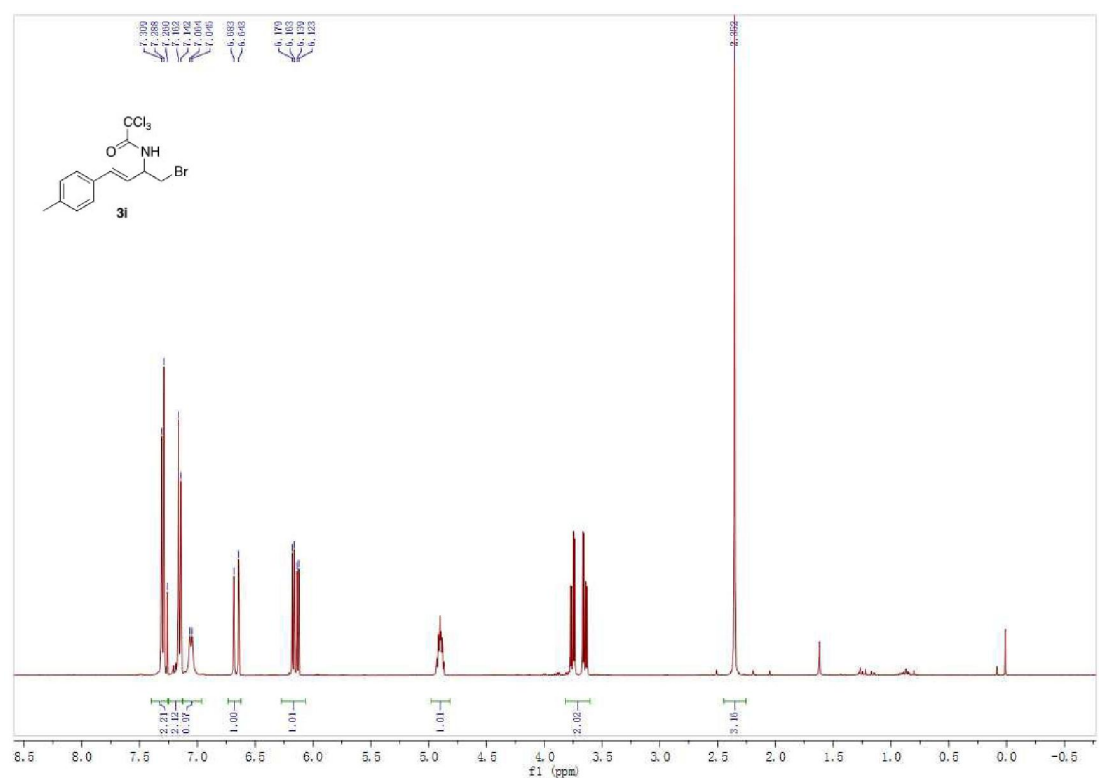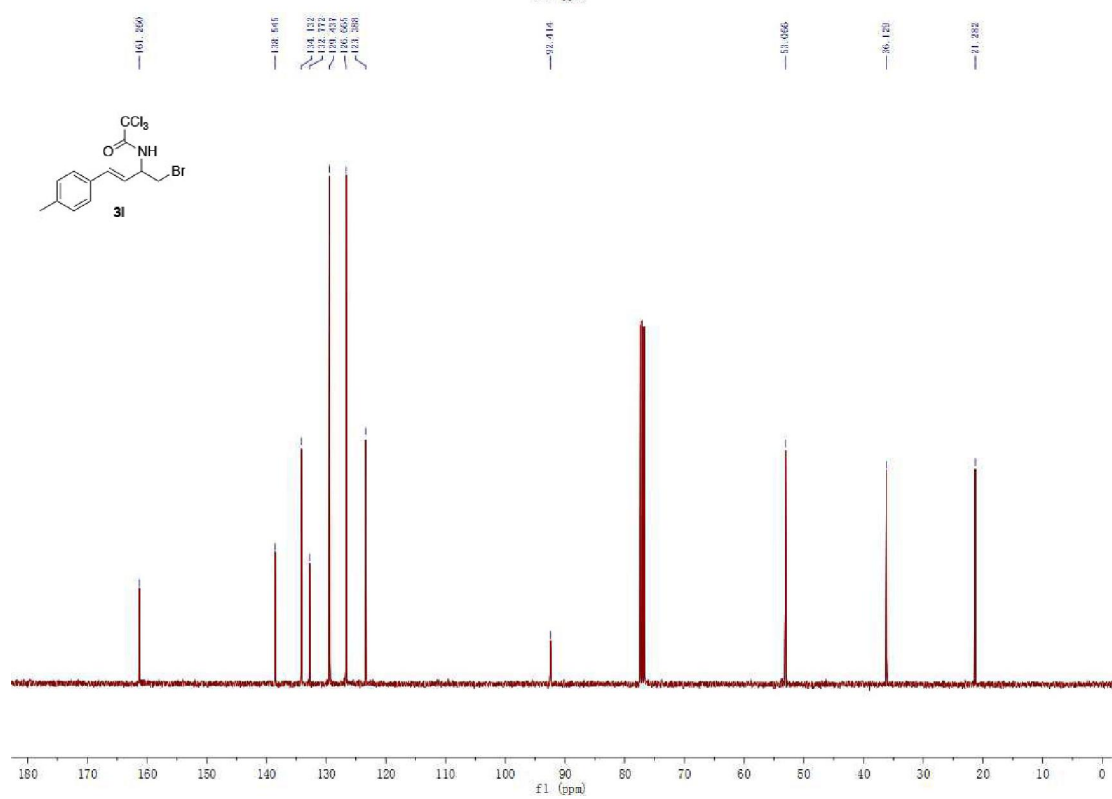

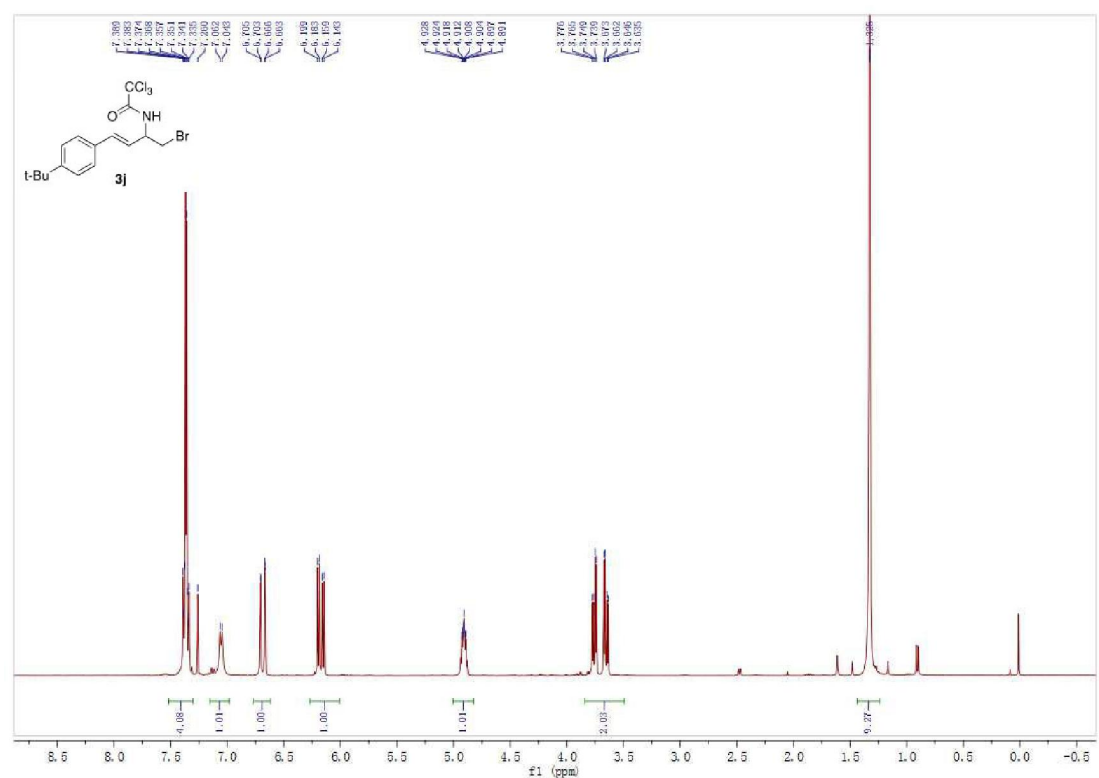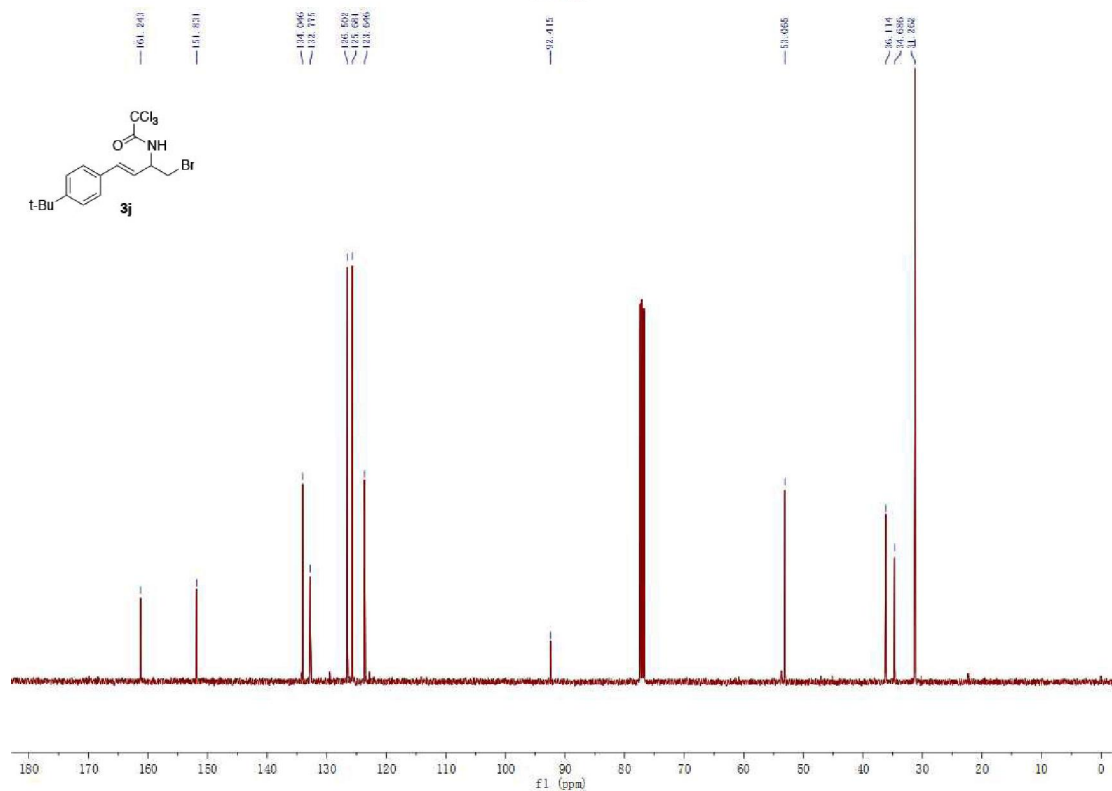

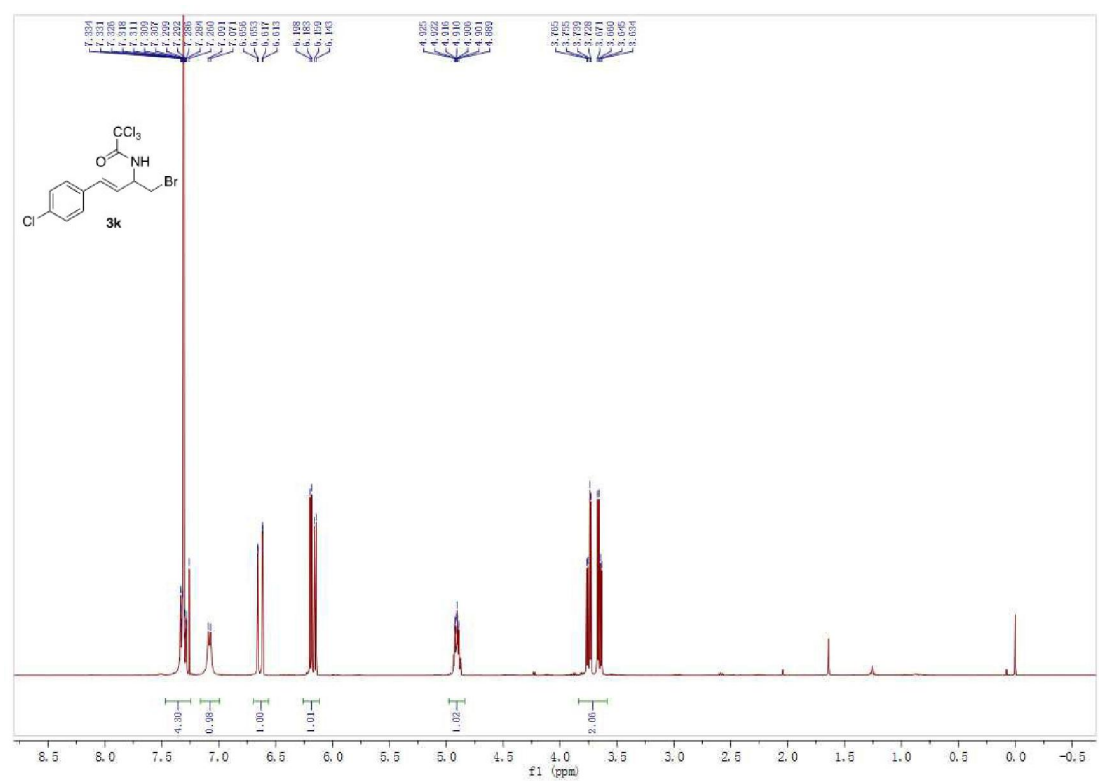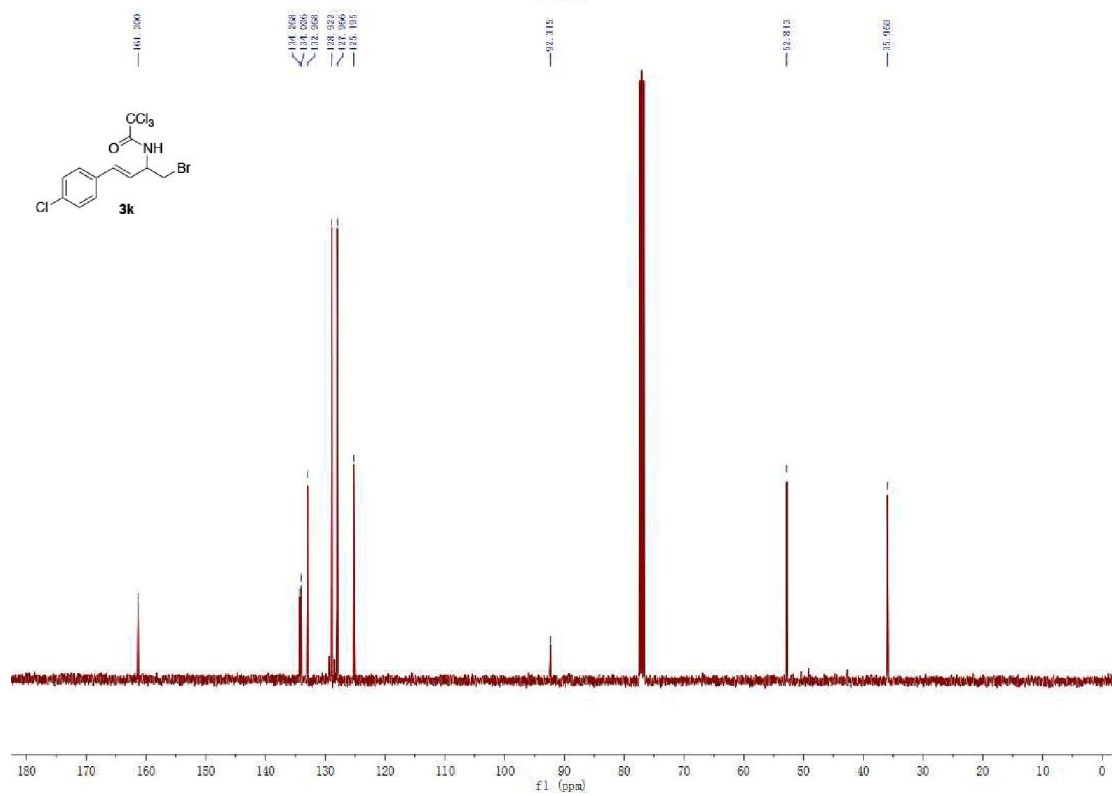

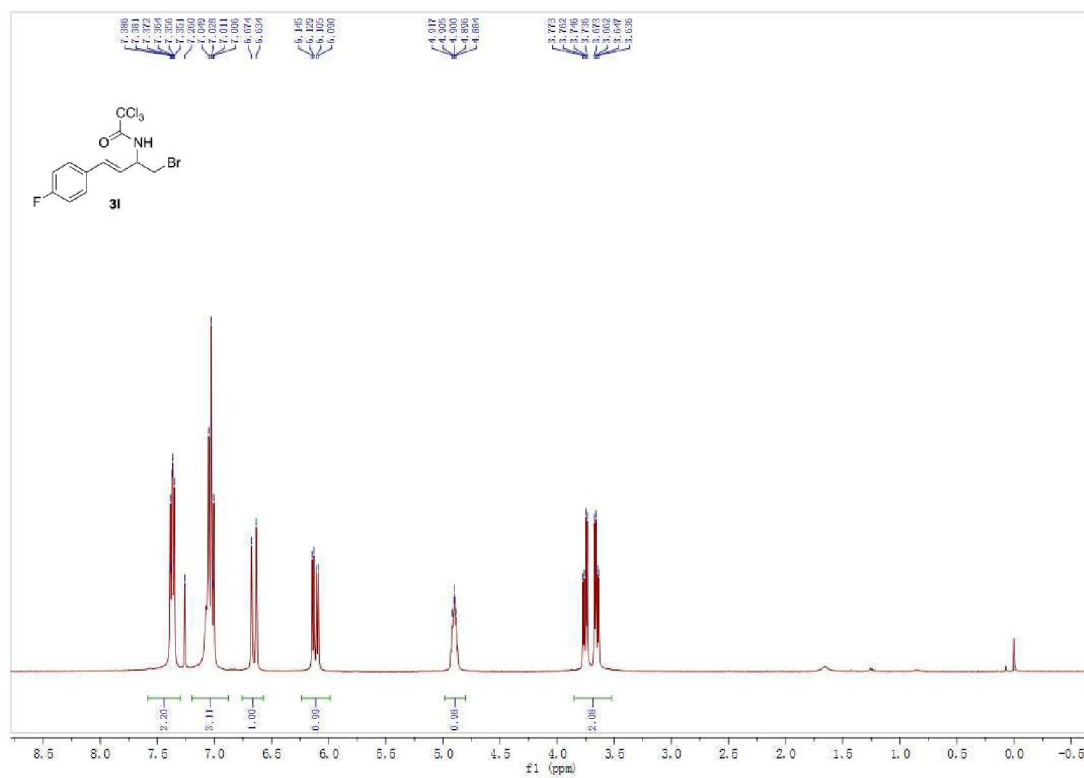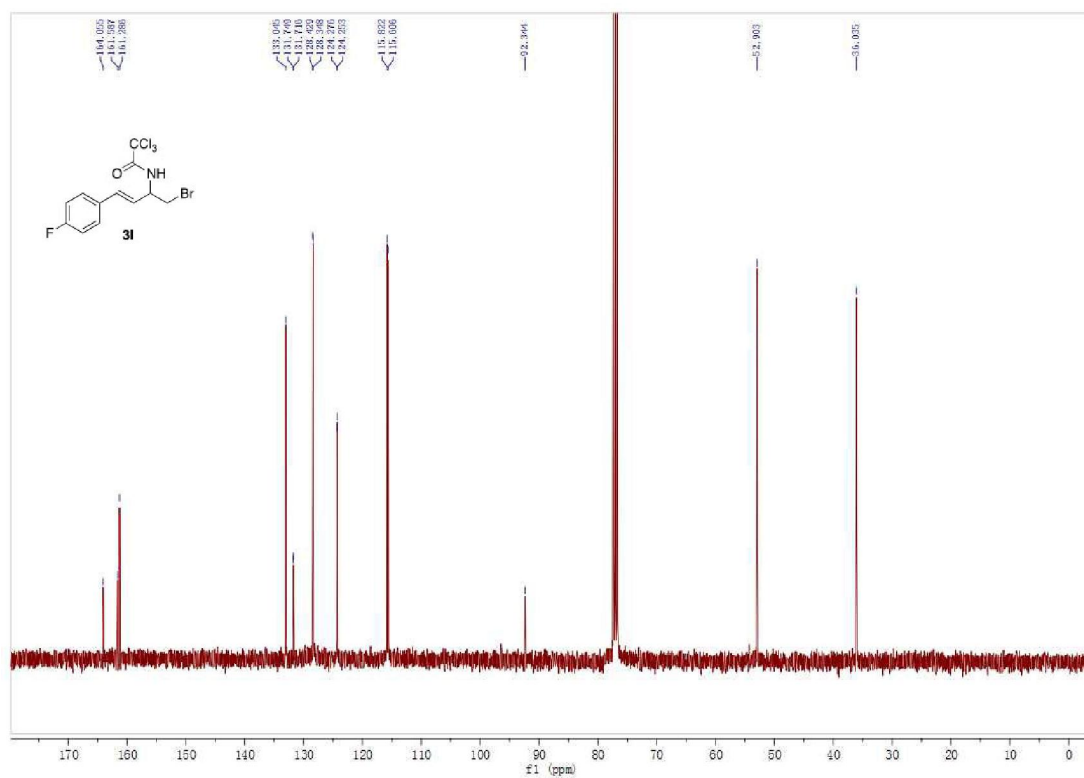



$^{19}\text{F}$  NMR (376 MHz,  $\text{CDCl}_3$ )

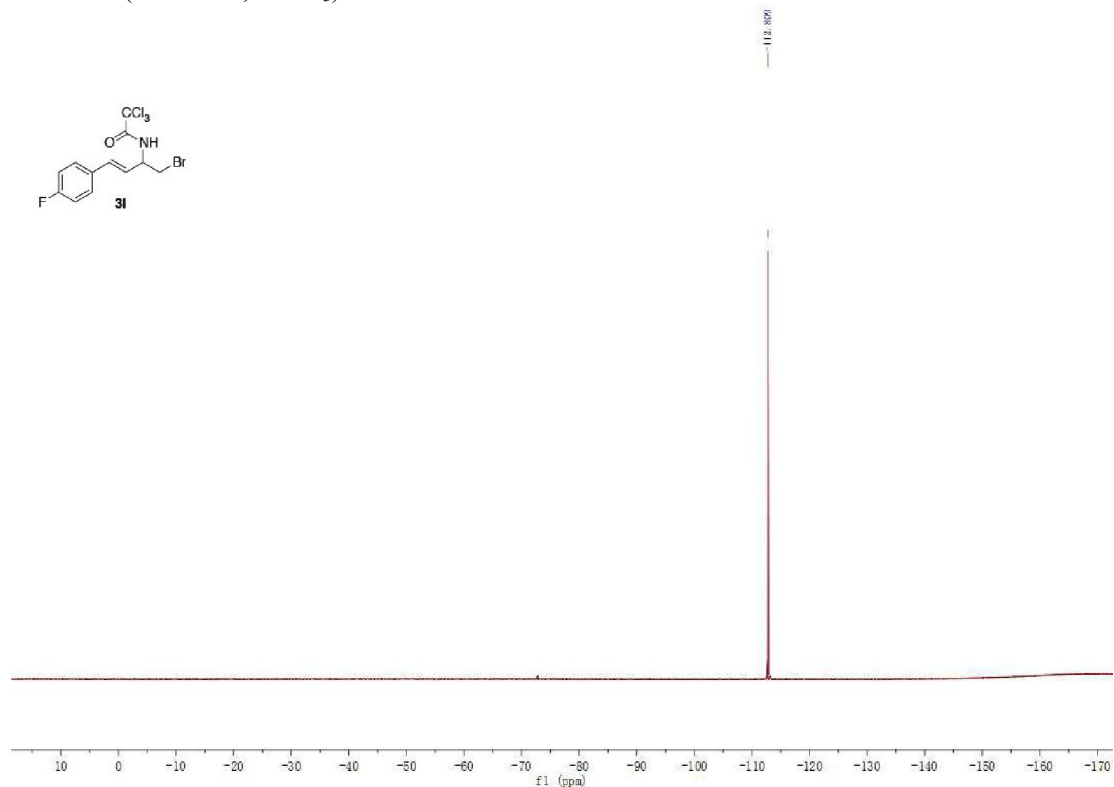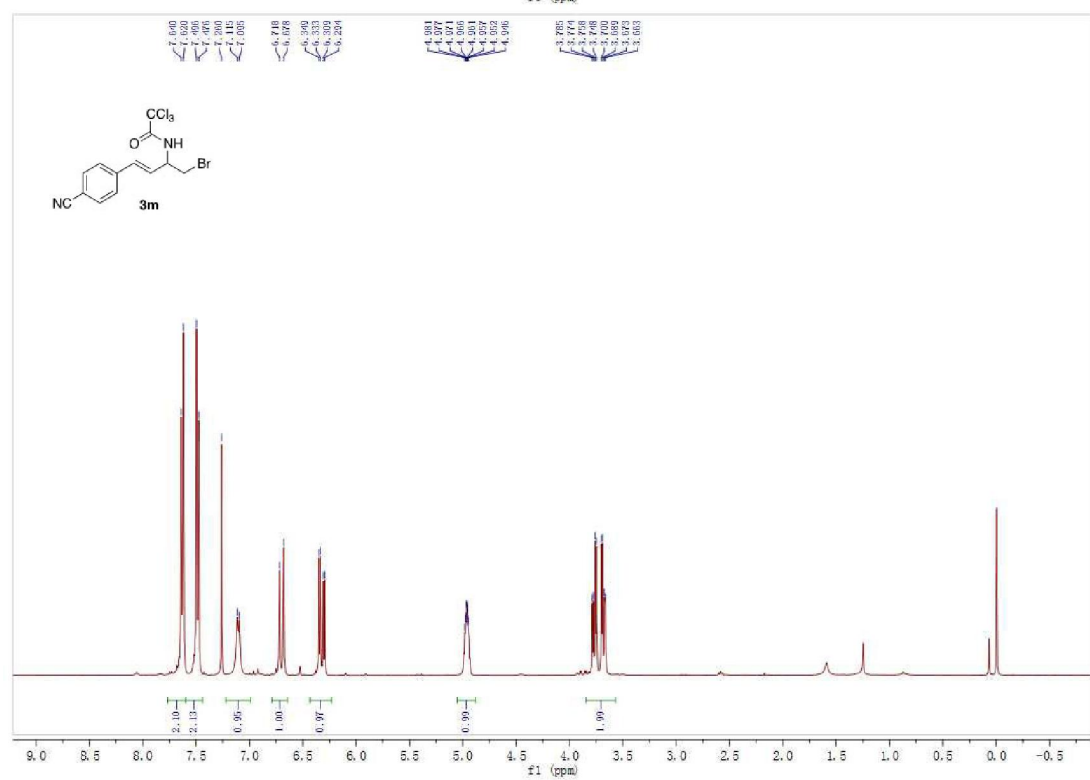

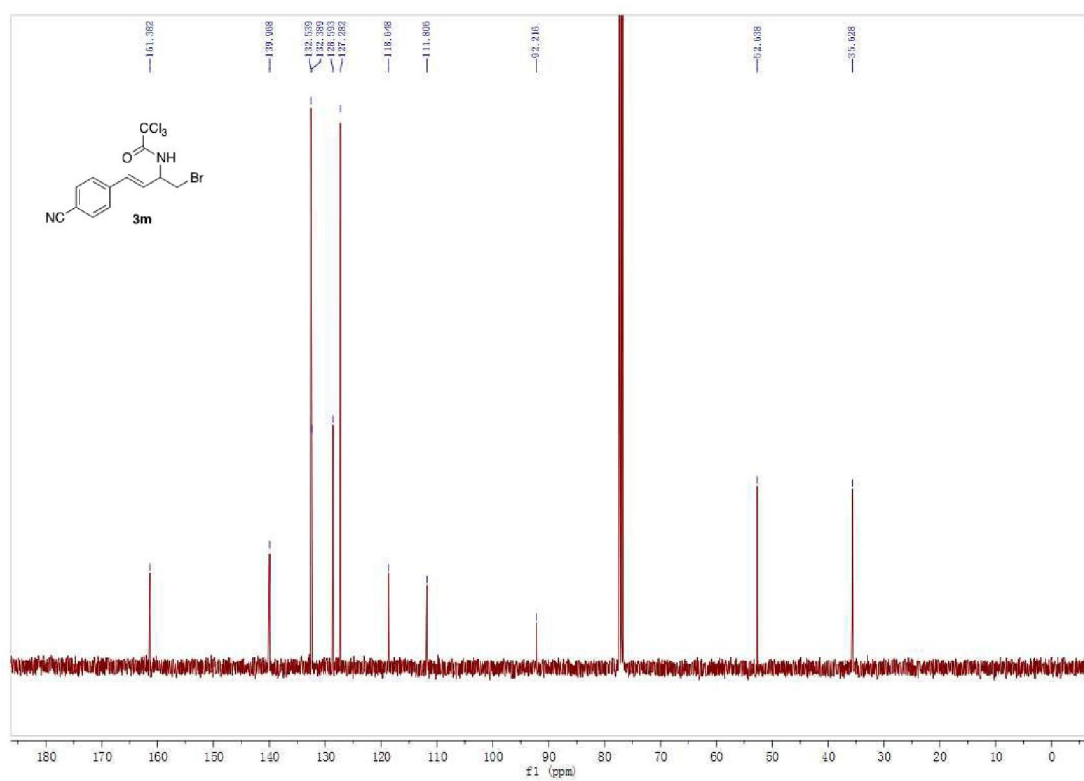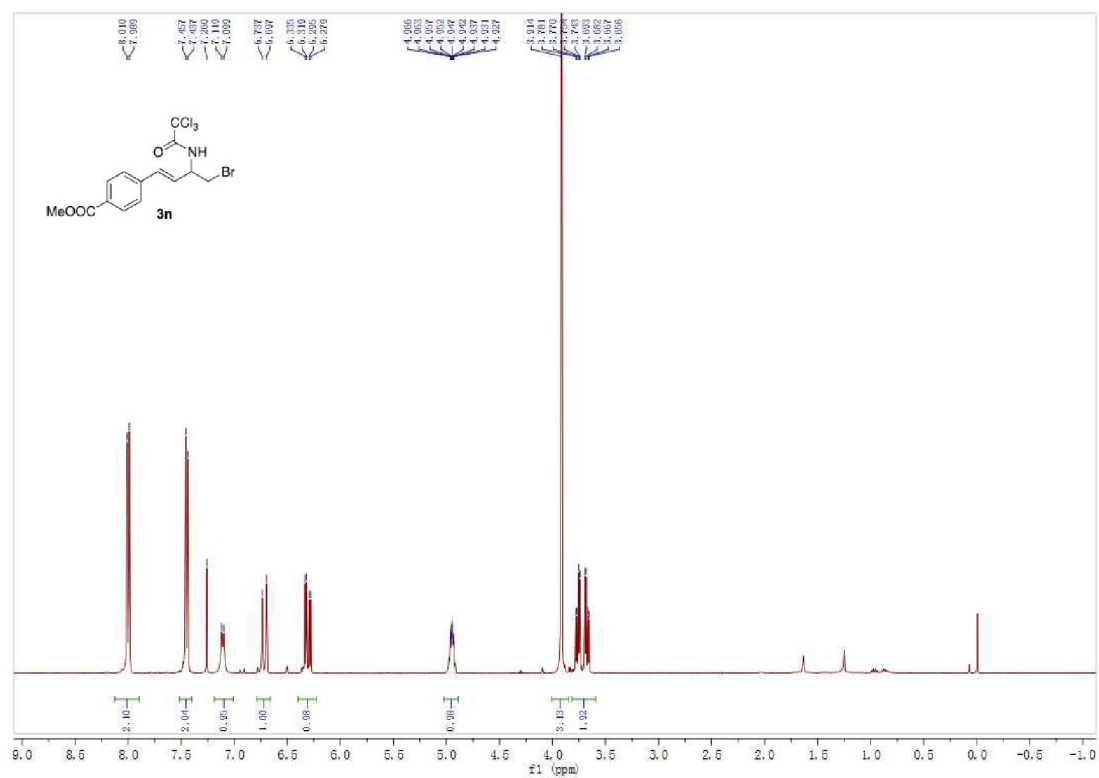

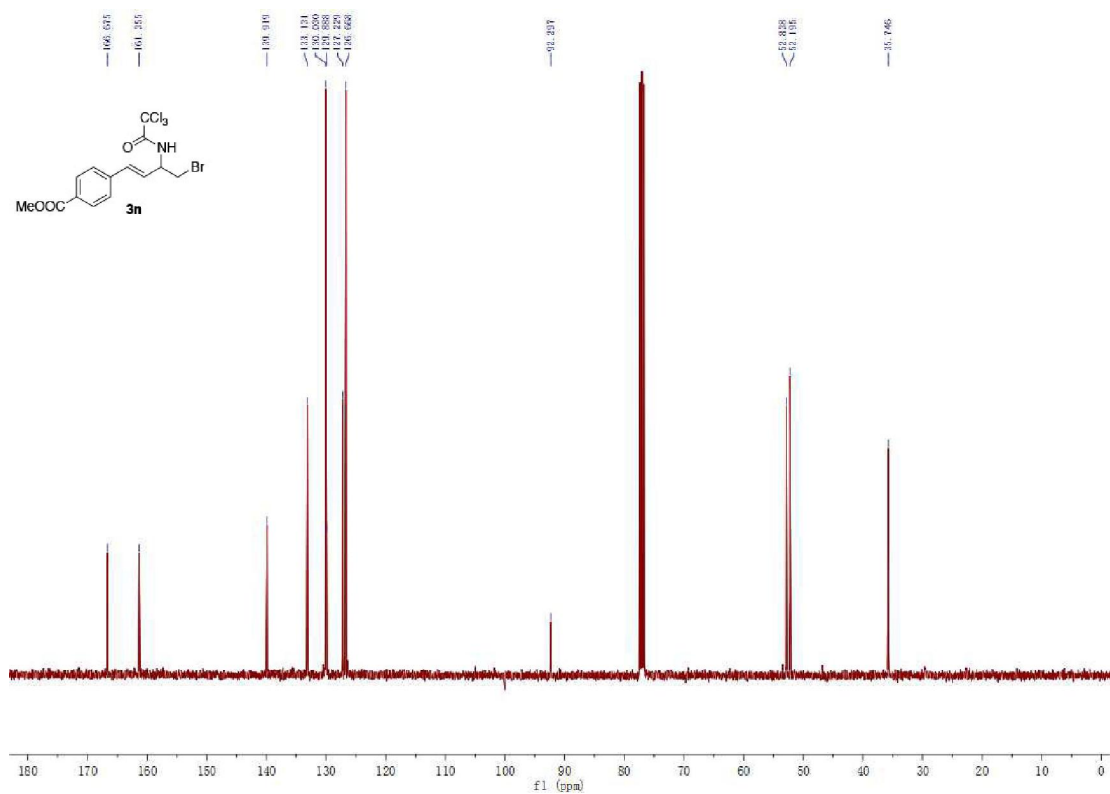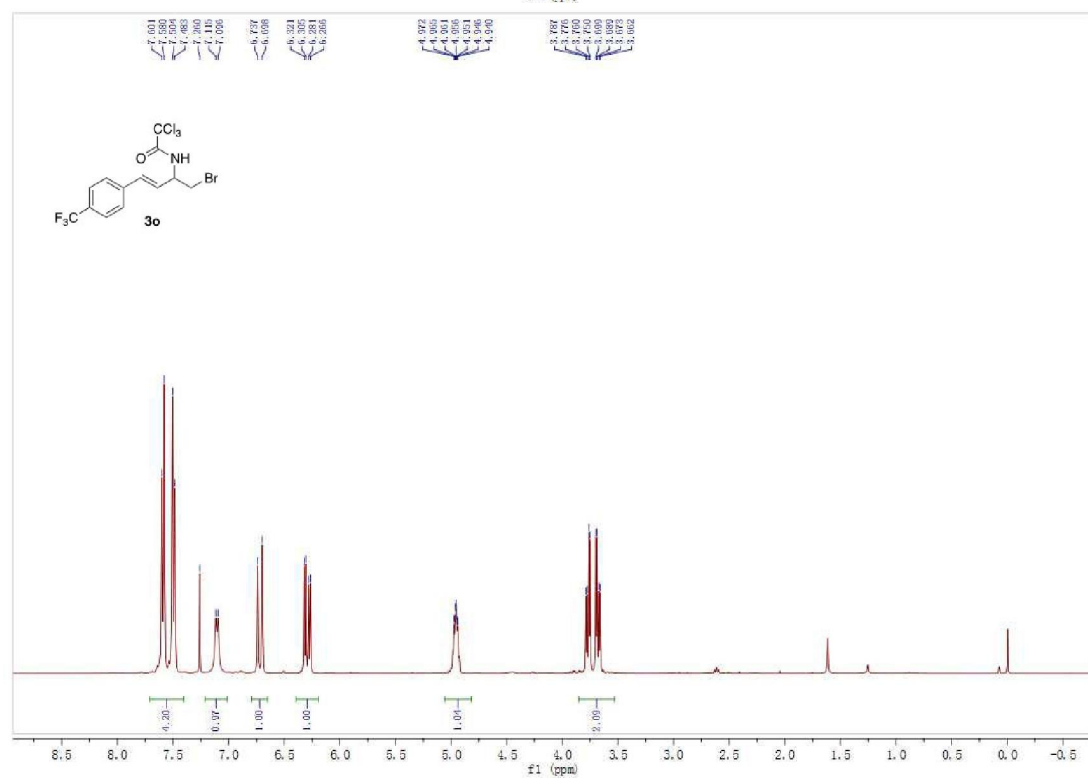

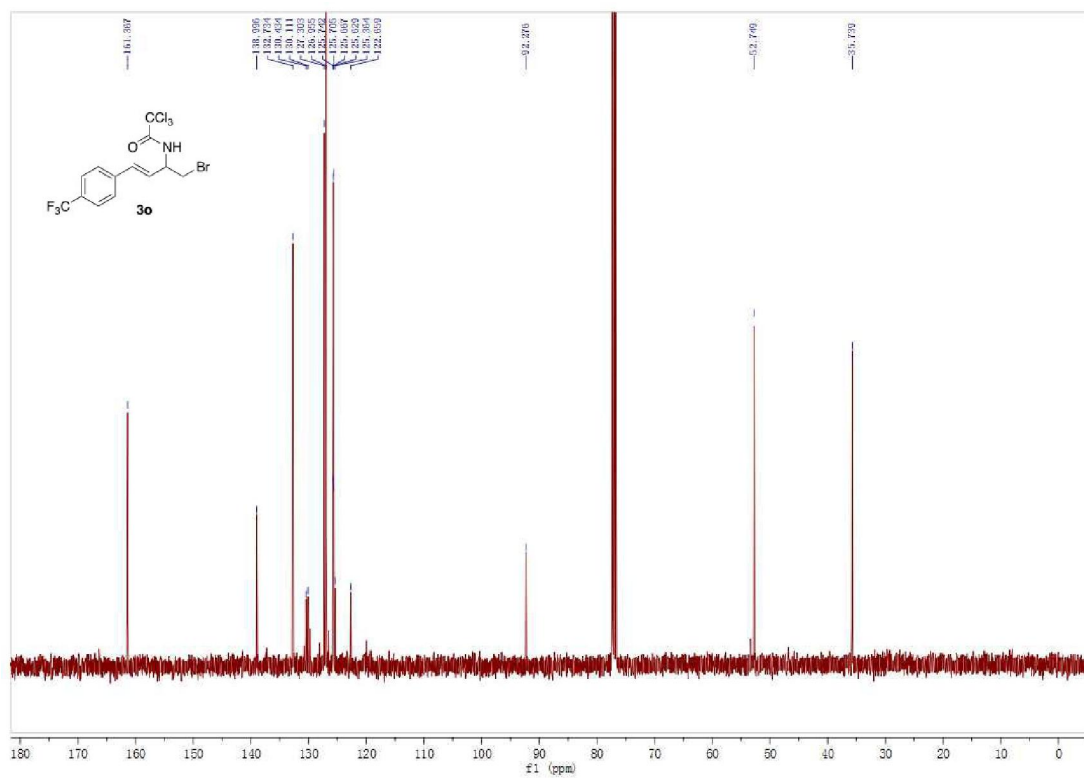

<sup>19</sup>F NMR (376 MHz, CDCl<sub>3</sub>)

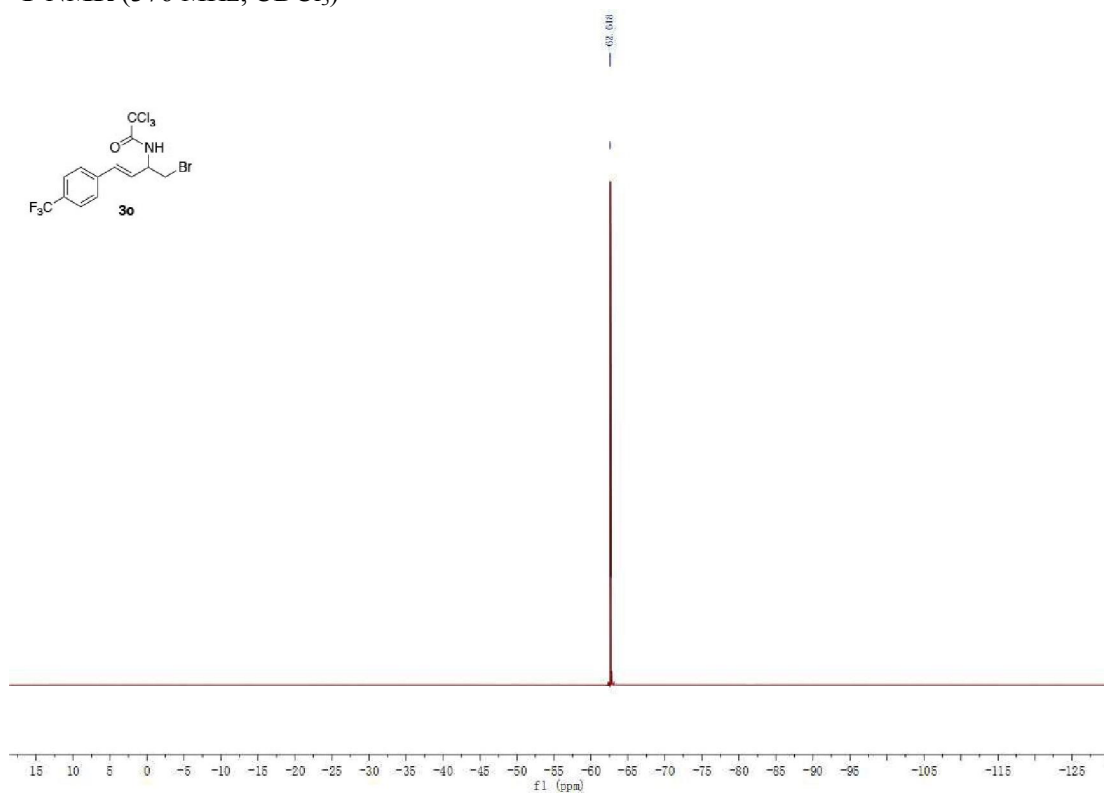



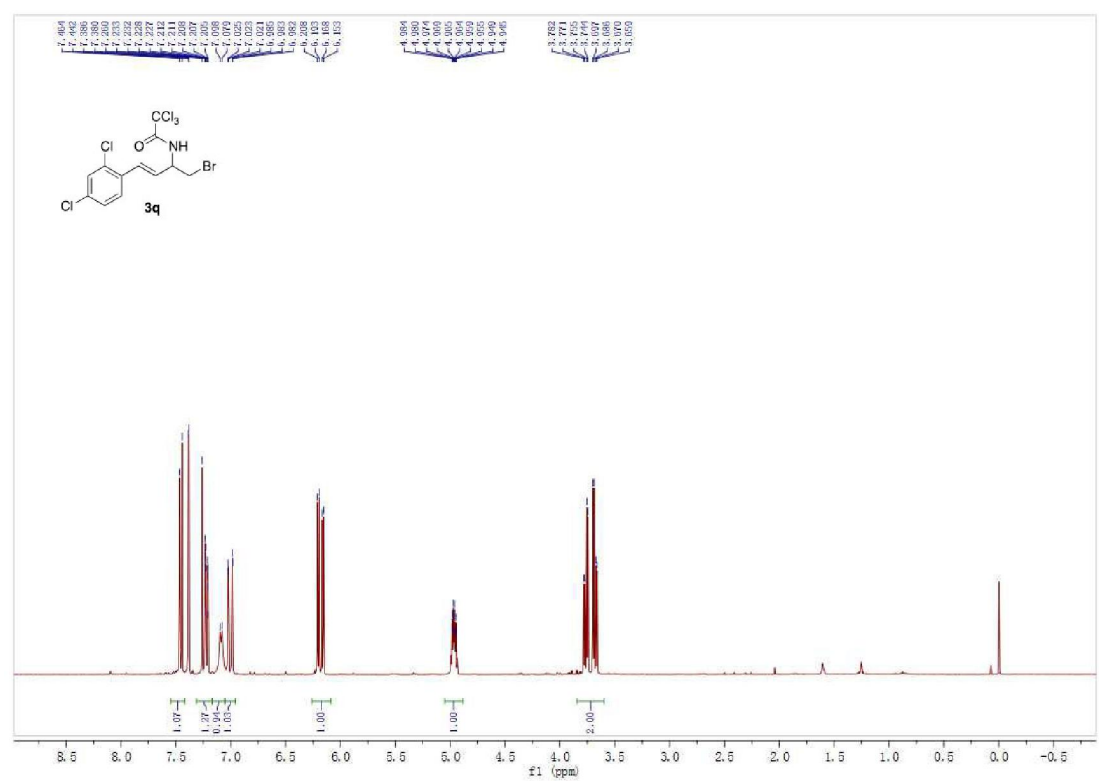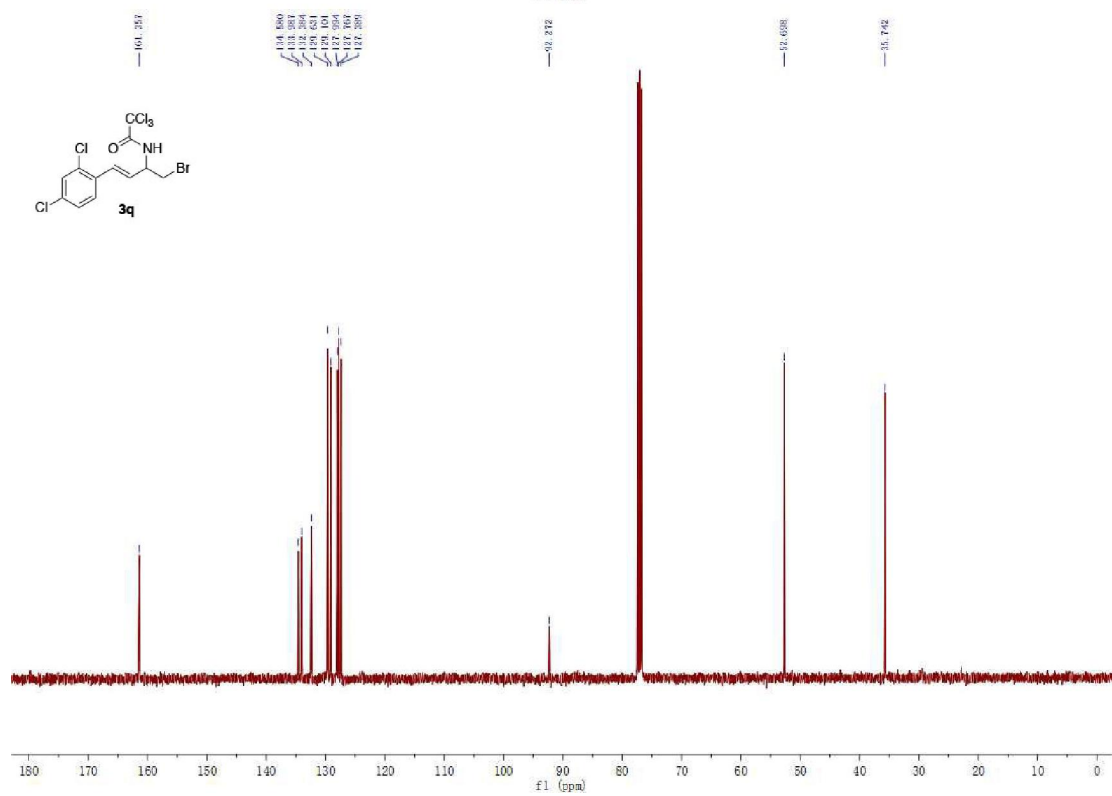

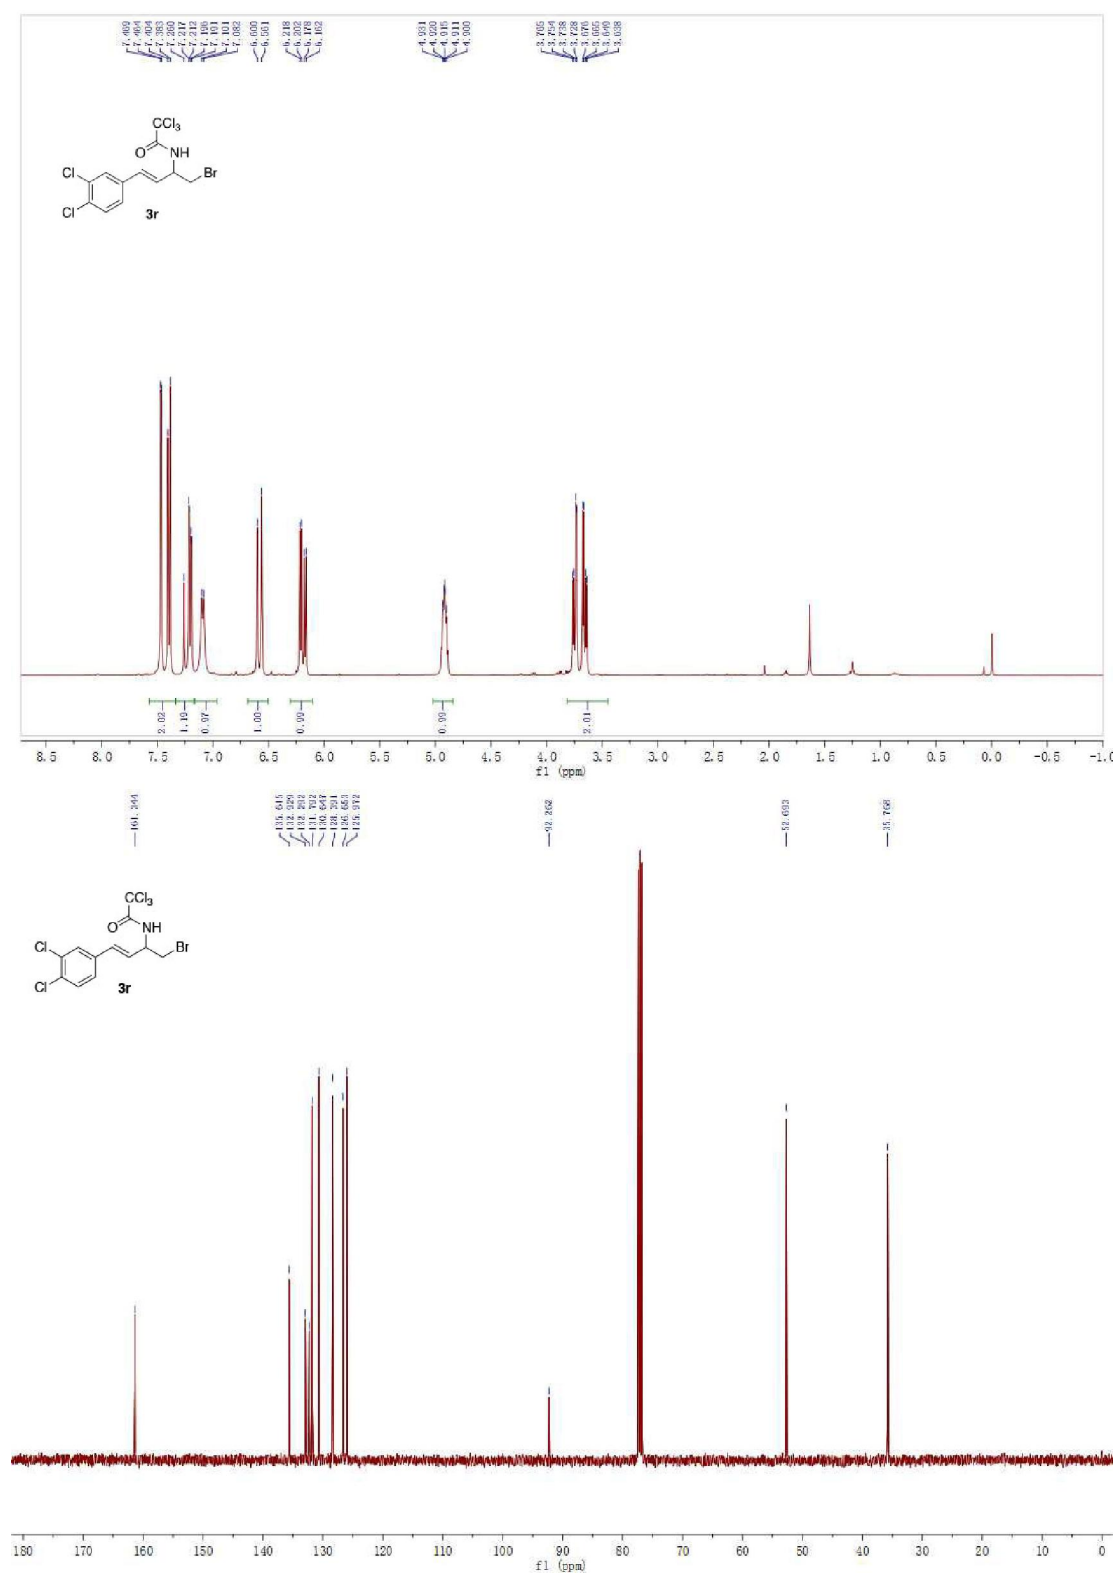

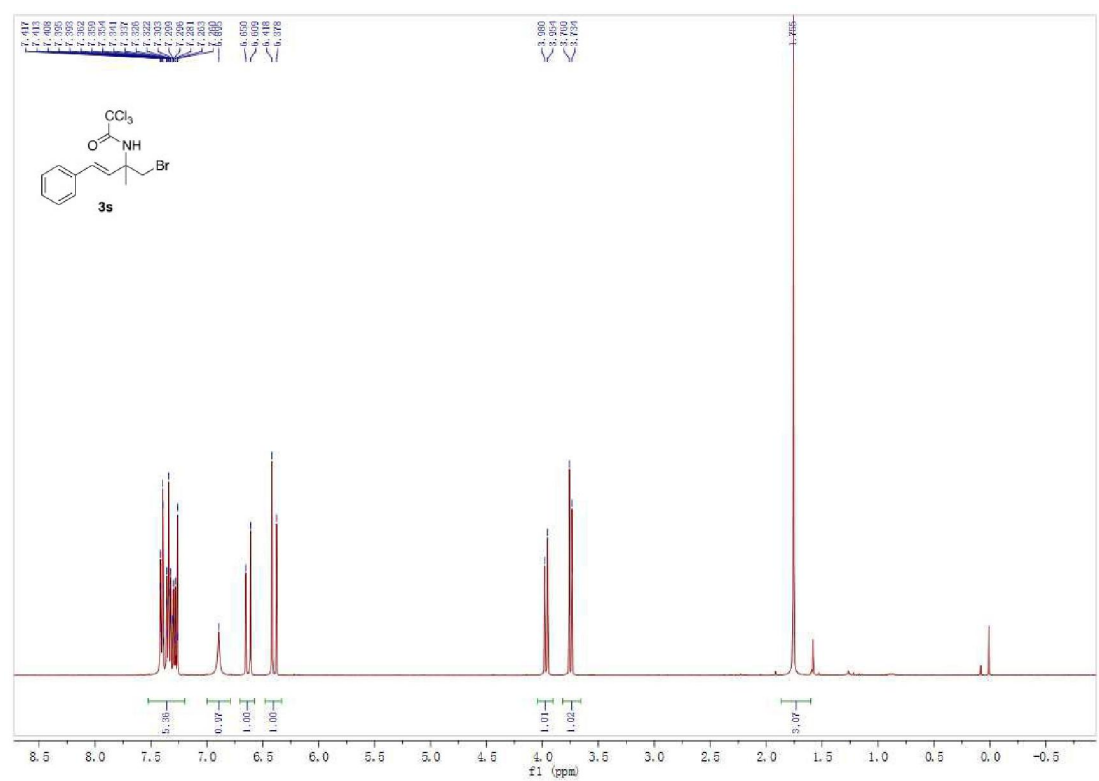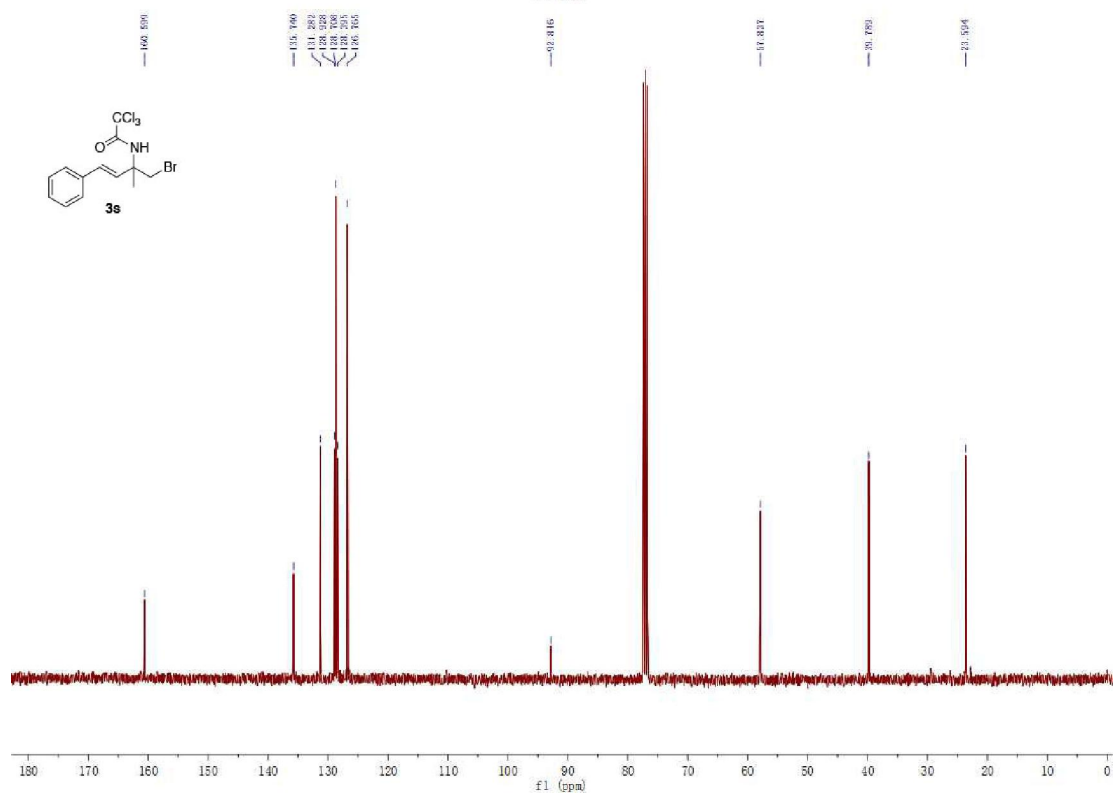



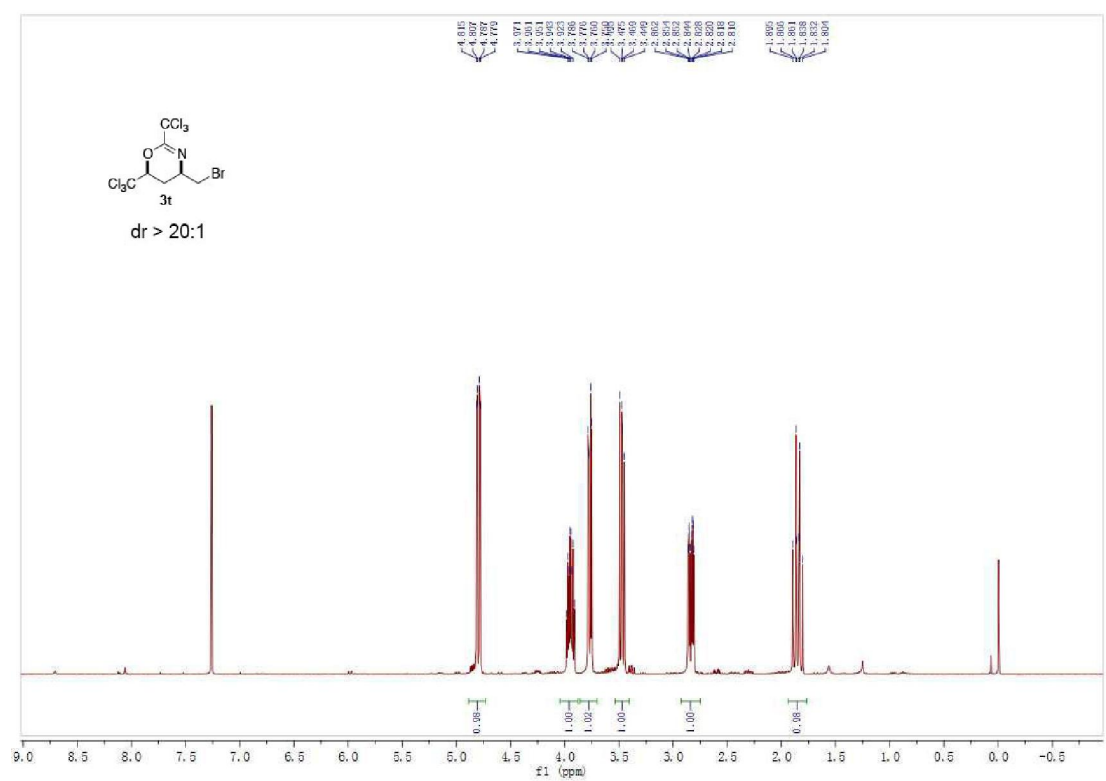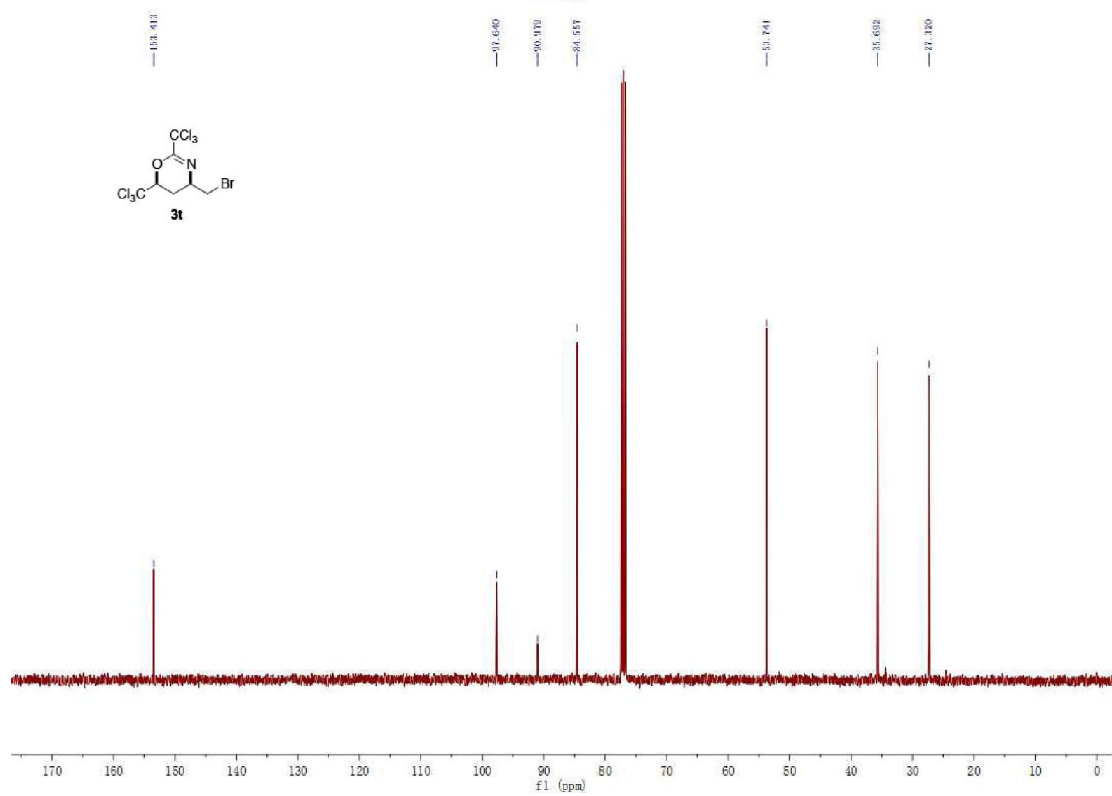



The NOE correlation of **3u**

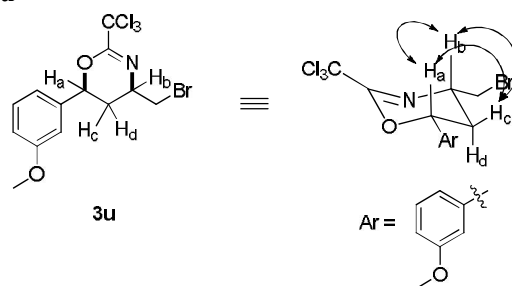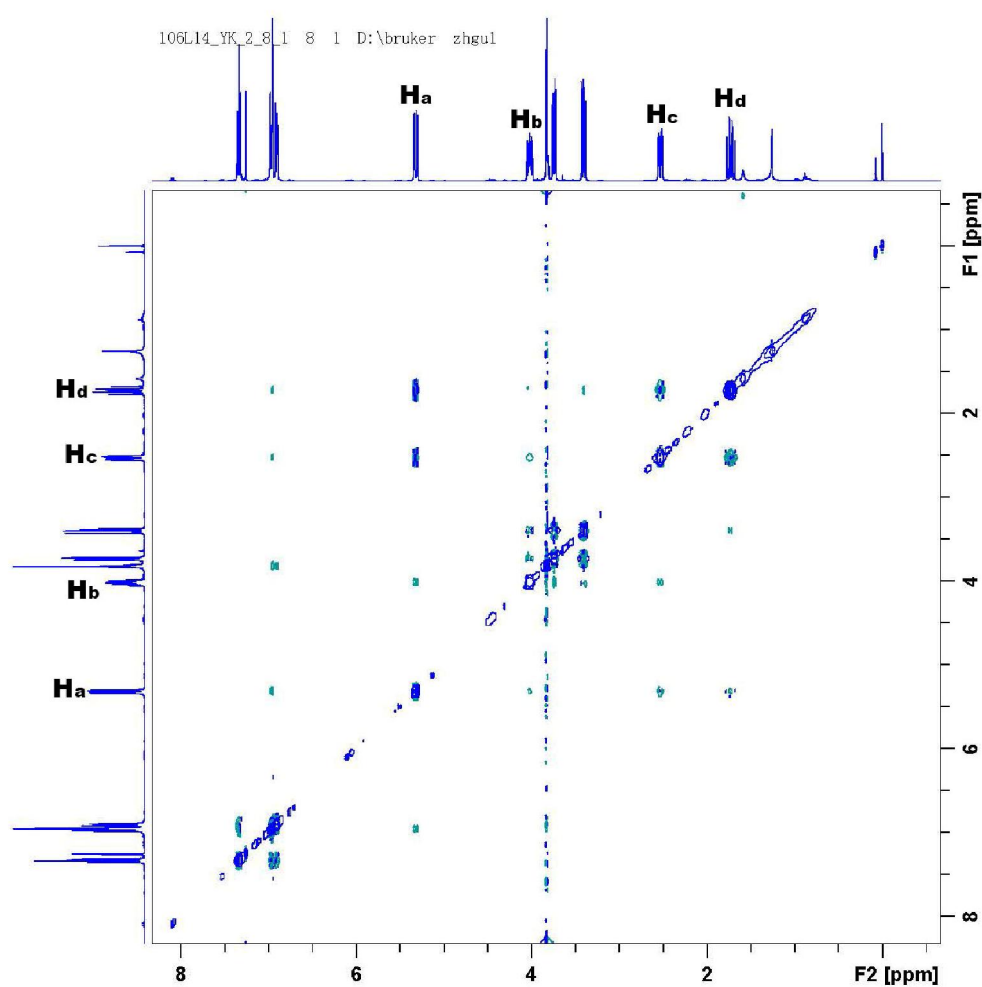

The  $H,H$ -COSY of **3u**

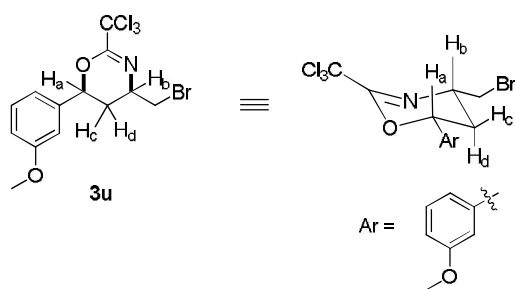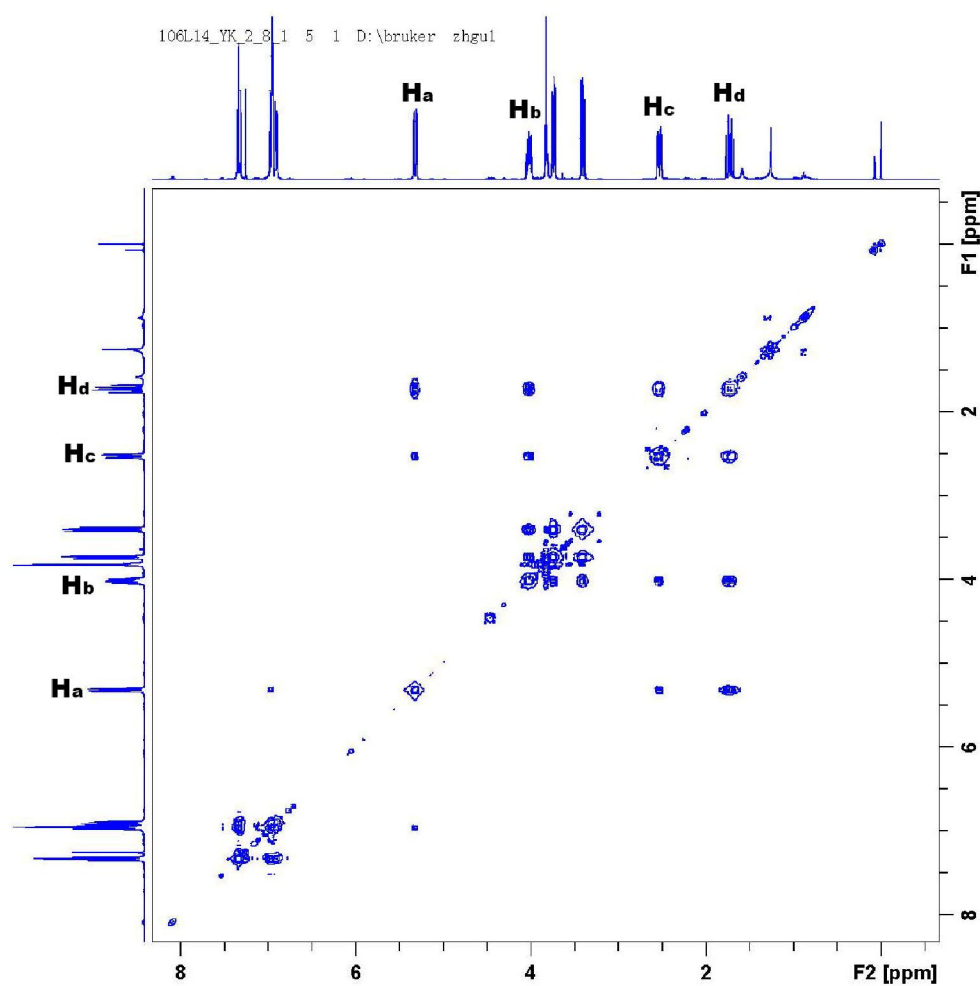

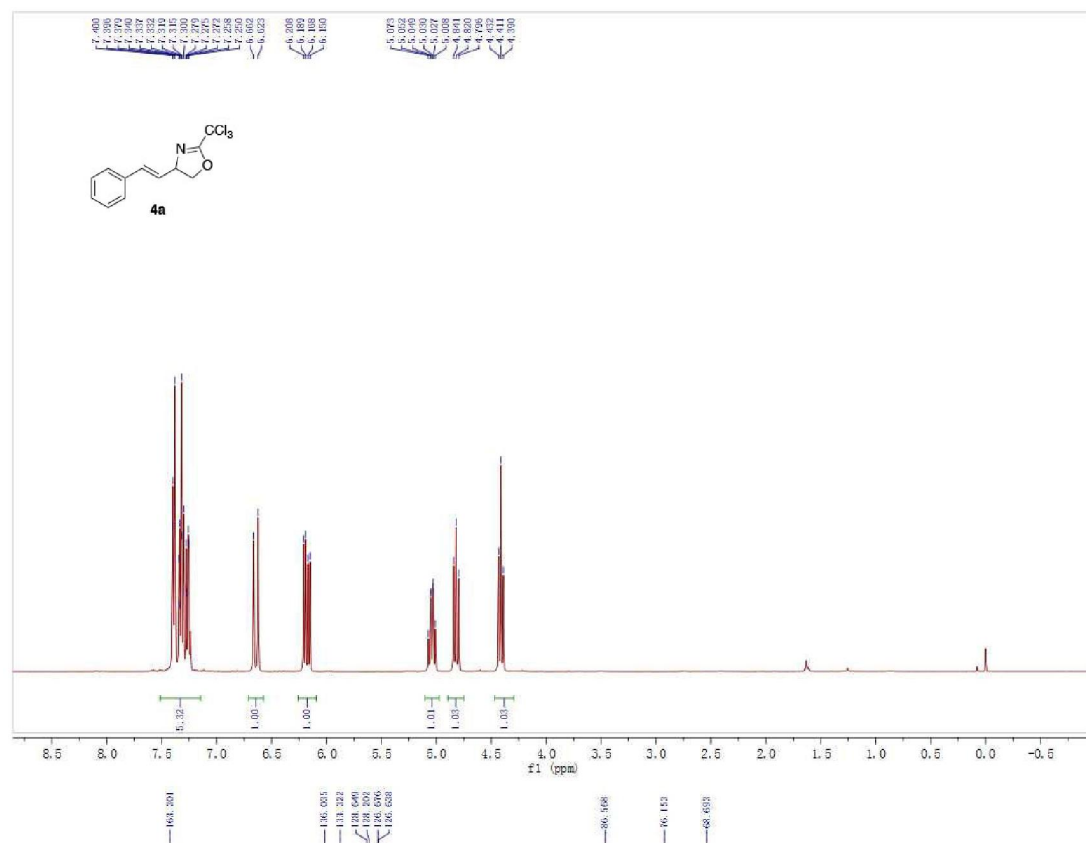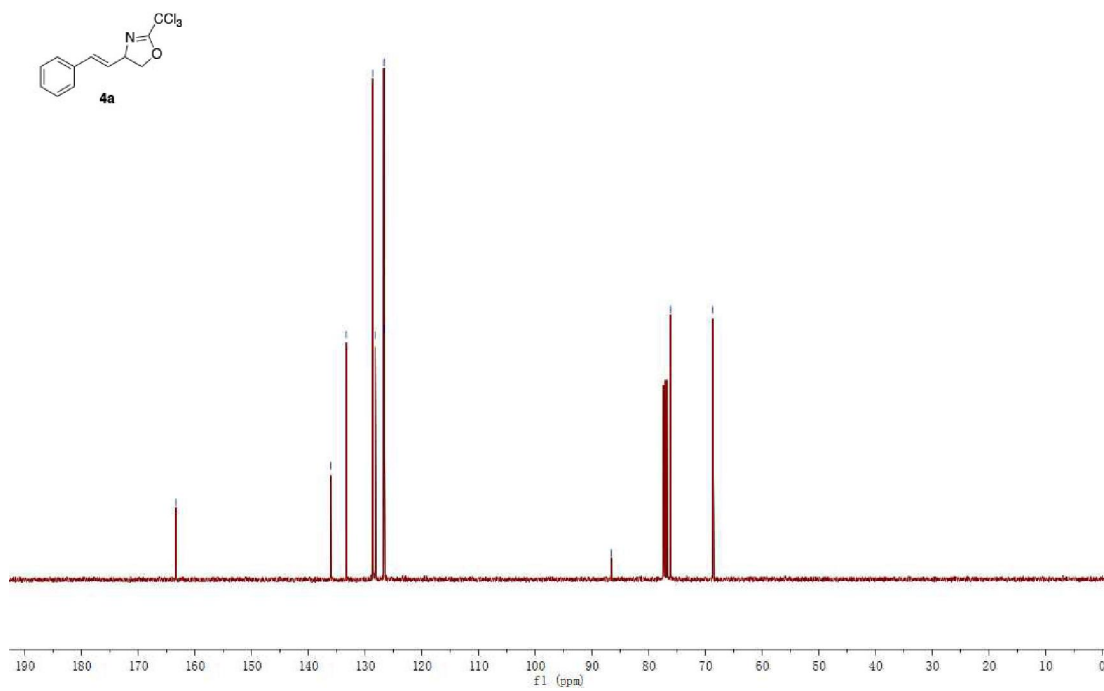

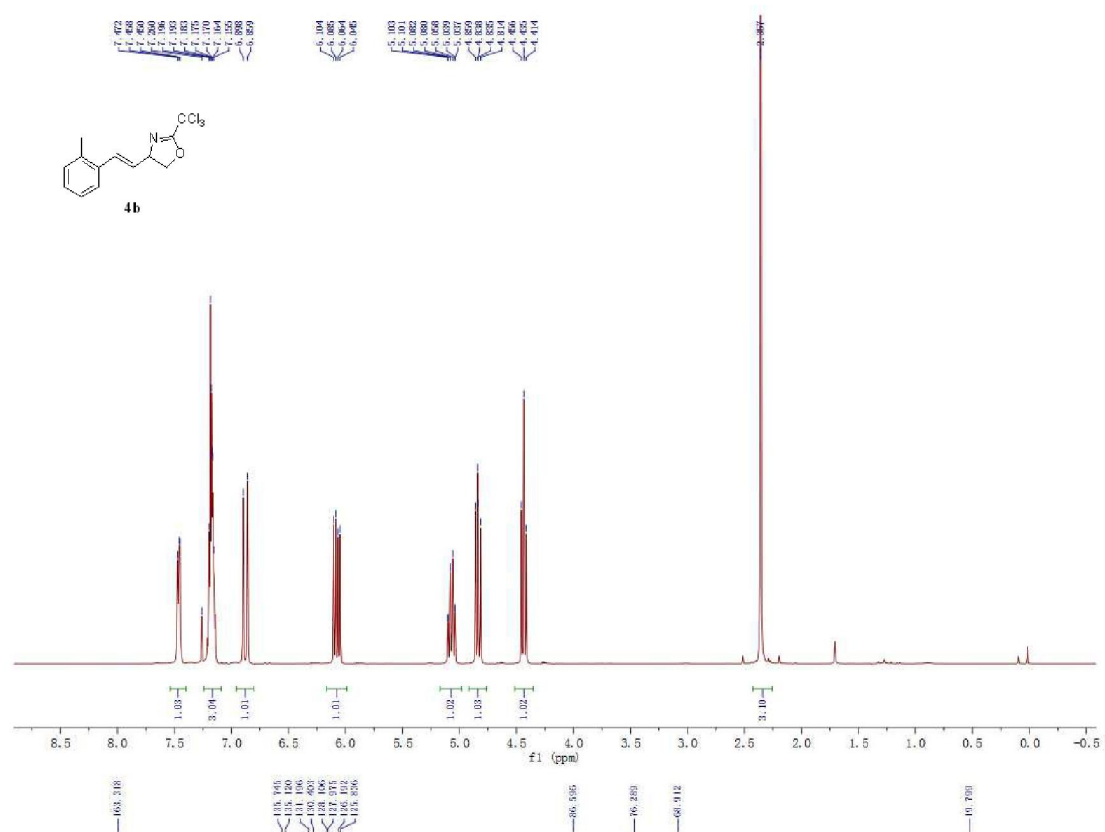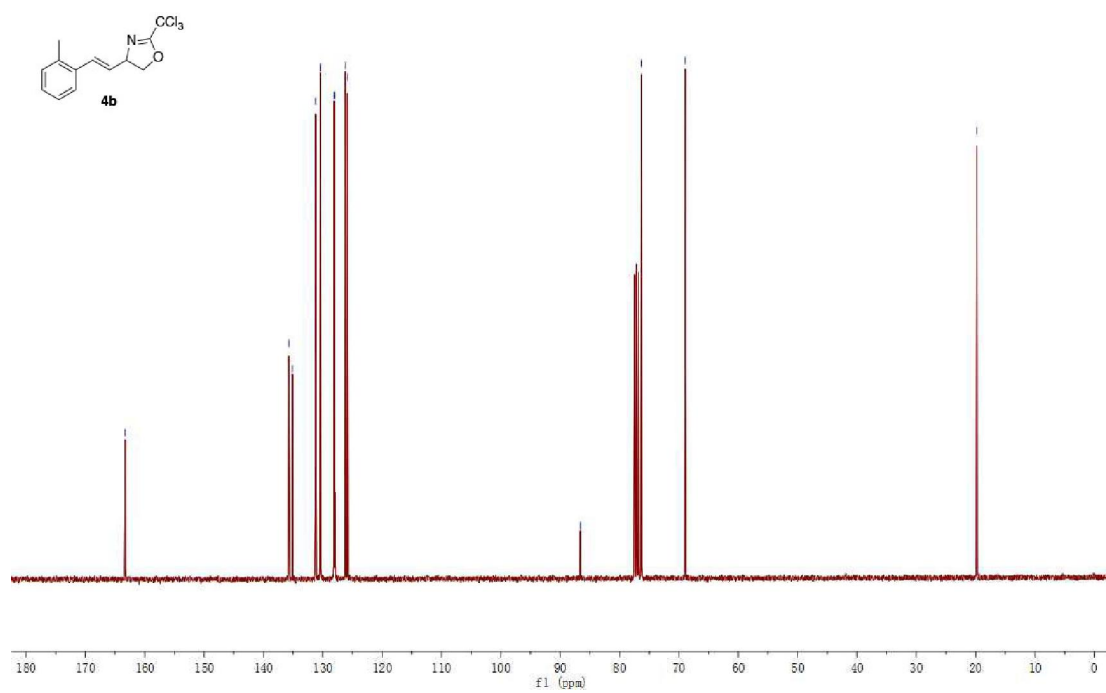

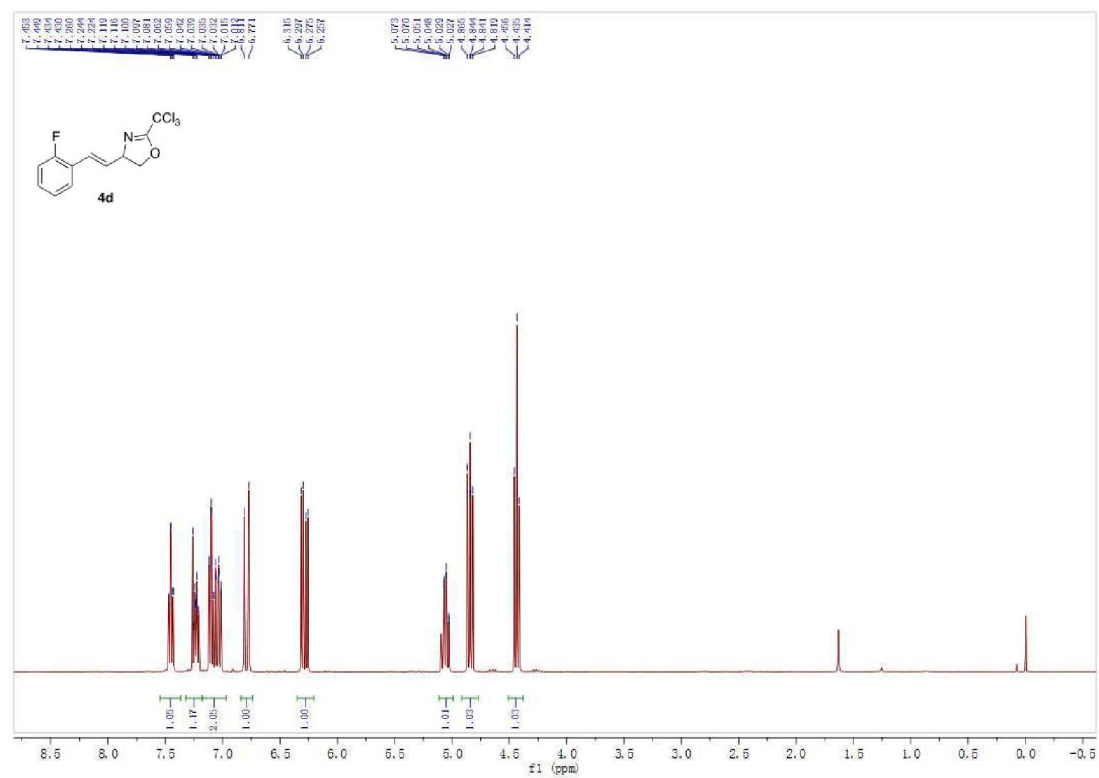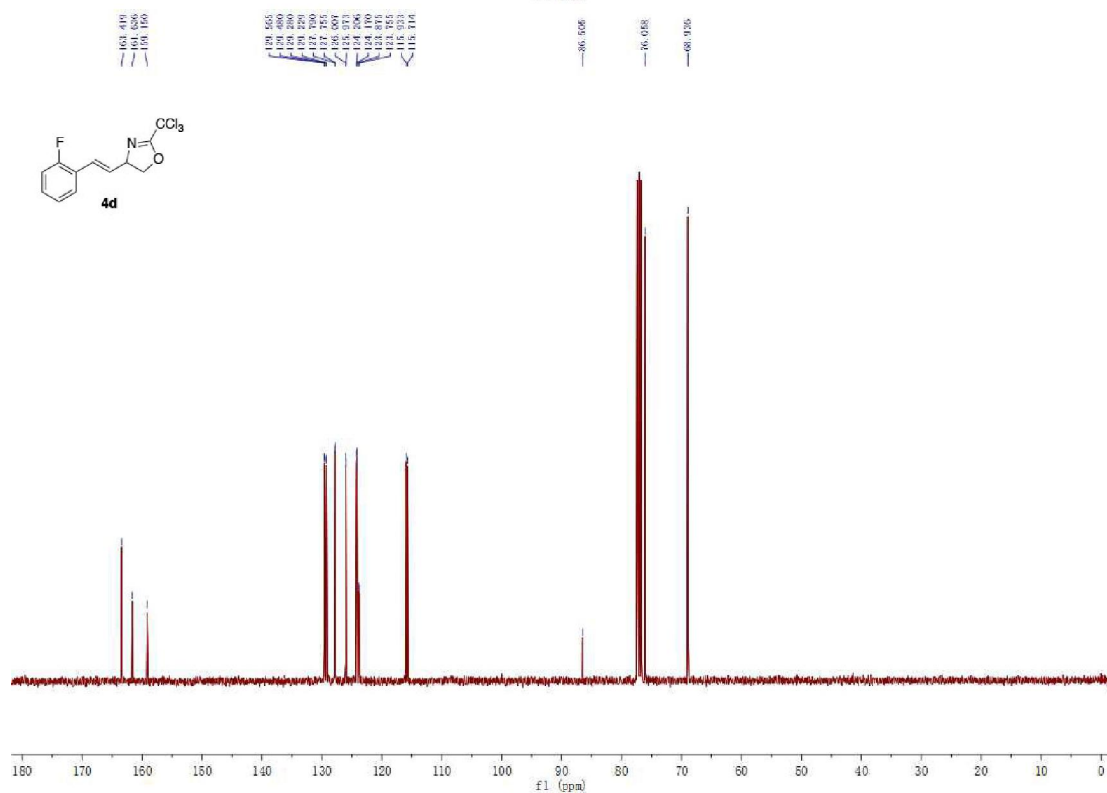

**$^{19}\text{F}$  NMR (376 MHz,  $\text{CDCl}_3$ )**

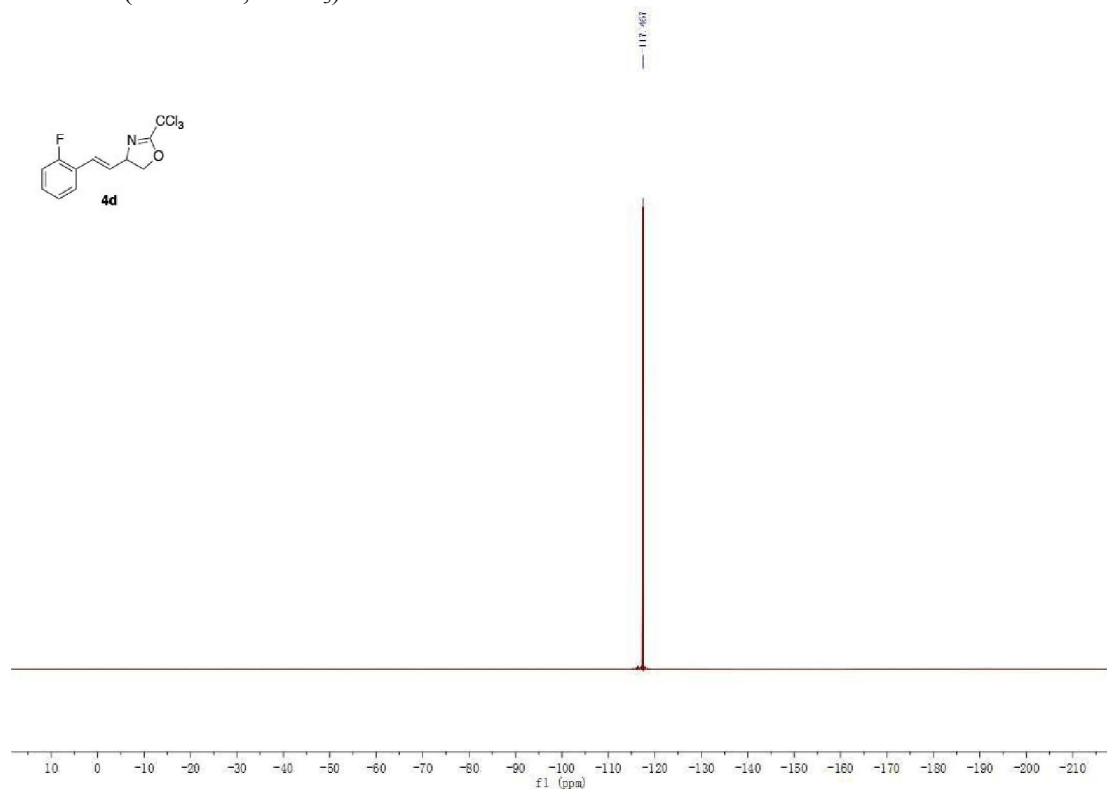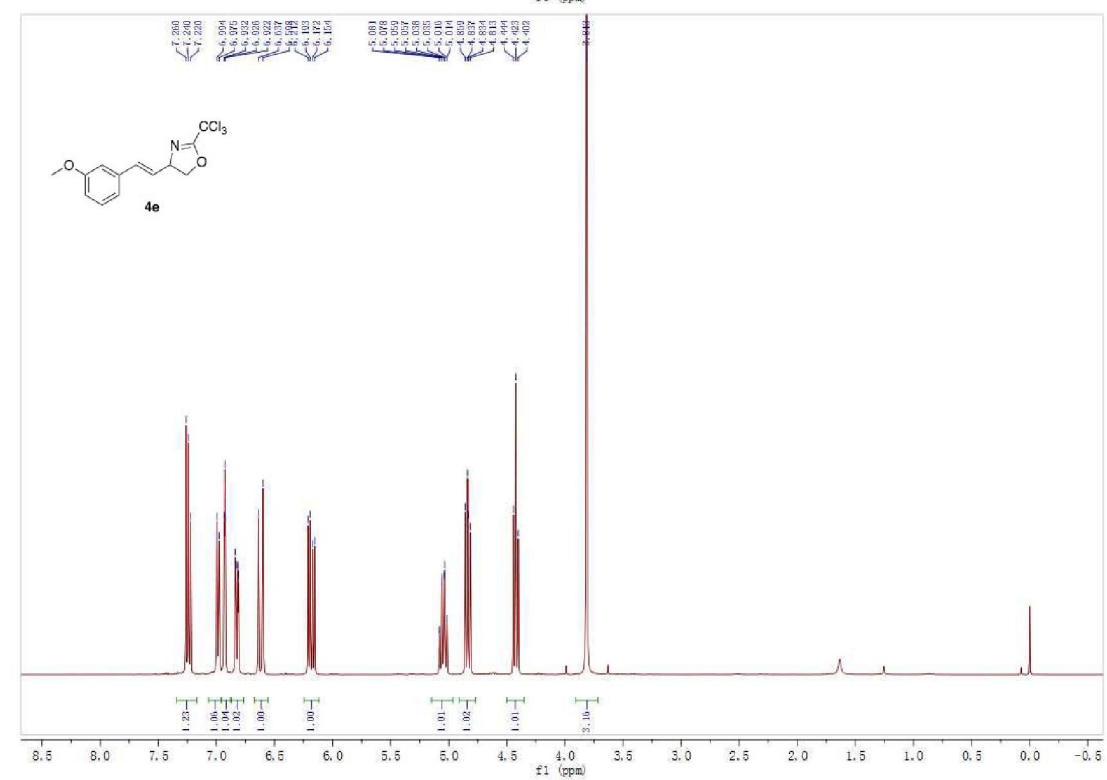





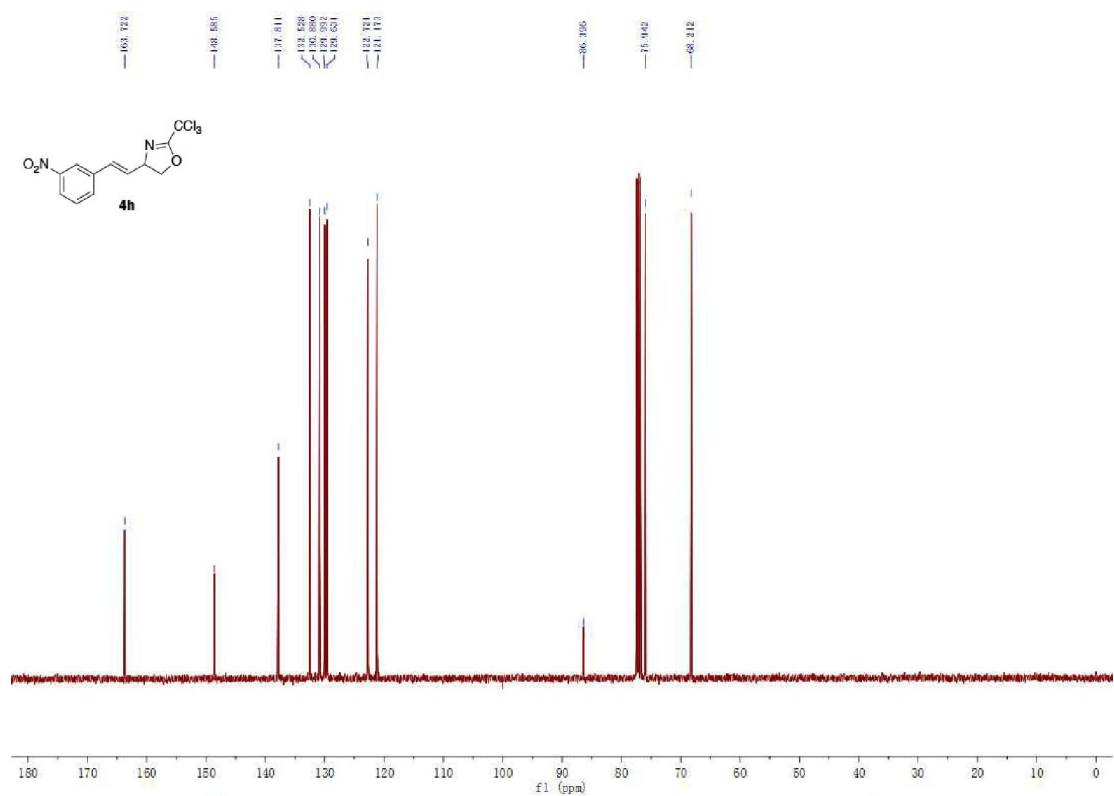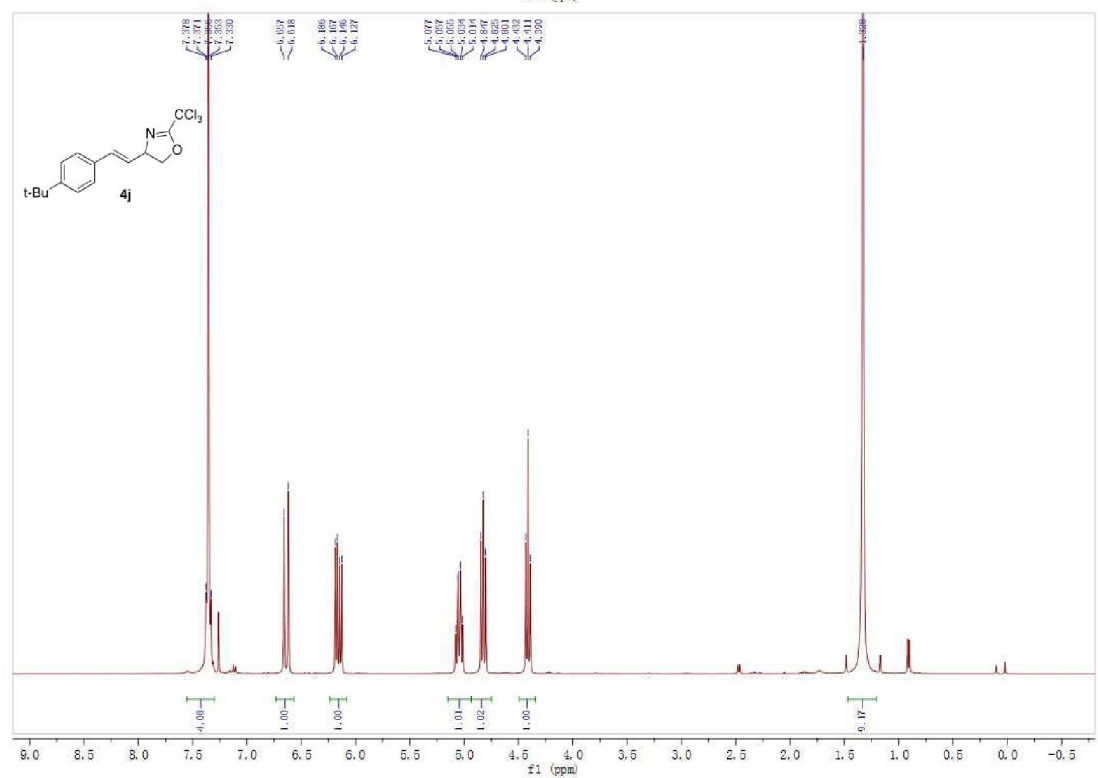

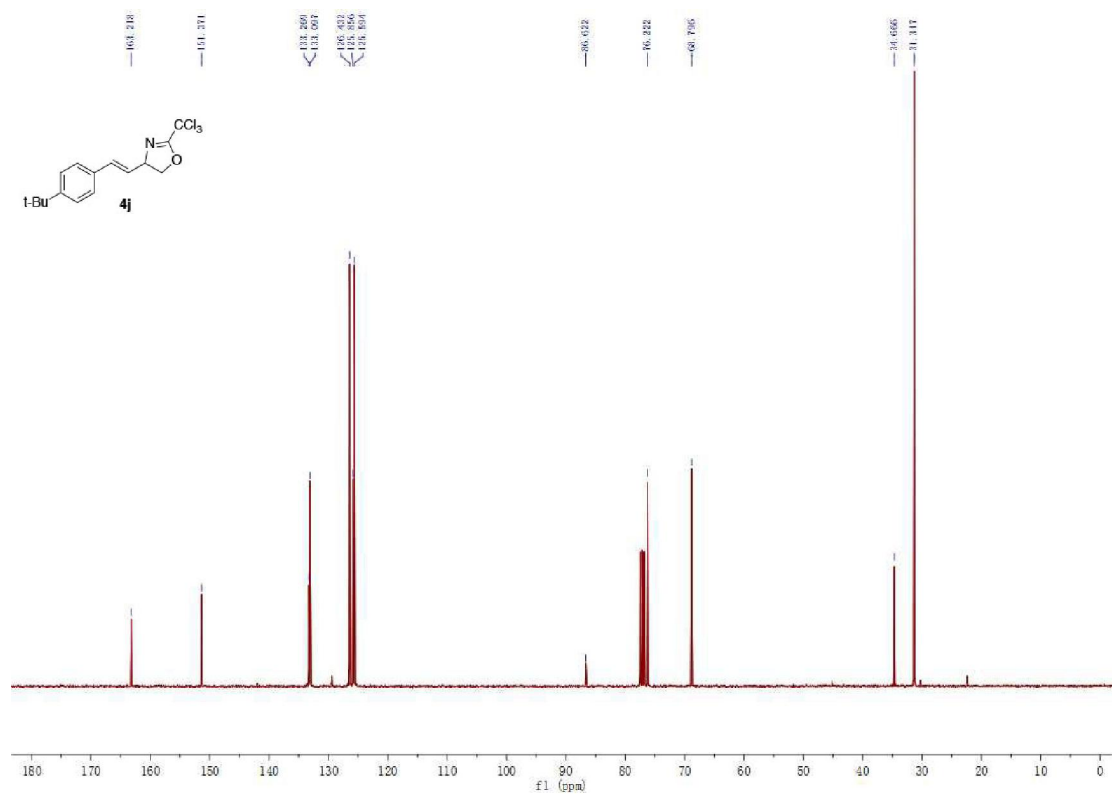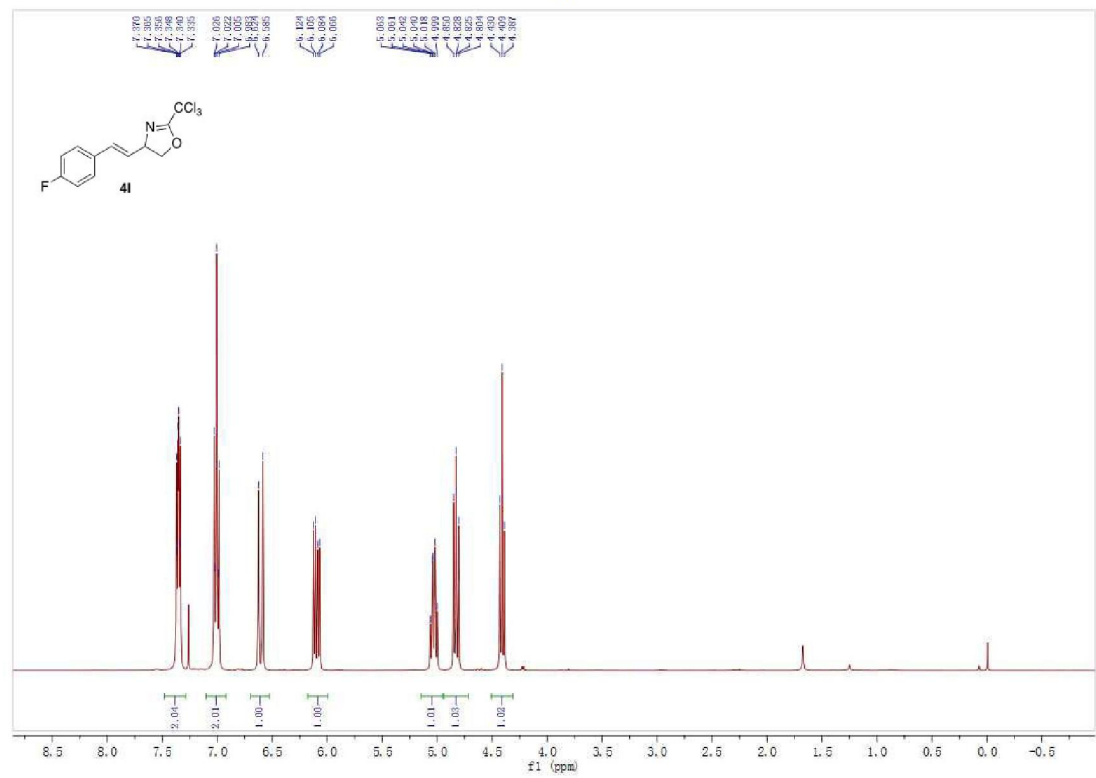

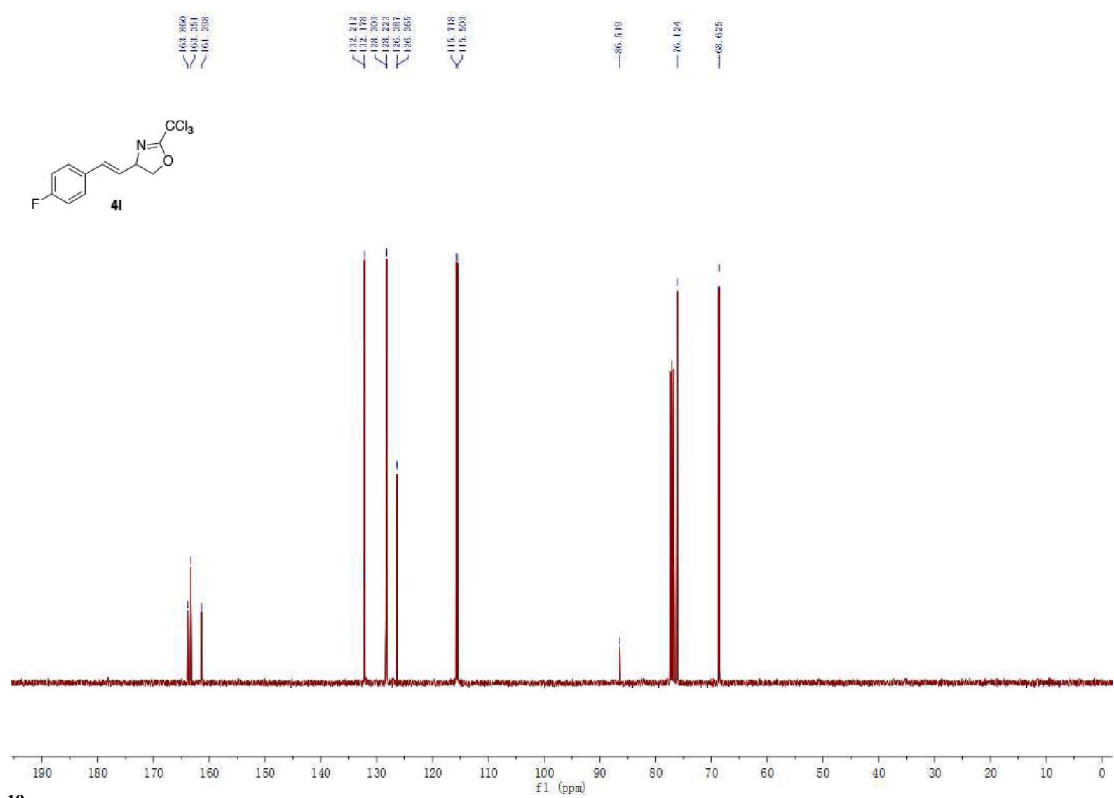

**<sup>19</sup>F NMR (376 MHz, CDCl<sub>3</sub>)**

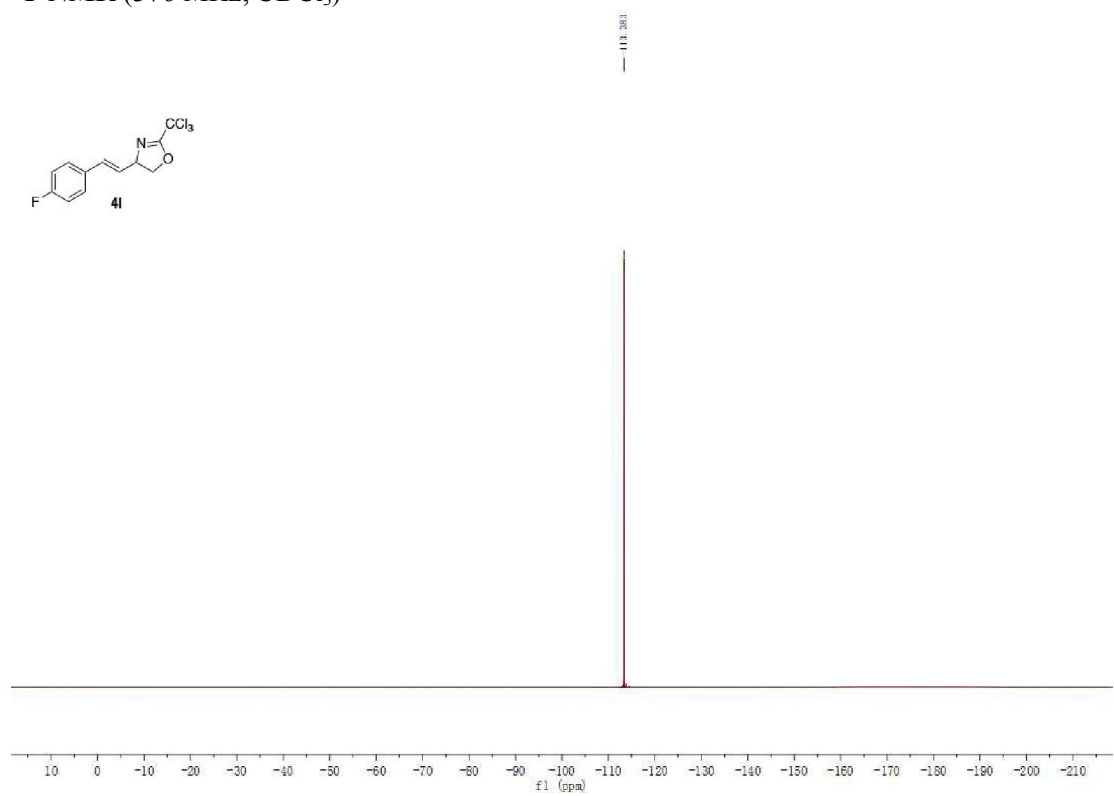

rzhu-3-71

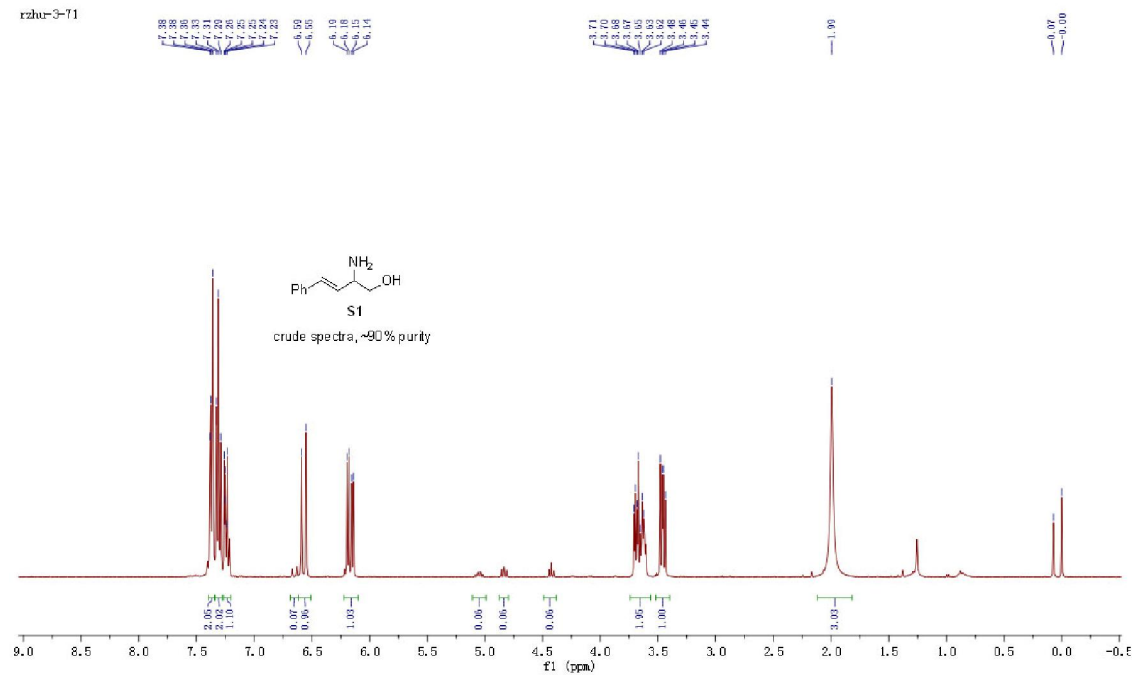

rzhu-3-71-C13

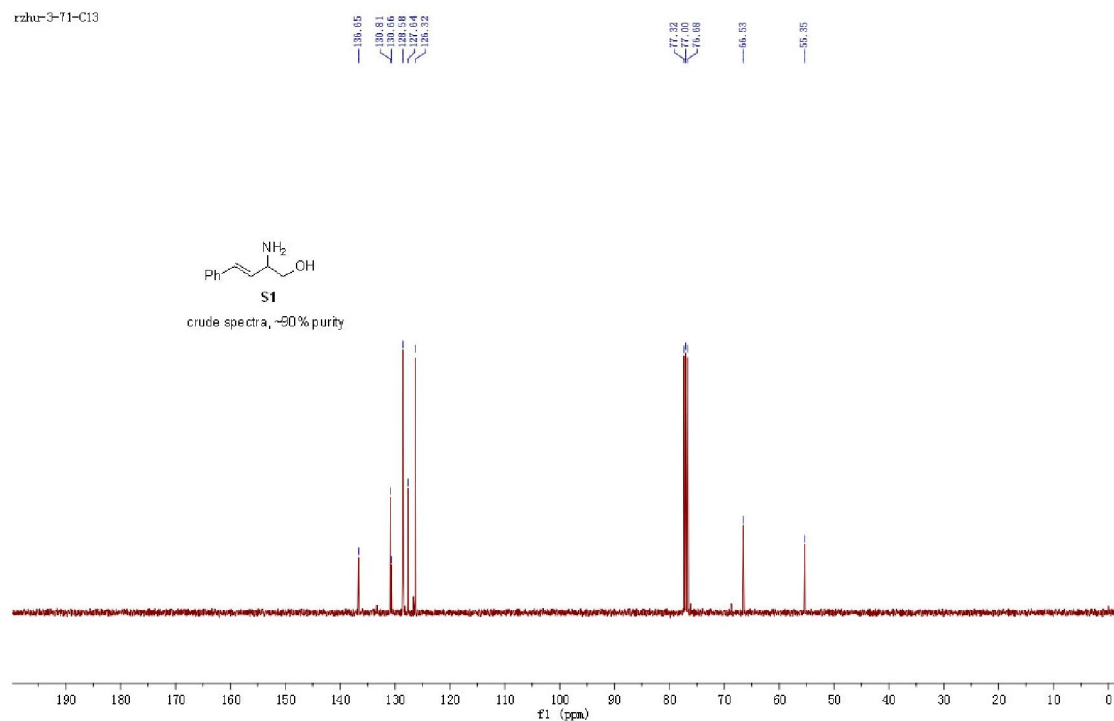

Supplement: c4ob01126k1.pdf [file c4ob01126k1.pdf]
